# Supplementary material for: Analysis of the potential role of photocurable hydrogel in patient-derived glioblastoma organoid culture through RNA sequencing
Source: Royal Society of Chemistry journal article supplement (doi:10.1039/d2bm00589a), 2022-01-01
Supplement: d2bm00589a1.pdf [file d2bm00589a1.pdf]

## Supplementary Information

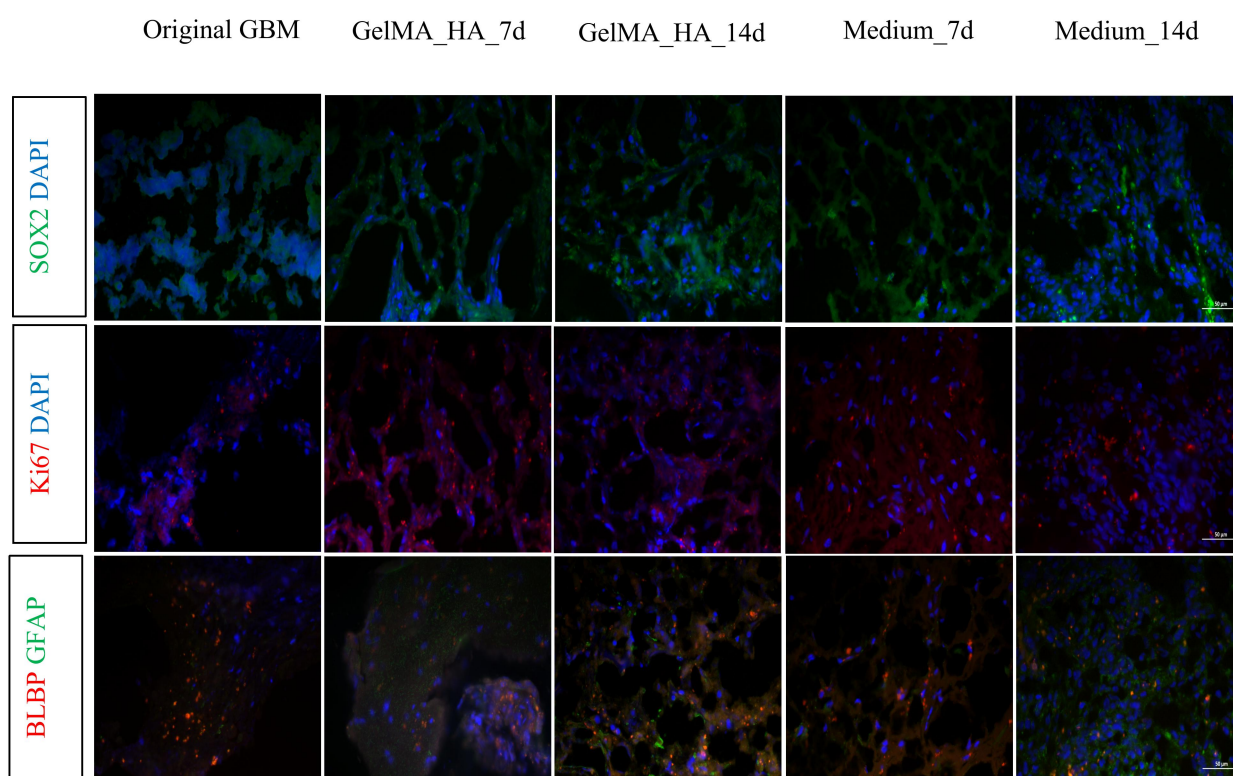

**Figure S1. Immunofluorescence staining of SOX2, KI67, BLBP, GFAP in Original GBM and GBOs. Scale bar 50  $\mu$ m.**

**Table S1** Differentially expressed genes between samples

| Original_GBM-vs-GelMA_HA_7d |                 |             | Original_GBM-vs-Medium_7d |             | Medium_7d-vs-GelMA_HA_7d |             |
|-----------------------------|-----------------|-------------|---------------------------|-------------|--------------------------|-------------|
| Symbol                      | Log2 FoldChange | FDR         | Log2 FoldChange           | FDR         | Log2 FoldChange          | FDR         |
| GFAP                        | -2.597172255    | 0           | -3.662965013              | 0           | 1.065792758              | 5.53E-222   |
| NES                         | -1.312864012    | 4.68E-66    | -1.669851398              | 1.28E-80    | 0.356987386              | 0.000967645 |
| MKI67                       | -0.201207091    | 0.143575012 | -0.87731748               | 3.43E-11    | 0.676110389              | 5.88E-08    |
| S100B                       | -1.427823654    | 0           | -3.045761574              | 0           | 1.61793792               | 3.95E-185   |
| FABP7                       | 0.757738149     | 7.19E-85    | -2.136482236              | 1.04E-254   | 2.894220385              | 0           |
| HOPX                        | -1.286195919    | 1.16E-281   | -3.902679639              | 0           | 2.616483719              | 0           |
| SOX2                        | -0.698439703    | 5.28E-16    | -2.840600178              | 1.25E-104   | 2.142160476              | 3.77E-52    |
| OLIG2                       | -1.200387113    | 5.95E-09    | -1.899633041              | 4.28E-14    | 0.699245928              | 0.023522179 |
| PROM1                       | -11.3553511     | 7.65E-55    | -0.21964181               | 1.76E-05    | -11.13570929             | 2.42E-30    |
| CRBN                        | -1.214077605    | 6.96E-141   | -1.043848462              | 5.39E-96    | -0.170229143             | 0.073143841 |
| EGFR                        | -1.284649871    | 1.88E-188   | -2.663694937              | 0           | 1.379045066              | 6.05E-45    |
| CDK12                       | -0.14172811     | 0.072245125 | -0.636492801              | 0.009132575 | 0.494764692              | 0.391545584 |
| PTEN                        | -0.797487893    | 1.13E-95    | 0.123104145               | 1.19E-05    | -0.920592037             | 1.11E-144   |
| TNKS                        | -0.533823652    | 1.36E-22    | -0.759449608              | 5.37E-35    | 0.225625957              | 0.000969898 |
| NF1                         | 0.178267196     | 0.000871638 | -0.018185472              | 1.27E-05    | 0.196452668              | 0.244832593 |
| MTOR                        | 0.284825388     | 0.327010508 | -0.255982783              | 0.000451192 | 0.540808171              | 0.01106217  |

The genes/transcripts with the parameter of false discovery rate (FDR) below 0.05 and absolute fold change $\geq$ 1 were considered differentially expressed genes. Sample on the left of “vs” is control group

**Table S2** Differentially expressed genes between samples

| Original_GBM-vs-GelMA_HA_14d |                 |             | Original_GBM-vs-Medium_14d |             | Medium_14d-vs-GelMA_HA_14d |             |
|------------------------------|-----------------|-------------|----------------------------|-------------|----------------------------|-------------|
| Symbol                       | Log2 FoldChange | FDR         | Log2 FoldChange            | FDR         | Log2 FoldChange            | FDR         |
| GFAP                         | -1.1000408      | 0           | -1.643073456               | 0           | 0.543032657                | 1.02E-89    |
| NES                          | 0.022852671     | 0.77959435  | 0.136400967                | 0.039413974 | -0.113548296               | 0.06027403  |
| MKI67                        | 1.343954401     | 7.98E-55    | 1.066726114                | 1.23E-31    | 0.277228287                | 4.94E-05    |
| S100B                        | -1.044582833    | 2.82E-195   | -1.331445465               | 4.57E-299   | 0.286862632                | 6.63E-13    |
| FABP7                        | 3.147428164     | 0           | 1.459768736                | 0           | 1.687659428                | 0           |
| HOPX                         | 0.012156062     | 0.587664236 | -1                         | 1.57E-175   | 1.012156062                | 1.51E-202   |
| SOX2                         | 0.798661052     | 5.28E-32    | -0.011846243               | 0.935374399 | 0.810507295                | 4.29E-39    |
| OLIG2                        | 1.21405312      | 4.23E-17    | 0.092589608                | 0.648814612 | 1.121463512                | 1.15E-17    |
| PROM1                        | -11.3553511     | 4.41E-55    | -1.693572999               | 2.06E-17    | -9.661778098               | 1.12E-20    |
| CRBN                         | -0.250673677    | 1.78E-08    | -0.084559959               | 0.006470378 | -0.166113718               | 0.003872649 |
| EGFR                         | 0.243195659     | 0.670842273 | -2.10203981                | 1.71E-293   | 2.345235468                | 0           |
| CDK12                        | -1.208399149    | 3.36E-11    | -0.636492801               | 0.001203492 | -0.571906348               | 0.000905418 |
| PTEN                         | -1.421247294    | 5.68E-272   | -0.65132639                | 8.92E-63    | -0.769920904               | 1.40E-75    |
| TNKS                         | 0.309380244     | 5.66E-18    | 0.373927997                | 9.54E-12    | -0.064547754               | 0.084124776 |
| NF1                          | -1.281830026    | 2.68E-22    | -1.973144508               | 4.26E-46    | 0.691314482                | 1.15E-06    |
| MTOR                         | -1.089472446    | 5.04E-32    | -0.426867342               | 1.23E-05    | -0.662605104               | 1.67E-14    |

The genes/transcripts with the parameter of false discovery rate (FDR) below 0.05 and absolute fold change $\geq$ 1 were considered differentially expressed genes. Sample on the left of “vs” is control group
