# Supplementary material for: Analysis of the potential role of photocurable hydrogel in patient-derived glioblastoma organoid culture through RNA sequencing
Source: Royal Society of Chemistry journal article supplement (doi:10.1039/d2bm00589a), 2022-01-01
Supplement: d2bm00589a2.pdf [file d2bm00589a2.pdf]

**TableS3. KEGG of Venn in Figure7 E**

| <b>GelMA_HA_No Trend Only</b>   | <b>Description</b>                      | <b>Qvalue</b> |
|---------------------------------|-----------------------------------------|---------------|
| ko04657                         | IL-17 signaling pathway                 | 5.92E-07      |
| ko03030                         | DNA replication                         | 8.26E-07      |
| ko04979                         | Cholesterol metabolism                  | 3.81E-05      |
| ko03420                         | Nucleotide excision repair              | 4.05E-04      |
| ko04110                         | Cell cycle                              | 5.14E-04      |
| ko03010                         | Ribosome                                | 5.24E-04      |
| ko04625                         | C-type lectin receptor signaling pathwa | 9.12E-04      |
| ko05166                         | HTLV-I infection                        | 2.06E-03      |
| ko03460                         | Fanconi anemia pathway                  | 2.87E-03      |
| ko05323                         | Rheumatoid arthritis                    | 3.18E-03      |
| ko03430                         | Mismatch repair                         | 4.25E-03      |
| ko01523                         | Antifolate resistance                   | 4.84E-03      |
| ko04659                         | Th17 cell differentiation               | 8.32E-03      |
| ko04658                         | Th1 and Th2 cell differentiation        | 9.45E-03      |
| ko04612                         | Antigen processing and presentation     | 1.18E-02      |
| ko04620                         | Toll-like receptor signaling pathway    | 1.41E-02      |
| ko05134                         | Legionellosis                           | 1.52E-02      |
| ko00511                         | Other glycan degradation                | 1.57E-02      |
| ko00520                         | Amino sugar and nucleotide sugar met    | 1.81E-02      |
| ko05133                         | Pertussis                               | 2.74E-02      |
| ko04210                         | Apoptosis                               | 3.28E-02      |
| ko05203                         | Viral carcinogenesis                    | 3.51E-02      |
| ko05221                         | Acute myeloid leukemia                  | 4.07E-02      |
| ko00240                         | Pyrimidine metabolism                   | 4.62E-02      |
| <b>Medium_No Trend Only</b>     |                                         |               |
| ko05200                         | Pathways in cancer                      | 5.96E-05      |
| ko04510                         | Focal adhesion                          | 1.70E-03      |
| ko05222                         | Small cell lung cancer                  | 3.77E-03      |
| ko04611                         | Platelet activation                     | 4.21E-03      |
| ko04610                         | Complement and coagulation cascades     | 8.52E-03      |
| ko04640                         | Hematopoietic cell lineage              | 1.04E-02      |
| ko05165                         | Human papillomavirus infection          | 4.19E-02      |
| <b>GelMA_HA_No Trend Common</b> |                                         |               |
| ko04142                         | Lysosome                                | 1.67E-11      |
| ko04061                         | Viral protein interaction with cytokine | 1.57E-09      |
| ko04380                         | Osteoclast differentiation              | 2.02E-08      |
| ko04668                         | TNF signaling pathway                   | 2.71E-05      |
| ko05332                         | Graft-versus-host disease               | 5.89E-05      |
| ko05321                         | Inflammatory bowel disease (IBD)        | 2.36E-04      |
| ko04062                         | Chemokine signaling pathway             | 5.14E-04      |
| ko04940                         | Type I diabetes mellitus                | 4.02E-03      |
| ko05144                         | Malaria                                 | 8.32E-03      |
| ko05145                         | Toxoplasmosis                           | 8.32E-03      |
| ko04933                         | AGE-RAGE signaling pathway in diab      | 2.32E-02      |
| <b>Medium_No Trend Common</b>   |                                         |               |
| ko04061                         | Viral protein interaction with cytokine | 1.08E-15      |
| ko04142                         | Lysosome                                | 5.86E-05      |
| ko04062                         | Chemokine signaling pathway             | 7.62E-05      |
| ko04380                         | Osteoclast differentiation              | 6.20E-04      |
| ko04933                         | AGE-RAGE signaling pathway in diab      | 6.66E-04      |
| ko04668                         | TNF signaling pathway                   | 7.49E-04      |
| ko05332                         | Graft-versus-host disease               | 1.11E-03      |
| ko05145                         | Toxoplasmosis                           | 1.56E-02      |
| ko04940                         | Type I diabetes mellitus                | 2.04E-02      |
| ko05144                         | Malaria                                 | 2.17E-02      |
| ko05321                         | Inflammatory bowel disease (IBD)        | 2.88E-02      |
| <b>GelMA_HA_Trend Only</b>      |                                         |               |

|         |                                        |          |
|---------|----------------------------------------|----------|
| ko04726 | Serotonergic synapse                   | 6.58E-04 |
| ko04270 | Vascular smooth muscle contraction     | 6.58E-04 |
| ko00260 | Glycine, serine and threonine metaboli | 1.63E-03 |
| ko04010 | MAPK signaling pathway                 | 3.48E-03 |
| ko04929 | GnRH secretion                         | 3.72E-03 |
| ko04540 | Gap junction                           | 4.14E-03 |
| ko04721 | Synaptic vesicle cycle                 | 4.14E-03 |
| ko04972 | Pancreatic secretion                   | 8.09E-03 |
| ko04927 | Cortisol synthesis and secretion       | 1.13E-02 |
| ko02010 | ABC transporters                       | 1.38E-02 |
| ko04750 | Inflammatory mediator regulation of T  | 1.50E-02 |
| ko04310 | Wnt signaling pathway                  | 2.00E-02 |
| ko04014 | Ras signaling pathway                  | 2.05E-02 |
| ko04728 | Dopaminergic synapse                   | 2.55E-02 |
| ko04730 | Long-term depression                   | 2.62E-02 |
| ko04072 | Phospholipase D signaling pathway      | 4.15E-02 |
| ko04350 | TGF-beta signaling pathway             | 4.73E-02 |

**Medium\_Trend Only**

|         |                       |          |
|---------|-----------------------|----------|
| ko05031 | Amphetamine addiction | 8.95E-04 |
|---------|-----------------------|----------|

**GelMA\_HA\_Trend Common**

|         |                                        |          |
|---------|----------------------------------------|----------|
| ko04020 | Calcium signaling pathway              | 1.89E-13 |
| ko05033 | Nicotine addiction                     | 1.74E-10 |
| ko04727 | GABAergic synapse                      | 6.26E-09 |
| ko04022 | cGMP - PKG signaling pathway           | 1.45E-07 |
| ko04724 | Glutamatergic synapse                  | 5.81E-07 |
| ko04713 | Circadian entrainment                  | 1.60E-06 |
| ko05032 | Morphine addiction                     | 1.71E-06 |
| ko04911 | Insulin secretion                      | 8.75E-06 |
| ko04742 | Taste transduction                     | 3.44E-05 |
| ko04024 | cAMP signaling pathway                 | 5.13E-05 |
| ko05412 | Arrhythmogenic right ventricular cardi | 9.33E-05 |
| ko04261 | Adrenergic signaling in cardiomyocyte  | 2.26E-04 |
| ko05410 | Hypertrophic cardiomyopathy (HCM)      | 3.10E-04 |
| ko04360 | Axon guidance                          | 5.83E-04 |
| ko04921 | Oxytocin signaling pathway             | 6.58E-04 |
| ko04971 | Gastric acid secretion                 | 1.33E-03 |
| ko04723 | Retrograde endocannabinoid signaling   | 1.45E-03 |
| ko04924 | Renin secretion                        | 1.45E-03 |
| ko05168 | Herpes simplex infection               | 1.45E-03 |
| ko05414 | Dilated cardiomyopathy (DCM)           | 1.58E-03 |
| ko04260 | Cardiac muscle contraction             | 2.57E-03 |
| ko04970 | Salivary secretion                     | 4.14E-03 |
| ko04725 | Cholinergic synapse                    | 9.86E-03 |
| ko04925 | Aldosterone synthesis and secretion    | 1.09E-02 |
| ko05030 | Cocaine addiction                      | 1.74E-02 |
| ko00250 | Alanine, aspartate and glutamate metal | 4.04E-02 |

**Medium\_Trend Common**

|         |                                        |          |
|---------|----------------------------------------|----------|
| ko04020 | Calcium signaling pathway              | 8.45E-09 |
| ko04727 | GABAergic synapse                      | 1.21E-06 |
| ko05168 | Herpes simplex infection               | 1.62E-06 |
| ko05033 | Nicotine addiction                     | 2.92E-06 |
| ko05032 | Morphine addiction                     | 2.50E-04 |
| ko04911 | Insulin secretion                      | 2.50E-04 |
| ko04713 | Circadian entrainment                  | 2.97E-04 |
| ko04024 | cAMP signaling pathway                 | 4.00E-04 |
| ko04723 | Retrograde endocannabinoid signaling   | 3.77E-03 |
| ko04261 | Adrenergic signaling in cardiomyocyte  | 6.31E-03 |
| ko04724 | Glutamatergic synapse                  | 6.46E-03 |
| ko04725 | Cholinergic synapse                    | 8.70E-03 |
| ko04925 | Aldosterone synthesis and secretion    | 8.70E-03 |
| ko04742 | Taste transduction                     | 9.86E-03 |
| ko04921 | Oxytocin signaling pathway             | 9.86E-03 |
| ko00250 | Alanine, aspartate and glutamate metal | 9.86E-03 |
| ko04971 | Gastric acid secretion                 | 1.35E-02 |
| ko05414 | Dilated cardiomyopathy (DCM)           | 1.67E-02 |
| ko04924 | Renin secretion                        | 1.84E-02 |
| ko05412 | Arrhythmogenic right ventricular cardi | 2.07E-02 |
| ko04970 | Salivary secretion                     | 2.07E-02 |
| ko05410 | Hypertrophic cardiomyopathy (HCM)      | 2.07E-02 |
| ko04260 | Cardiac muscle contraction             | 2.42E-02 |
| ko05030 | Cocaine addiction                      | 3.36E-02 |
| ko04022 | cGMP - PKG signaling pathway           | 4.17E-02 |



**Table S4. GO of Venn in Figure 7 F**

| <b>GelMA HA No Trend Only</b> | <b>Description</b>                                        | <b>Qvalue</b> |
|-------------------------------|-----------------------------------------------------------|---------------|
| GO:0044427                    | chromosomal part                                          | 1.70E-21      |
| GO:0005694                    | chromosome                                                | 1.70E-21      |
| GO:1903047                    | mitotic cell cycle process                                | 3.12E-13      |
| GO:0043228                    | non-membrane-bounded organelle                            | 1.20E-12      |
| GO:0043232                    | intracellular non-membrane-bounded organelle              | 1.79E-12      |
| GO:0007049                    | cell cycle                                                | 2.32E-12      |
| GO:0000278                    | mitotic cell cycle                                        | 2.77E-12      |
| GO:0098687                    | chromosomal region                                        | 3.87E-12      |
| GO:0007051                    | spindle organization                                      | 1.34E-11      |
| GO:0022402                    | cell cycle process                                        | 1.39E-11      |
| GO:0007052                    | mitotic spindle organization                              | 1.52E-11      |
| GO:1902850                    | microtubule cytoskeleton organization involved in mitosis | 1.76E-11      |
| GO:0000777                    | condensed chromosome kinetochore                          | 2.38E-11      |
| GO:0031974                    | membrane-enclosed lumen                                   | 3.81E-11      |
| GO:0043233                    | organelle lumen                                           | 3.81E-11      |
| GO:0070013                    | intracellular organelle lumen                             | 3.81E-11      |
| GO:0051301                    | cell division                                             | 9.02E-11      |
| GO:0000776                    | kinetochore                                               | 1.23E-10      |
| GO:0044446                    | intracellular organelle part                              | 6.73E-10      |
| GO:0000785                    | chromatin                                                 | 9.19E-10      |
| GO:0140014                    | mitotic nuclear division                                  | 2.75E-09      |
| GO:0071103                    | DNA conformation change                                   | 2.92E-08      |
| GO:0006259                    | DNA metabolic process                                     | 3.64E-08      |
| GO:1901360                    | organic cyclic compound metabolic process                 | 5.79E-08      |
| GO:0006974                    | cellular response to DNA damage stimulus                  | 7.13E-08      |
| GO:0000075                    | cell cycle checkpoint                                     | 1.21E-07      |
| GO:0044422                    | organelle part                                            | 1.46E-07      |
| GO:0005654                    | nucleoplasm                                               | 1.55E-07      |
| GO:0051276                    | chromosome organization                                   | 2.06E-07      |
| GO:0006323                    | DNA packaging                                             | 2.08E-07      |
| GO:0043227                    | membrane-bounded organelle                                | 4.48E-07      |
| GO:0032993                    | protein-DNA complex                                       | 5.62E-07      |
| GO:0031981                    | nuclear lumen                                             | 6.10E-07      |
| GO:0044424                    | intracellular part                                        | 8.38E-07      |
| GO:0033554                    | cellular response to stress                               | 8.53E-07      |
| GO:0005622                    | intracellular                                             | 8.54E-07      |
| GO:0044815                    | DNA packaging complex                                     | 9.06E-07      |
| GO:0051726                    | regulation of cell cycle                                  | 1.44E-06      |
| GO:0006725                    | cellular aromatic compound metabolic process              | 1.62E-06      |
| GO:0034641                    | cellular nitrogen compound metabolic process              | 1.62E-06      |
| GO:0046483                    | heterocycle metabolic process                             | 2.75E-06      |
| GO:0044428                    | nuclear part                                              | 3.55E-06      |
| GO:0044419                    | interspecies interaction between organisms                | 4.08E-06      |
| GO:0006139                    | nucleobase-containing compound metabolic process          | 5.49E-06      |
| GO:0048285                    | organelle fission                                         | 5.87E-06      |
| GO:0009892                    | negative regulation of metabolic process                  | 5.89E-06      |
| GO:0043229                    | intracellular organelle                                   | 6.00E-06      |
| GO:0007093                    | mitotic cell cycle checkpoint                             | 7.97E-06      |
| GO:0006260                    | DNA replication                                           | 8.88E-06      |
| GO:0044403                    | symbiont process                                          | 9.36E-06      |
| GO:0030261                    | chromosome condensation                                   | 1.02E-05      |
| GO:0010629                    | negative regulation of gene expression                    | 1.11E-05      |
| GO:0006281                    | DNA repair                                                | 1.19E-05      |
| GO:0044237                    | cellular metabolic process                                | 1.21E-05      |
| GO:0005657                    | replication fork                                          | 1.21E-05      |
| GO:0016032                    | viral process                                             | 1.26E-05      |
| GO:0009058                    | biosynthetic process                                      | 1.35E-05      |
| GO:0006334                    | nucleosome assembly                                       | 1.36E-05      |
| GO:0007346                    | regulation of mitotic cell cycle                          | 1.64E-05      |
| GO:0044770                    | cell cycle phase transition                               | 1.67E-05      |
| GO:0005774                    | vacuolar membrane                                         | 1.77E-05      |
| GO:0000228                    | nuclear chromosome                                        | 1.77E-05      |
| GO:0031497                    | chromatin assembly                                        | 1.97E-05      |
| GO:0008152                    | metabolic process                                         | 2.38E-05      |
| GO:0034508                    | centromere complex assembly                               | 2.84E-05      |
| GO:0044786                    | cell cycle DNA replication                                | 3.53E-05      |
| GO:0034080                    | CENP-A containing nucleosome assembly                     | 3.53E-05      |
| GO:0061641                    | CENP-A containing chromatin organization                  | 3.53E-05      |
| GO:0044772                    | mitotic cell cycle phase transition                       | 3.59E-05      |
| GO:0044249                    | cellular biosynthetic process                             | 3.64E-05      |

|            |                                                               |          |
|------------|---------------------------------------------------------------|----------|
| GO:0006310 | DNA recombination                                             | 3.68E-05 |
| GO:0045787 | positive regulation of cell cycle                             | 4.43E-05 |
| GO:0005737 | cytoplasm                                                     | 5.50E-05 |
| GO:0043231 | intracellular membrane-bounded organelle                      | 5.72E-05 |
| GO:0045786 | negative regulation of cell cycle                             | 6.37E-05 |
| GO:0090304 | nucleic acid metabolic process                                | 6.56E-05 |
| GO:0042611 | MHC protein complex                                           | 6.59E-05 |
| GO:0009890 | negative regulation of biosynthetic process                   | 7.25E-05 |
| GO:0009411 | response to UV                                                | 7.81E-05 |
| GO:0042613 | MHC class II protein complex                                  | 7.88E-05 |
| GO:0045892 | negative regulation of transcription, DNA-templated           | 7.93E-05 |
| GO:0005634 | nucleus                                                       | 8.03E-05 |
| GO:0044444 | cytoplasmic part                                              | 8.39E-05 |
| GO:1903507 | negative regulation of nucleic acid-templated transcription   | 8.94E-05 |
| GO:1902679 | negative regulation of RNA biosynthetic process               | 9.92E-05 |
| GO:0010564 | regulation of cell cycle process                              | 9.93E-05 |
| GO:0019222 | regulation of metabolic process                               | 0.0001   |
| GO:0009891 | positive regulation of biosynthetic process                   | 0.0001   |
| GO:0031323 | regulation of cellular metabolic process                      | 0.0001   |
| GO:0010605 | negative regulation of macromolecule metabolic process        | 0.00011  |
| GO:0031055 | chromatin remodeling at centromere                            | 0.00012  |
| GO:0043226 | organelle                                                     | 0.00012  |
| GO:0000786 | nucleosome                                                    | 0.00012  |
| GO:0042627 | chylomicron                                                   | 0.00012  |
| GO:0002396 | MHC protein complex assembly                                  | 0.00012  |
| GO:0045935 | positive regulation of nucleobase-containing compound me      | 0.00012  |
| GO:1901576 | organic substance biosynthetic process                        | 0.00013  |
| GO:0044271 | cellular nitrogen compound biosynthetic process               | 0.00014  |
| GO:0035578 | azurophil granule lumen                                       | 0.00014  |
| GO:0051052 | regulation of DNA metabolic process                           | 0.00015  |
| GO:0031327 | negative regulation of cellular biosynthetic process          | 0.00015  |
| GO:0005819 | spindle                                                       | 0.00017  |
| GO:0071404 | cellular response to low-density lipoprotein particle stimult | 0.00021  |
| GO:0031328 | positive regulation of cellular biosynthetic process          | 0.00021  |
| GO:0051233 | spindle midzone                                               | 0.00023  |
| GO:0048002 | antigen processing and presentation of peptide antigen        | 0.00023  |
| GO:0045934 | negative regulation of nucleobase-containing compound me      | 0.00024  |
| GO:0006807 | nitrogen compound metabolic process                           | 0.00024  |
| GO:0031324 | negative regulation of cellular metabolic process             | 0.00024  |
| GO:0009059 | macromolecule biosynthetic process                            | 0.00025  |
| GO:0071704 | organic substance metabolic process                           | 0.00025  |
| GO:0019882 | antigen processing and presentation                           | 0.00028  |
| GO:0033260 | nuclear DNA replication                                       | 0.00029  |
| GO:0019083 | viral transcription                                           | 0.00029  |
| GO:0051253 | negative regulation of RNA metabolic process                  | 0.00029  |
| GO:0032133 | chromosome passenger complex                                  | 0.00031  |
| GO:0000796 | condensin complex                                             | 0.00034  |
| GO:0030894 | replisome                                                     | 0.00035  |
| GO:0031570 | DNA integrity checkpoint                                      | 0.00036  |
| GO:1901987 | regulation of cell cycle phase transition                     | 0.00037  |
| GO:1901990 | regulation of mitotic cell cycle phase transition             | 0.00037  |
| GO:0006336 | DNA replication-independent nucleosome assembly               | 0.00038  |
| GO:0036297 | interstrand cross-link repair                                 | 0.00042  |
| GO:0042359 | vitamin D metabolic process                                   | 0.00042  |
| GO:0042770 | signal transduction in response to DNA damage                 | 0.00046  |
| GO:1901362 | organic cyclic compound biosynthetic process                  | 0.00046  |
| GO:0003735 | structural constituent of ribosome                            | 0.0005   |
| GO:0034724 | DNA replication-independent nucleosome organization           | 0.00052  |
| GO:0007088 | regulation of mitotic nuclear division                        | 0.00053  |
| GO:0044391 | ribosomal subunit                                             | 0.00054  |
| GO:0000922 | spindle pole                                                  | 0.00054  |
| GO:0006333 | chromatin assembly or disassembly                             | 0.00055  |
| GO:0034645 | cellular macromolecule biosynthetic process                   | 0.00057  |
| GO:0002501 | peptide antigen assembly with MHC protein complex             | 0.00057  |
| GO:0051172 | negative regulation of nitrogen compound metabolic proces     | 0.00058  |
| GO:0022626 | cytosolic ribosome                                            | 0.00058  |
| GO:0002221 | pattern recognition receptor signaling pathway                | 0.00058  |
| GO:2000113 | negative regulation of cellular macromolecule biosynthetic    | 0.00059  |
| GO:0034654 | nucleobase-containing compound biosynthetic process           | 0.00062  |
| GO:0051256 | mitotic spindle midzone assembly                              | 0.00062  |
| GO:0015949 | nucleobase-containing small molecule interconversion          | 0.00065  |
| GO:0034375 | high-density lipoprotein particle remodeling                  | 0.00065  |

|            |                                                                          |         |
|------------|--------------------------------------------------------------------------|---------|
| GO:0043691 | reverse cholesterol transport                                            | 0.00065 |
| GO:0009110 | vitamin biosynthetic process                                             | 0.00068 |
| GO:0010558 | negative regulation of macromolecule biosynthetic process                | 0.00073 |
| GO:0043170 | macromolecule metabolic process                                          | 0.00074 |
| GO:0018130 | heterocycle biosynthetic process                                         | 0.00075 |
| GO:0055092 | sterol homeostasis                                                       | 0.00075 |
| GO:1901988 | negative regulation of cell cycle phase transition                       | 0.00076 |
| GO:0007076 | mitotic chromosome condensation                                          | 0.00078 |
| GO:0006342 | chromatin silencing                                                      | 0.0008  |
| GO:0051171 | regulation of nitrogen compound metabolic process                        | 0.0008  |
| GO:0019438 | aromatic compound biosynthetic process                                   | 0.00084 |
| GO:0034470 | ncRNA processing                                                         | 0.00084 |
| GO:0045637 | regulation of myeloid cell differentiation                               | 0.00084 |
| GO:0060255 | regulation of macromolecule metabolic process                            | 0.00087 |
| GO:0044238 | primary metabolic process                                                | 0.00088 |
| GO:0065004 | protein-DNA complex assembly                                             | 0.00088 |
| GO:0044260 | cellular macromolecule metabolic process                                 | 0.00089 |
| GO:0045814 | negative regulation of gene expression, epigenetic                       | 0.00089 |
| GO:0051235 | maintenance of location                                                  | 0.00092 |
| GO:0072395 | signal transduction involved in cell cycle checkpoint                    | 0.00094 |
| GO:0005515 | protein binding                                                          | 0.00094 |
| GO:0002495 | antigen processing and presentation of peptide antigen via MHC           | 0.00097 |
| GO:0006270 | DNA replication initiation                                               | 0.00097 |
| GO:0090305 | nucleic acid phosphodiester bond hydrolysis                              | 0.00097 |
| GO:1990023 | mitotic spindle midzone                                                  | 0.00101 |
| GO:0010948 | negative regulation of cell cycle process                                | 0.00102 |
| GO:0010885 | regulation of cholesterol storage                                        | 0.00102 |
| GO:0032201 | telomere maintenance via semi-conservative replication                   | 0.00108 |
| GO:0010557 | positive regulation of macromolecule biosynthetic process                | 0.00108 |
| GO:0055088 | lipid homeostasis                                                        | 0.0011  |
| GO:0006271 | DNA strand elongation involved in DNA replication                        | 0.0011  |
| GO:0005730 | nucleolus                                                                | 0.00115 |
| GO:0090068 | positive regulation of cell cycle process                                | 0.00115 |
| GO:0080135 | regulation of cellular response to stress                                | 0.00117 |
| GO:0045893 | positive regulation of transcription, DNA-templated                      | 0.00118 |
| GO:1903508 | positive regulation of nucleic acid-templated transcription              | 0.00118 |
| GO:1902680 | positive regulation of RNA biosynthetic process                          | 0.00124 |
| GO:0034728 | nucleosome organization                                                  | 0.00133 |
| GO:0042632 | cholesterol homeostasis                                                  | 0.00141 |
| GO:0019058 | viral life cycle                                                         | 0.00145 |
| GO:0044283 | small molecule biosynthetic process                                      | 0.00149 |
| GO:0002478 | antigen processing and presentation of exogenous peptide antigen         | 0.00149 |
| GO:0005840 | ribosome                                                                 | 0.0015  |
| GO:0080090 | regulation of primary metabolic process                                  | 0.00151 |
| GO:0008608 | attachment of spindle microtubules to kinetochore                        | 0.00152 |
| GO:0005658 | alpha DNA polymerase:primase complex                                     | 0.00153 |
| GO:0034363 | intermediate-density lipoprotein particle                                | 0.00153 |
| GO:0002504 | antigen processing and presentation of peptide or polysaccharide antigen | 0.00165 |
| GO:0034384 | high-density lipoprotein particle clearance                              | 0.00166 |
| GO:0051988 | regulation of attachment of spindle microtubules to kinetochore          | 0.00166 |
| GO:0043154 | negative regulation of cysteine-type endopeptidase activity              | 0.00177 |
| GO:1901991 | negative regulation of mitotic cell cycle phase transition               | 0.00178 |
| GO:0006297 | nucleotide-excision repair, DNA gap filling                              | 0.00178 |
| GO:0000022 | mitotic spindle elongation                                               | 0.00179 |
| GO:0002291 | T cell activation via T cell receptor contact with antigen bearing cell  | 0.00179 |
| GO:0034371 | chylomicron remodeling                                                   | 0.00179 |
| GO:0051231 | spindle elongation                                                       | 0.00179 |
| GO:1902749 | regulation of cell cycle G2/M phase transition                           | 0.0018  |
| GO:0006614 | SRP-dependent cotranslational protein targeting to membrane              | 0.00181 |
| GO:0034361 | very-low-density lipoprotein particle                                    | 0.0019  |
| GO:0034385 | triglyceride-rich plasma lipoprotein particle                            | 0.0019  |
| GO:0045598 | regulation of fat cell differentiation                                   | 0.00195 |
| GO:0006766 | vitamin metabolic process                                                | 0.00196 |
| GO:0002218 | activation of innate immune response                                     | 0.00207 |
| GO:0044281 | small molecule metabolic process                                         | 0.00214 |
| GO:0044839 | cell cycle G2/M phase transition                                         | 0.00217 |
| GO:0019886 | antigen processing and presentation of exogenous peptide antigen         | 0.00217 |
| GO:0042802 | identical protein binding                                                | 0.00217 |
| GO:0051701 | interaction with host                                                    | 0.00222 |
| GO:0043596 | nuclear replication fork                                                 | 0.00222 |
| GO:0002758 | innate immune response-activating signal transduction                    | 0.00224 |
| GO:0000018 | regulation of DNA recombination                                          | 0.00227 |

|            |                                                                |         |
|------------|----------------------------------------------------------------|---------|
| GO:0050810 | regulation of steroid biosynthetic process                     | 0.00227 |
| GO:0006269 | DNA replication, synthesis of RNA primer                       | 0.00234 |
| GO:1904044 | response to aldosterone                                        | 0.00234 |
| GO:0045944 | positive regulation of transcription by RNA polymerase II      | 0.00238 |
| GO:2001188 | regulation of T cell activation via T cell receptor contact wi | 0.00238 |
| GO:0046885 | regulation of hormone biosynthetic process                     | 0.00241 |
| GO:0006613 | cotranslational protein targeting to membrane                  | 0.00244 |
| GO:0000083 | regulation of transcription involved in G1/S transition of m   | 0.00253 |
| GO:0071156 | regulation of cell cycle arrest                                | 0.00256 |
| GO:0009163 | nucleoside biosynthetic process                                | 0.00256 |
| GO:0000082 | G1/S transition of mitotic cell cycle                          | 0.0026  |
| GO:0015934 | large ribosomal subunit                                        | 0.00263 |
| GO:0071556 | integral component of luminal side of endoplasmic reticulu     | 0.00263 |
| GO:0098553 | luminal side of endoplasmic reticulum membrane                 | 0.00263 |
| GO:0034154 | toll-like receptor 7 signaling pathway                         | 0.00267 |
| GO:0051255 | spindle midzone assembly                                       | 0.00267 |
| GO:0045930 | negative regulation of mitotic cell cycle                      | 0.00267 |
| GO:0051985 | negative regulation of chromosome segregation                  | 0.0027  |
| GO:1901659 | glycosyl compound biosynthetic process                         | 0.0027  |
| GO:0044454 | nuclear chromosome part                                        | 0.0027  |
| GO:0072401 | signal transduction involved in DNA integrity checkpoint       | 0.00273 |
| GO:0072422 | signal transduction involved in DNA damage checkpoint          | 0.00273 |
| GO:0072686 | mitotic spindle                                                | 0.00276 |
| GO:1904813 | ficolin-1-rich granule lumen                                   | 0.00277 |
| GO:0043601 | nuclear replisome                                              | 0.00297 |
| GO:0046700 | heterocycle catabolic process                                  | 0.00309 |
| GO:0051254 | positive regulation of RNA metabolic process                   | 0.00314 |
| GO:0002544 | chronic inflammatory response                                  | 0.00315 |
| GO:0051382 | kinetochore assembly                                           | 0.00315 |
| GO:0045911 | positive regulation of DNA recombination                       | 0.00339 |
| GO:0002181 | cytoplasmic translation                                        | 0.00339 |
| GO:0006302 | double-strand break repair                                     | 0.00347 |
| GO:0000226 | microtubule cytoskeleton organization                          | 0.00352 |
| GO:0060968 | regulation of gene silencing                                   | 0.00352 |
| GO:0045670 | regulation of osteoclast differentiation                       | 0.00353 |
| GO:2000117 | negative regulation of cysteine-type endopeptidase activity    | 0.00358 |
| GO:0006364 | rRNA processing                                                | 0.00371 |
| GO:0009889 | regulation of biosynthetic process                             | 0.00373 |
| GO:1901361 | organic cyclic compound catabolic process                      | 0.00374 |
| GO:0097193 | intrinsic apoptotic signaling pathway                          | 0.00376 |
| GO:0019439 | aromatic compound catabolic process                            | 0.00383 |
| GO:0019884 | antigen processing and presentation of exogenous antigen       | 0.00387 |
| GO:0044843 | cell cycle G1/S phase transition                               | 0.00404 |
| GO:0016070 | RNA metabolic process                                          | 0.00408 |
| GO:0045454 | cell redox homeostasis                                         | 0.00412 |
| GO:0003676 | nucleic acid binding                                           | 0.00413 |
| GO:0007050 | cell cycle arrest                                              | 0.0043  |
| GO:0006775 | fat-soluble vitamin metabolic process                          | 0.00432 |
| GO:0030330 | DNA damage response, signal transduction by p53 class me       | 0.00432 |
| GO:0003677 | DNA binding                                                    | 0.00442 |
| GO:0002763 | positive regulation of myeloid leukocyte differentiation       | 0.00446 |
| GO:0044270 | cellular nitrogen compound catabolic process                   | 0.00455 |
| GO:0045066 | regulatory T cell differentiation                              | 0.00471 |
| GO:0022625 | cytosolic large ribosomal subunit                              | 0.00473 |
| GO:0034404 | nucleobase-containing small molecule biosynthetic process      | 0.00473 |
| GO:0000077 | DNA damage checkpoint                                          | 0.00489 |
| GO:2001251 | negative regulation of chromosome organization                 | 0.00489 |
| GO:0006284 | base-excision repair                                           | 0.0049  |
| GO:0006261 | DNA-dependent DNA replication                                  | 0.00491 |
| GO:0022616 | DNA strand elongation                                          | 0.00496 |
| GO:0042474 | middle ear morphogenesis                                       | 0.00502 |
| GO:0033700 | phospholipid efflux                                            | 0.00506 |
| GO:0034122 | negative regulation of toll-like receptor signaling pathway    | 0.00506 |
| GO:0048246 | macrophage chemotaxis                                          | 0.00506 |
| GO:0044445 | cytosolic part                                                 | 0.0052  |
| GO:1902969 | mitotic DNA replication                                        | 0.00525 |
| GO:0007569 | cell aging                                                     | 0.00534 |
| GO:0040029 | regulation of gene expression, epigenetic                      | 0.00543 |
| GO:0010628 | positive regulation of gene expression                         | 0.00546 |
| GO:0071824 | protein-DNA complex subunit organization                       | 0.00547 |
| GO:0000122 | negative regulation of transcription by RNA polymerase II      | 0.00553 |
| GO:0009954 | proximal/distal pattern formation                              | 0.00564 |

|            |                                                               |         |
|------------|---------------------------------------------------------------|---------|
| GO:0032633 | interleukin-4 production                                      | 0.00564 |
| GO:0032673 | regulation of interleukin-4 production                        | 0.00564 |
| GO:0034368 | protein-lipid complex remodeling                              | 0.00564 |
| GO:0034369 | plasma lipoprotein particle remodeling                        | 0.00564 |
| GO:0016051 | carbohydrate biosynthetic process                             | 0.00606 |
| GO:0032392 | DNA geometric change                                          | 0.0062  |
| GO:0006296 | nucleotide-excision repair, DNA incision, 5'-to lesion        | 0.00624 |
| GO:0071478 | cellular response to radiation                                | 0.00626 |
| GO:0051054 | positive regulation of DNA metabolic process                  | 0.00628 |
| GO:0005767 | secondary lysosome                                            | 0.00631 |
| GO:0002361 | CD4-positive, CD25-positive, alpha-beta regulatory T cell c   | 0.00634 |
| GO:0010369 | chromocenter                                                  | 0.00655 |
| GO:0034362 | low-density lipoprotein particle                              | 0.00655 |
| GO:0051304 | chromosome separation                                         | 0.00655 |
| GO:0032200 | telomere organization                                         | 0.00658 |
| GO:0035821 | modification of morphology or physiology of other organis     | 0.0067  |
| GO:0032010 | phagolysosome                                                 | 0.00672 |
| GO:0002363 | alpha-beta T cell lineage commitment                          | 0.00679 |
| GO:0000723 | telomere maintenance                                          | 0.00681 |
| GO:0006996 | organelle organization                                        | 0.00681 |
| GO:0045940 | positive regulation of steroid metabolic process              | 0.00681 |
| GO:0051302 | regulation of cell division                                   | 0.00694 |
| GO:0032508 | DNA duplex unwinding                                          | 0.00714 |
| GO:0044774 | mitotic DNA integrity checkpoint                              | 0.00714 |
| GO:0009314 | response to radiation                                         | 0.00724 |
| GO:0000184 | nuclear-transcribed mRNA catabolic process, nonsense-mec      | 0.00754 |
| GO:0046983 | protein dimerization activity                                 | 0.00757 |
| GO:0009112 | nucleobase metabolic process                                  | 0.00767 |
| GO:0031326 | regulation of cellular biosynthetic process                   | 0.00767 |
| GO:0031262 | Ndc80 complex                                                 | 0.00772 |
| GO:0033256 | I-kappaB/NF-kappaB complex                                    | 0.00772 |
| GO:0035976 | transcription factor AP-1 complex                             | 0.00772 |
| GO:0010984 | regulation of lipoprotein particle clearance                  | 0.00773 |
| GO:0045444 | fat cell differentiation                                      | 0.00809 |
| GO:0016572 | histone phosphorylation                                       | 0.00825 |
| GO:0034655 | nucleobase-containing compound catabolic process              | 0.00826 |
| GO:1901617 | organic hydroxy compound biosynthetic process                 | 0.00827 |
| GO:1902563 | regulation of neutrophil activation                           | 0.00835 |
| GO:2001198 | regulation of dendritic cell differentiation                  | 0.00835 |
| GO:0032693 | negative regulation of interleukin-10 production              | 0.00853 |
| GO:1901363 | heterocyclic compound binding                                 | 0.00862 |
| GO:0097159 | organic cyclic compound binding                               | 0.00873 |
| GO:0042771 | intrinsic apoptotic signaling pathway in response to DNA d    | 0.00876 |
| GO:0018158 | protein oxidation                                             | 0.00885 |
| GO:0010032 | meiotic chromosome condensation                               | 0.00893 |
| GO:0015889 | cobalamin transport                                           | 0.00893 |
| GO:0019262 | N-acetylneuraminate catabolic process                         | 0.00893 |
| GO:1903232 | melanosome assembly                                           | 0.00893 |
| GO:0042605 | peptide antigen binding                                       | 0.00946 |
| GO:0045047 | protein targeting to ER                                       | 0.00957 |
| GO:0000086 | G2/M transition of mitotic cell cycle                         | 0.00992 |
| GO:0006287 | base-excision repair, gap-filling                             | 0.01027 |
| GO:0034367 | protein-containing complex remodeling                         | 0.01027 |
| GO:0009142 | nucleoside triphosphate biosynthetic process                  | 0.01027 |
| GO:0002399 | MHC class II protein complex assembly                         | 0.0103  |
| GO:0002503 | peptide antigen assembly with MHC class II protein comple     | 0.0103  |
| GO:0034164 | negative regulation of toll-like receptor 9 signaling pathway | 0.0103  |
| GO:1902564 | negative regulation of neutrophil activation                  | 0.0103  |
| GO:1990637 | response to prolactin                                         | 0.0103  |
| GO:0005829 | cytosol                                                       | 0.01052 |
| GO:0033683 | nucleotide-excision repair, DNA incision                      | 0.01072 |
| GO:0042769 | DNA damage response, detection of DNA damage                  | 0.01072 |
| GO:0071482 | cellular response to light stimulus                           | 0.01072 |
| GO:0019080 | viral gene expression                                         | 0.01078 |
| GO:0070268 | cornification                                                 | 0.01094 |
| GO:0009395 | phospholipid catabolic process                                | 0.01094 |
| GO:0030890 | positive regulation of B cell proliferation                   | 0.01094 |
| GO:0072539 | T-helper 17 cell differentiation                              | 0.01141 |
| GO:1904666 | regulation of ubiquitin protein ligase activity               | 0.01141 |
| GO:0010389 | regulation of G2/M transition of mitotic cell cycle           | 0.01143 |
| GO:0002577 | regulation of antigen processing and presentation             | 0.01144 |
| GO:0042276 | error-prone translesion synthesis                             | 0.01144 |



|            |                                                               |         |
|------------|---------------------------------------------------------------|---------|
| GO:0006641 | triglyceride metabolic process                                | 0.01181 |
| GO:0032465 | regulation of cytokinesis                                     | 0.01192 |
| GO:0071840 | cellular component organization or biogenesis                 | 0.01246 |
| GO:0000079 | regulation of cyclin-dependent protein serine/threonine kin   | 0.01299 |
| GO:0031334 | positive regulation of protein complex assembly               | 0.0133  |
| GO:0002755 | MyD88-dependent toll-like receptor signaling pathway          | 0.0134  |
| GO:0090322 | regulation of superoxide metabolic process                    | 0.0134  |
| GO:0008202 | steroid metabolic process                                     | 0.01347 |
| GO:0030670 | phagocytic vesicle membrane                                   | 0.01363 |
| GO:0090734 | site of DNA damage                                            | 0.01363 |
| GO:0034144 | negative regulation of toll-like receptor 4 signaling pathway | 0.01371 |
| GO:0060346 | bone trabecula formation                                      | 0.01371 |
| GO:0032735 | positive regulation of interleukin-12 production              | 0.01373 |
| GO:0046461 | neutral lipid catabolic process                               | 0.01374 |
| GO:0046464 | acylglycerol catabolic process                                | 0.01374 |
| GO:0034162 | toll-like receptor 9 signaling pathway                        | 0.01375 |
| GO:0042451 | purine nucleoside biosynthetic process                        | 0.01375 |
| GO:0046129 | purine ribonucleoside biosynthetic process                    | 0.01375 |
| GO:0000725 | recombinational repair                                        | 0.01395 |
| GO:0005815 | microtubule organizing center                                 | 0.01439 |
| GO:0005876 | spindle microtubule                                           | 0.01451 |
| GO:0002070 | epithelial cell maturation                                    | 0.01451 |
| GO:1902166 | negative regulation of intrinsic apoptotic signaling pathway  | 0.01451 |
| GO:1901264 | carbohydrate derivative transport                             | 0.01496 |
| GO:0046598 | positive regulation of viral entry into host cell             | 0.01505 |
| GO:2000508 | regulation of dendritic cell chemotaxis                       | 0.01505 |
| GO:0003682 | chromatin binding                                             | 0.01514 |
| GO:0072413 | signal transduction involved in mitotic cell cycle checkpoin  | 0.01543 |
| GO:0002507 | tolerance induction                                           | 0.01557 |
| GO:0046503 | glycerolipid catabolic process                                | 0.01564 |
| GO:0070542 | response to fatty acid                                        | 0.01624 |
| GO:0051225 | spindle assembly                                              | 0.01638 |
| GO:0072599 | establishment of protein localization to endoplasmic reticul  | 0.01638 |
| GO:1990748 | cellular detoxification                                       | 0.01638 |
| GO:0045596 | negative regulation of cell differentiation                   | 0.01653 |
| GO:0002449 | lymphocyte mediated immunity                                  | 0.01653 |
| GO:1903707 | negative regulation of hemopoiesis                            | 0.0166  |
| GO:0019219 | regulation of nucleobase-containing compound metabolic p      | 0.01661 |
| GO:0060575 | intestinal epithelial cell differentiation                    | 0.01665 |
| GO:0045589 | regulation of regulatory T cell differentiation               | 0.01667 |
| GO:0010467 | gene expression                                               | 0.01675 |
| GO:0044242 | cellular lipid catabolic process                              | 0.01677 |
| GO:1901615 | organic hydroxy compound metabolic process                    | 0.01693 |
| GO:0034358 | plasma lipoprotein particle                                   | 0.01696 |
| GO:1990777 | lipoprotein particle                                          | 0.01696 |
| GO:0045667 | regulation of osteoblast differentiation                      | 0.01705 |
| GO:0042455 | ribonucleoside biosynthetic process                           | 0.01724 |
| GO:0140097 | catalytic activity, acting on DNA                             | 0.01732 |
| GO:0030669 | clathrin-coated endocytic vesicle membrane                    | 0.01733 |
| GO:0060333 | interferon-gamma-mediated signaling pathway                   | 0.01739 |
| GO:0032350 | regulation of hormone metabolic process                       | 0.01744 |
| GO:0042254 | ribosome biogenesis                                           | 0.01759 |
| GO:0120115 | Lsm2-8 complex                                                | 0.01762 |
| GO:0016052 | carbohydrate catabolic process                                | 0.01835 |
| GO:2001020 | regulation of response to DNA damage stimulus                 | 0.01835 |
| GO:0006165 | nucleoside diphosphate phosphorylation                        | 0.01885 |
| GO:0032753 | positive regulation of interleukin-4 production               | 0.01914 |
| GO:0045672 | positive regulation of osteoclast differentiation             | 0.01914 |
| GO:0000724 | double-strand break repair via homologous recombination       | 0.01939 |
| GO:0009148 | pyrimidine nucleoside triphosphate biosynthetic process       | 0.01972 |
| GO:0043486 | histone exchange                                              | 0.01972 |
| GO:2001141 | regulation of RNA biosynthetic process                        | 0.02018 |
| GO:0015918 | sterol transport                                              | 0.0203  |
| GO:0032774 | RNA biosynthetic process                                      | 0.02039 |
| GO:0000731 | DNA synthesis involved in DNA repair                          | 0.02039 |
| GO:0021602 | cranial nerve morphogenesis                                   | 0.02084 |
| GO:0006639 | acylglycerol metabolic process                                | 0.02128 |
| GO:0051129 | negative regulation of cellular component organization        | 0.02131 |
| GO:0010468 | regulation of gene expression                                 | 0.02159 |
| GO:0045668 | negative regulation of osteoblast differentiation             | 0.02182 |
| GO:0050869 | negative regulation of B cell activation                      | 0.02182 |
| GO:0000791 | euchromatin                                                   | 0.02187 |

|            |                                                               |         |
|------------|---------------------------------------------------------------|---------|
| GO:0019985 | translesion synthesis                                         | 0.02212 |
| GO:0031099 | regeneration                                                  | 0.02212 |
| GO:0002676 | regulation of chronic inflammatory response                   | 0.02212 |
| GO:0002924 | negative regulation of humoral immune response mediated       | 0.02212 |
| GO:0006689 | ganglioside catabolic process                                 | 0.02212 |
| GO:0010886 | positive regulation of cholesterol storage                    | 0.02212 |
| GO:0010989 | negative regulation of low-density lipoprotein particle clear | 0.02212 |
| GO:0032466 | negative regulation of cytokinesis                            | 0.02212 |
| GO:0046836 | glycolipid transport                                          | 0.02212 |
| GO:0016072 | rRNA metabolic process                                        | 0.02238 |
| GO:0005813 | centrosome                                                    | 0.02249 |
| GO:0006206 | pyrimidine nucleobase metabolic process                       | 0.02254 |
| GO:0051044 | positive regulation of membrane protein ectodomain proteo     | 0.02254 |
| GO:0055091 | phospholipid homeostasis                                      | 0.02254 |
| GO:0016042 | lipid catabolic process                                       | 0.02254 |
| GO:0019218 | regulation of steroid metabolic process                       | 0.02257 |
| GO:1904029 | regulation of cyclin-dependent protein kinase activity        | 0.02257 |
| GO:0002253 | activation of immune response                                 | 0.02226 |
| GO:0000781 | chromosome, telomeric region                                  | 0.02266 |
| GO:0098754 | detoxification                                                | 0.02291 |
| GO:0010894 | negative regulation of steroid biosynthetic process           | 0.02316 |
| GO:0032682 | negative regulation of chemokine production                   | 0.02316 |
| GO:0001836 | release of cytochrome c from mitochondria                     | 0.0232  |
| GO:1902402 | signal transduction involved in mitotic DNA damage check      | 0.0232  |
| GO:1902403 | signal transduction involved in mitotic DNA integrity check   | 0.0232  |
| GO:0006638 | neutral lipid metabolic process                               | 0.02338 |
| GO:0046939 | nucleotide phosphorylation                                    | 0.02338 |
| GO:0002764 | immune response-regulating signaling pathway                  | 0.02432 |
| GO:0048704 | embryonic skeletal system morphogenesis                       | 0.02456 |
| GO:0071813 | lipoprotein particle binding                                  | 0.02485 |
| GO:0071814 | protein-lipid complex binding                                 | 0.02485 |
| GO:0002923 | regulation of humoral immune response mediated by circul      | 0.02492 |
| GO:0043922 | negative regulation by host of viral transcription            | 0.02492 |
| GO:0150079 | negative regulation of neuroinflammatory response             | 0.02492 |
| GO:1904667 | negative regulation of ubiquitin protein ligase activity      | 0.02492 |
| GO:2000779 | regulation of double-strand break repair                      | 0.02503 |
| GO:0035404 | histone-serine phosphorylation                                | 0.02559 |
| GO:0035747 | natural killer cell chemotaxis                                | 0.02559 |
| GO:2000510 | positive regulation of dendritic cell chemotaxis              | 0.02559 |
| GO:0006355 | regulation of transcription, DNA-templated                    | 0.02573 |
| GO:0072331 | signal transduction by p53 class mediator                     | 0.02687 |
| GO:1903506 | regulation of nucleic acid-templated transcription            | 0.0269  |
| GO:0019900 | kinase binding                                                | 0.02708 |
| GO:0050691 | regulation of defense response to virus by host               | 0.02723 |
| GO:0000183 | chromatin silencing at rDNA                                   | 0.02765 |
| GO:0032371 | regulation of sterol transport                                | 0.02774 |
| GO:0032374 | regulation of cholesterol transport                           | 0.02774 |
| GO:0002523 | leukocyte migration involved in inflammatory response         | 0.02795 |
| GO:0045655 | regulation of monocyte differentiation                        | 0.02795 |
| GO:0019217 | regulation of fatty acid metabolic process                    | 0.02798 |
| GO:0015630 | microtubule cytoskeleton                                      | 0.02811 |
| GO:0000444 | MIS12/MIND type complex                                       | 0.02818 |
| GO:1990726 | Lsm1-7-Pat1 complex                                           | 0.02818 |
| GO:0002757 | immune response-activating signal transduction                | 0.02843 |
| GO:0006412 | translation                                                   | 0.02844 |
| GO:0033044 | regulation of chromosome organization                         | 0.02844 |
| GO:1901654 | response to ketone                                            | 0.02848 |
| GO:0032088 | negative regulation of NF-kappaB transcription factor activ   | 0.02863 |
| GO:0042446 | hormone biosynthetic process                                  | 0.02863 |
| GO:0070192 | chromosome organization involved in meiotic cell cycle        | 0.02865 |
| GO:0045639 | positive regulation of myeloid cell differentiation           | 0.02915 |
| GO:0098869 | cellular oxidant detoxification                               | 0.02915 |
| GO:0070972 | protein localization to endoplasmic reticulum                 | 0.02947 |
| GO:0045132 | meiotic chromosome segregation                                | 0.03036 |
| GO:0006301 | postreplication repair                                        | 0.03074 |
| GO:0045600 | positive regulation of fat cell differentiation               | 0.03074 |
| GO:0009147 | pyrimidine nucleoside triphosphate metabolic process          | 0.03158 |
| GO:0045120 | pronucleus                                                    | 0.03225 |
| GO:0010997 | anaphase-promoting complex binding                            | 0.03256 |
| GO:0043603 | cellular amide metabolic process                              | 0.03339 |
| GO:0010224 | response to UV-B                                              | 0.03339 |
| GO:0060192 | negative regulation of lipase activity                        | 0.03339 |

|            |                                                               |         |
|------------|---------------------------------------------------------------|---------|
| GO:0090713 | immunological memory process                                  | 0.03339 |
| GO:1902165 | regulation of intrinsic apoptotic signaling pathway in respon | 0.03339 |
| GO:0044450 | microtubule organizing center part                            | 0.03359 |
| GO:0009987 | cellular process                                              | 0.03365 |
| GO:0007143 | female meiotic nuclear division                               | 0.03382 |
| GO:0010957 | negative regulation of vitamin D biosynthetic process         | 0.03382 |
| GO:0032829 | regulation of CD4-positive, CD25-positive, alpha-beta regu    | 0.03382 |
| GO:0032831 | positive regulation of CD4-positive, CD25-positive, alpha-t   | 0.03382 |
| GO:0060023 | soft palate development                                       | 0.03382 |
| GO:0060266 | negative regulation of respiratory burst involved in inflamn  | 0.03382 |
| GO:0060268 | negative regulation of respiratory burst                      | 0.03382 |
| GO:0061757 | leukocyte adhesion to arterial endothelial cell               | 0.03382 |
| GO:1905333 | regulation of gastric motility                                | 0.03382 |
| GO:0030204 | chondroitin sulfate metabolic process                         | 0.03427 |
| GO:0030866 | cortical actin cytoskeleton organization                      | 0.03427 |
| GO:2000134 | negative regulation of G1/S transition of mitotic cell cycle  | 0.03438 |
| GO:0032994 | protein-lipid complex                                         | 0.03451 |
| GO:0000737 | DNA catabolic process, endonucleolytic                        | 0.03458 |
| GO:0072538 | T-helper 17 type immune response                              | 0.03458 |
| GO:0006977 | DNA damage response, signal transduction by p53 class me      | 0.0348  |
| GO:0046434 | organophosphate catabolic process                             | 0.03483 |
| GO:0071158 | positive regulation of cell cycle arrest                      | 0.03569 |
| GO:0042180 | cellular ketone metabolic process                             | 0.0358  |
| GO:0034364 | high-density lipoprotein particle                             | 0.03605 |
| GO:0031571 | mitotic G1 DNA damage checkpoint                              | 0.03608 |
| GO:0090307 | mitotic spindle assembly                                      | 0.03608 |
| GO:0001823 | mesonephros development                                       | 0.03608 |
| GO:0046165 | alcohol biosynthetic process                                  | 0.03617 |
| GO:0005688 | U6 snRNP                                                      | 0.03665 |
| GO:0072528 | pyrimidine-containing compound biosynthetic process           | 0.03695 |
| GO:0009201 | ribonucleoside triphosphate biosynthetic process              | 0.03742 |
| GO:0031391 | Elg1 RFC-like complex                                         | 0.03756 |
| GO:0033181 | plasma membrane proton-transporting V-type ATPase comj        | 0.03756 |
| GO:0035985 | senescence-associated heterochromatin focus                   | 0.03756 |
| GO:0097149 | centralspindlin complex                                       | 0.03756 |
| GO:0006351 | transcription, DNA-templated                                  | 0.03804 |
| GO:0032488 | Cdc42 protein signal transduction                             | 0.03865 |
| GO:0034370 | triglyceride-rich lipoprotein particle remodeling             | 0.03865 |
| GO:0046348 | amino sugar catabolic process                                 | 0.03865 |
| GO:1905168 | positive regulation of double-strand break repair via homol   | 0.03865 |
| GO:0032479 | regulation of type I interferon production                    | 0.03865 |
| GO:0032606 | type I interferon production                                  | 0.03865 |
| GO:1902254 | negative regulation of intrinsic apoptotic signaling pathway  | 0.03865 |
| GO:0031668 | cellular response to extracellular stimulus                   | 0.0392  |
| GO:0034502 | protein localization to chromosome                            | 0.0392  |
| GO:0097659 | nucleic acid-templated transcription                          | 0.03924 |
| GO:0051817 | modification of morphology or physiology of other organis     | 0.03946 |
| GO:0022627 | cytosolic small ribosomal subunit                             | 0.03954 |
| GO:0045931 | positive regulation of mitotic cell cycle                     | 0.04052 |
| GO:0060964 | regulation of gene silencing by miRNA                         | 0.04072 |
| GO:0006694 | steroid biosynthetic process                                  | 0.04072 |
| GO:0060249 | anatomical structure homeostasis                              | 0.04122 |
| GO:0072431 | signal transduction involved in mitotic G1 DNA damage ch      | 0.04122 |
| GO:1902400 | intracellular signal transduction involved in G1 DNA dama     | 0.04122 |
| GO:0023026 | MHC class II protein complex binding                          | 0.04145 |
| GO:0055102 | lipase inhibitor activity                                     | 0.04145 |
| GO:0005488 | binding                                                       | 0.04145 |
| GO:0031726 | CCR1 chemokine receptor binding                               | 0.04145 |
| GO:0072345 | NAADP-sensitive calcium-release channel activity              | 0.04145 |
| GO:0006309 | apoptotic DNA fragmentation                                   | 0.04189 |
| GO:0010884 | positive regulation of lipid storage                          | 0.04189 |
| GO:0045939 | negative regulation of steroid metabolic process              | 0.04189 |
| GO:0071459 | protein localization to chromosome, centromeric region        | 0.04189 |
| GO:0044783 | G1 DNA damage checkpoint                                      | 0.042   |
| GO:0044819 | mitotic G1/S transition checkpoint                            | 0.042   |
| GO:0046006 | regulation of activated T cell proliferation                  | 0.04203 |
| GO:1901293 | nucleoside phosphate biosynthetic process                     | 0.04221 |
| GO:0006054 | N-acetylneuraminate metabolic process                         | 0.04227 |
| GO:0034378 | chylomicron assembly                                          | 0.04227 |
| GO:0045657 | positive regulation of monocyte differentiation               | 0.04227 |
| GO:0062012 | regulation of small molecule metabolic process                | 0.04251 |
| GO:0009165 | nucleotide biosynthetic process                               | 0.04251 |

|                             |                                                                |          |
|-----------------------------|----------------------------------------------------------------|----------|
| GO:0002158                  | osteoclast proliferation                                       | 0.04251  |
| GO:0034382                  | chylomicron remnant clearance                                  | 0.04251  |
| GO:0071830                  | triglyceride-rich lipoprotein particle clearance               | 0.04251  |
| GO:1901724                  | positive regulation of cell proliferation involved in kidney c | 0.04251  |
| GO:2000501                  | regulation of natural killer cell chemotaxis                   | 0.04251  |
| GO:0060969                  | negative regulation of gene silencing                          | 0.04251  |
| GO:0097421                  | liver regeneration                                             | 0.04251  |
| GO:0000303                  | response to superoxide                                         | 0.04258  |
| GO:0006294                  | nucleotide-excision repair, preincision complex assembly       | 0.04258  |
| GO:0046134                  | pyrimidine nucleoside biosynthetic process                     | 0.04258  |
| GO:0002230                  | positive regulation of defense response to virus by host       | 0.04272  |
| GO:0002712                  | regulation of B cell mediated immunity                         | 0.04272  |
| GO:0002889                  | regulation of immunoglobulin mediated immune response          | 0.04272  |
| GO:0019216                  | regulation of lipid metabolic process                          | 0.04272  |
| GO:0062013                  | positive regulation of small molecule metabolic process        | 0.04272  |
| GO:0001807                  | regulation of type IV hypersensitivity                         | 0.04272  |
| GO:0002266                  | follicular dendritic cell activation                           | 0.04272  |
| GO:0002277                  | myeloid dendritic cell activation involved in immune respo     | 0.04272  |
| GO:0002397                  | MHC class I protein complex assembly                           | 0.04272  |
| GO:0002774                  | Fc receptor mediated inhibitory signaling pathway              | 0.04272  |
| GO:0007057                  | spindle assembly involved in female meiosis I                  | 0.04272  |
| GO:0010956                  | negative regulation of calcidiol 1-monoxygenase activity       | 0.04272  |
| GO:0021569                  | rhombomere 3 development                                       | 0.04272  |
| GO:0030910                  | olfactory placode formation                                    | 0.04272  |
| GO:0032875                  | regulation of DNA endoreduplication                            | 0.04272  |
| GO:0035283                  | central nervous system segmentation                            | 0.04272  |
| GO:0035284                  | brain segmentation                                             | 0.04272  |
| GO:0035986                  | senescence-associated heterochromatin focus assembly           | 0.04272  |
| GO:0048852                  | diencephalon morphogenesis                                     | 0.04272  |
| GO:0055095                  | lipoprotein particle mediated signaling                        | 0.04272  |
| GO:0055096                  | low-density lipoprotein particle mediated signaling            | 0.04272  |
| GO:0060557                  | positive regulation of vitamin D biosynthetic process          | 0.04272  |
| GO:0060559                  | positive regulation of calcidiol 1-monoxygenase activity       | 0.04272  |
| GO:0071698                  | olfactory placode development                                  | 0.04272  |
| GO:0071699                  | olfactory placode morphogenesis                                | 0.04272  |
| GO:0090402                  | oncogene-induced cell senescence                               | 0.04272  |
| GO:1905463                  | negative regulation of DNA duplex unwinding                    | 0.04272  |
| GO:2000520                  | regulation of immunological synapse formation                  | 0.04272  |
| GO:2001190                  | positive regulation of T cell activation via T cell receptor c | 0.04272  |
| GO:0005975                  | carbohydrate metabolic process                                 | 0.04388  |
| GO:0034660                  | ncRNA metabolic process                                        | 0.04413  |
| GO:0002377                  | immunoglobulin production                                      | 0.04432  |
| GO:0010556                  | regulation of macromolecule biosynthetic process               | 0.04445  |
| GO:0002639                  | positive regulation of immunoglobulin production               | 0.04477  |
| GO:0031936                  | negative regulation of chromatin silencing                     | 0.04515  |
| GO:0046112                  | nucleobase biosynthetic process                                | 0.04515  |
| GO:1903978                  | regulation of microglial cell activation                       | 0.04515  |
| GO:0047655                  | allyl-alcohol dehydrogenase activity                           | 0.04539  |
| GO:0044773                  | mitotic DNA damage checkpoint                                  | 0.04554  |
| GO:0072332                  | intrinsic apoptotic signaling pathway by p53 class mediator    | 0.04627  |
| GO:1902652                  | secondary alcohol metabolic process                            | 0.04638  |
| GO:0045861                  | negative regulation of proteolysis                             | 0.04672  |
| GO:0006275                  | regulation of DNA replication                                  | 0.04672  |
| GO:1902807                  | negative regulation of cell cycle G1/S phase transition        | 0.04672  |
| GO:0006518                  | peptide metabolic process                                      | 0.04771  |
| GO:0046364                  | monosaccharide biosynthetic process                            | 0.04831  |
| GO:0060147                  | regulation of posttranscriptional gene silencing               | 0.04849  |
| GO:0060966                  | regulation of gene silencing by RNA                            | 0.04849  |
| GO:0009988                  | cell-cell recognition                                          | 0.04851  |
| GO:0043043                  | peptide biosynthetic process                                   | 0.04896  |
| GO:1901135                  | carbohydrate derivative metabolic process                      | 0.04898  |
| GO:0051180                  | vitamin transport                                              | 0.04924  |
| GO:1990000                  | amyloid fibril formation                                       | 0.04965  |
| GO:0071825                  | protein-lipid complex subunit organization                     | 0.04965  |
| GO:0007017                  | microtubule-based process                                      | 0.04965  |
| GO:1901575                  | organic substance catabolic process                            | 0.04965  |
| GO:0002637                  | regulation of immunoglobulin production                        | 0.04965  |
| GO:0010875                  | positive regulation of cholesterol efflux                      | 0.04965  |
| GO:0051004                  | regulation of lipoprotein lipase activity                      | 0.04965  |
| GO:0070987                  | error-free translesion synthesis                               | 0.04965  |
| <b>Medium_No Trend Only</b> |                                                                |          |
| GO:0001667                  | ameboidal-type cell migration                                  | 3.05E-12 |

|            |                                                                          |          |
|------------|--------------------------------------------------------------------------|----------|
| GO:0030199 | collagen fibril organization                                             | 3.92E-12 |
| GO:0002040 | sprouting angiogenesis                                                   | 2.00E-09 |
| GO:0007599 | hemostasis                                                               | 4.67E-09 |
| GO:0050817 | coagulation                                                              | 5.63E-09 |
| GO:0007596 | blood coagulation                                                        | 9.07E-09 |
| GO:0005788 | endoplasmic reticulum lumen                                              | 1.49E-08 |
| GO:0001936 | regulation of endothelial cell proliferation                             | 1.03E-07 |
| GO:0001935 | endothelial cell proliferation                                           | 2.42E-07 |
| GO:0030168 | platelet activation                                                      | 3.94E-07 |
| GO:0043534 | blood vessel endothelial cell migration                                  | 5.11E-07 |
| GO:0048871 | multicellular organismal homeostasis                                     | 5.66E-07 |
| GO:0003158 | endothelium development                                                  | 1.23E-06 |
| GO:0034103 | regulation of tissue remodeling                                          | 1.31E-06 |
| GO:0061041 | regulation of wound healing                                              | 1.38E-06 |
| GO:0010594 | regulation of endothelial cell migration                                 | 1.40E-06 |
| GO:0005518 | collagen binding                                                         | 2.05E-06 |
| GO:0098644 | complex of collagen trimers                                              | 2.39E-06 |
| GO:0001503 | ossification                                                             | 3.25E-06 |
| GO:0030020 | extracellular matrix structural constituent conferring tensile strength  | 3.99E-06 |
| GO:0009719 | response to endogenous stimulus                                          | 5.82E-06 |
| GO:0033628 | regulation of cell adhesion mediated by integrin                         | 8.25E-06 |
| GO:0022617 | extracellular matrix disassembly                                         | 8.59E-06 |
| GO:0045121 | membrane raft                                                            | 1.15E-05 |
| GO:0098857 | membrane microdomain                                                     | 1.15E-05 |
| GO:0050679 | positive regulation of epithelial cell proliferation                     | 1.50E-05 |
| GO:0050777 | negative regulation of immune response                                   | 1.78E-05 |
| GO:0050818 | regulation of coagulation                                                | 2.04E-05 |
| GO:0002042 | cell migration involved in sprouting angiogenesis                        | 3.54E-05 |
| GO:0042832 | defense response to protozoan                                            | 3.55E-05 |
| GO:0045446 | endothelial cell differentiation                                         | 3.71E-05 |
| GO:0048729 | tissue morphogenesis                                                     | 3.95E-05 |
| GO:0001938 | positive regulation of endothelial cell proliferation                    | 5.21E-05 |
| GO:0007369 | gastrulation                                                             | 5.33E-05 |
| GO:0043535 | regulation of blood vessel endothelial cell migration                    | 5.70E-05 |
| GO:1900046 | regulation of hemostasis                                                 | 6.24E-05 |
| GO:0044706 | multi-multicellular organism process                                     | 6.38E-05 |
| GO:0098589 | membrane region                                                          | 6.88E-05 |
| GO:0001562 | response to protozoan                                                    | 7.53E-05 |
| GO:0035924 | cellular response to vascular endothelial growth factor stimulus         | 7.65E-05 |
| GO:0006869 | lipid transport                                                          | 9.21E-05 |
| GO:0030193 | regulation of blood coagulation                                          | 9.25E-05 |
| GO:0060055 | angiogenesis involved in wound healing                                   | 0.0001   |
| GO:0010634 | positive regulation of epithelial cell migration                         | 0.00011  |
| GO:0045576 | mast cell activation                                                     | 0.00011  |
| GO:0038084 | vascular endothelial growth factor signaling pathway                     | 0.00011  |
| GO:0010876 | lipid localization                                                       | 0.00012  |
| GO:0005583 | fibrillar collagen trimer                                                | 0.00014  |
| GO:0098643 | banded collagen fibril                                                   | 0.00014  |
| GO:0001776 | leukocyte homeostasis                                                    | 0.00015  |
| GO:0010243 | response to organonitrogen compound                                      | 0.00015  |
| GO:0002720 | positive regulation of cytokine production involved in immunity          | 0.00016  |
| GO:0032835 | glomerulus development                                                   | 0.00017  |
| GO:0071495 | cellular response to endogenous stimulus                                 | 0.00018  |
| GO:0010712 | regulation of collagen metabolic process                                 | 0.00018  |
| GO:0002675 | positive regulation of acute inflammatory response                       | 0.00019  |
| GO:0048608 | reproductive structure development                                       | 0.00024  |
| GO:0050819 | negative regulation of coagulation                                       | 0.00024  |
| GO:0098657 | import into cell                                                         | 0.00027  |
| GO:0090184 | positive regulation of kidney development                                | 0.00027  |
| GO:0002532 | production of molecular mediator involved in inflammatory response       | 0.00028  |
| GO:0031214 | biomineral tissue development                                            | 0.00029  |
| GO:0070161 | anchoring junction                                                       | 0.00032  |
| GO:0061458 | reproductive system development                                          | 0.00033  |
| GO:0002448 | mast cell mediated immunity                                              | 0.0004   |
| GO:1903727 | positive regulation of phospholipid metabolic process                    | 0.0004   |
| GO:0070304 | positive regulation of stress-activated protein kinase signaling pathway | 0.00042  |
| GO:0033003 | regulation of mast cell activation                                       | 0.00042  |
| GO:0007264 | small GTPase mediated signal transduction                                | 0.00044  |
| GO:0023057 | negative regulation of signaling                                         | 0.00047  |
| GO:0048872 | homeostasis of number of cells                                           | 0.00047  |
| GO:0014068 | positive regulation of phosphatidylinositol 3-kinase signaling pathway   | 0.00048  |
| GO:0007229 | integrin-mediated signaling pathway                                      | 0.00048  |

|            |                                                               |         |
|------------|---------------------------------------------------------------|---------|
| GO:0010648 | negative regulation of cell communication                     | 0.00051 |
| GO:0071229 | cellular response to acid chemical                            | 0.00052 |
| GO:0030282 | bone mineralization                                           | 0.00052 |
| GO:0046660 | female sex differentiation                                    | 0.00052 |
| GO:0032147 | activation of protein kinase activity                         | 0.00053 |
| GO:0034446 | substrate adhesion-dependent cell spreading                   | 0.00054 |
| GO:0071363 | cellular response to growth factor stimulus                   | 0.00054 |
| GO:0009968 | negative regulation of signal transduction                    | 0.00055 |
| GO:0004222 | metalloendopeptidase activity                                 | 0.00056 |
| GO:0001894 | tissue homeostasis                                            | 0.00057 |
| GO:0010595 | positive regulation of endothelial cell migration             | 0.0006  |
| GO:1901698 | response to nitrogen compound                                 | 0.00061 |
| GO:0030183 | B cell differentiation                                        | 0.00061 |
| GO:0046777 | protein autophosphorylation                                   | 0.00064 |
| GO:1900047 | negative regulation of hemostasis                             | 0.00075 |
| GO:0005912 | adherens junction                                             | 0.00075 |
| GO:0002009 | morphogenesis of an epithelium                                | 0.00083 |
| GO:0061134 | peptidase regulator activity                                  | 0.00089 |
| GO:0070848 | response to growth factor                                     | 0.0009  |
| GO:0002062 | chondrocyte differentiation                                   | 0.00095 |
| GO:0007565 | female pregnancy                                              | 0.00098 |
| GO:0043406 | positive regulation of MAP kinase activity                    | 0.00102 |
| GO:0002710 | negative regulation of T cell mediated immunity               | 0.00106 |
| GO:0072012 | glomerulus vasculature development                            | 0.00106 |
| GO:0032874 | positive regulation of stress-activated MAPK cascade          | 0.00108 |
| GO:0070141 | response to UV-A                                              | 0.00113 |
| GO:0030036 | actin cytoskeleton organization                               | 0.00113 |
| GO:0061042 | vascular wound healing                                        | 0.00123 |
| GO:0098543 | detection of other organism                                   | 0.00123 |
| GO:0002064 | epithelial cell development                                   | 0.00126 |
| GO:0006897 | endocytosis                                                   | 0.00128 |
| GO:0001569 | branching involved in blood vessel morphogenesis              | 0.00139 |
| GO:0045601 | regulation of endothelial cell differentiation                | 0.00142 |
| GO:0022612 | gland morphogenesis                                           | 0.00147 |
| GO:0004953 | icosanoid receptor activity                                   | 0.0015  |
| GO:1903670 | regulation of sprouting angiogenesis                          | 0.00154 |
| GO:0030195 | negative regulation of blood coagulation                      | 0.00155 |
| GO:0014812 | muscle cell migration                                         | 0.00158 |
| GO:0005902 | microvillus                                                   | 0.00159 |
| GO:0012505 | endomembrane system                                           | 0.0016  |
| GO:0042267 | natural killer cell mediated cytotoxicity                     | 0.0016  |
| GO:0070167 | regulation of biomineral tissue development                   | 0.00176 |
| GO:0043303 | mast cell degranulation                                       | 0.00177 |
| GO:0002719 | negative regulation of cytokine production involved in imm    | 0.0018  |
| GO:2000241 | regulation of reproductive process                            | 0.0018  |
| GO:0071902 | positive regulation of protein serine/threonine kinase activi | 0.00184 |
| GO:0048565 | digestive tract development                                   | 0.00187 |
| GO:0045124 | regulation of bone resorption                                 | 0.00187 |
| GO:0003006 | developmental process involved in reproduction                | 0.00188 |
| GO:0014909 | smooth muscle cell migration                                  | 0.00195 |
| GO:0048333 | mesodermal cell differentiation                               | 0.00206 |
| GO:0048407 | platelet-derived growth factor binding                        | 0.00207 |
| GO:0003151 | outflow tract morphogenesis                                   | 0.00218 |
| GO:0001656 | metanephros development                                       | 0.00221 |
| GO:0034109 | homotypic cell-cell adhesion                                  | 0.00221 |
| GO:0046850 | regulation of bone remodeling                                 | 0.00225 |
| GO:0006022 | aminoglycan metabolic process                                 | 0.00243 |
| GO:0061135 | endopeptidase regulator activity                              | 0.00244 |
| GO:0002279 | mast cell activation involved in immune response              | 0.00244 |
| GO:0038065 | collagen-activated signaling pathway                          | 0.00245 |
| GO:0046545 | development of primary female sexual characteristics          | 0.00257 |
| GO:0048483 | autonomic nervous system development                          | 0.00262 |
| GO:0034330 | cell junction organization                                    | 0.00268 |
| GO:0110110 | positive regulation of animal organ morphogenesis             | 0.00277 |
| GO:0016702 | oxidoreductase activity, acting on single donors with incorp  | 0.00284 |
| GO:0060191 | regulation of lipase activity                                 | 0.00293 |
| GO:0061437 | renal system vasculature development                          | 0.00294 |
| GO:0061440 | kidney vasculature development                                | 0.00294 |
| GO:0070527 | platelet aggregation                                          | 0.00301 |
| GO:0002701 | negative regulation of production of molecular mediator of    | 0.00304 |
| GO:0032965 | regulation of collagen biosynthetic process                   | 0.00304 |
| GO:0090049 | regulation of cell migration involved in sprouting angiogen   | 0.00304 |

|            |                                                                |         |
|------------|----------------------------------------------------------------|---------|
| GO:0007178 | transmembrane receptor protein serine/threonine kinase sig     | 0.00324 |
| GO:0010950 | positive regulation of endopeptidase activity                  | 0.00329 |
| GO:0051055 | negative regulation of lipid biosynthetic process              | 0.0033  |
| GO:0090136 | epithelial cell-cell adhesion                                  | 0.0033  |
| GO:0060393 | regulation of pathway-restricted SMAD protein phosphoryl       | 0.00331 |
| GO:0051090 | regulation of DNA-binding transcription factor activity        | 0.00338 |
| GO:1901681 | sulfur compound binding                                        | 0.00347 |
| GO:0014910 | regulation of smooth muscle cell migration                     | 0.00347 |
| GO:0006810 | transport                                                      | 0.00361 |
| GO:0061005 | cell differentiation involved in kidney development            | 0.00365 |
| GO:2001056 | positive regulation of cysteine-type endopeptidase activity    | 0.00388 |
| GO:0035023 | regulation of Rho protein signal transduction                  | 0.00388 |
| GO:0060389 | pathway-restricted SMAD protein phosphorylation                | 0.00389 |
| GO:0090050 | positive regulation of cell migration involved in sprouting a  | 0.00396 |
| GO:0016701 | oxidoreductase activity, acting on single donors with incorp   | 0.00423 |
| GO:0032526 | response to retinoic acid                                      | 0.0043  |
| GO:0030858 | positive regulation of epithelial cell differentiation         | 0.00434 |
| GO:0060135 | maternal process involved in female pregnancy                  | 0.00434 |
| GO:0051057 | positive regulation of small GTPase mediated signal transdi    | 0.0044  |
| GO:0098581 | detection of external biotic stimulus                          | 0.00441 |
| GO:0001912 | positive regulation of leukocyte mediated cytotoxicity         | 0.00445 |
| GO:0007219 | Notch signaling pathway                                        | 0.00445 |
| GO:0045453 | bone resorption                                                | 0.00446 |
| GO:0010952 | positive regulation of peptidase activity                      | 0.00449 |
| GO:0001787 | natural killer cell proliferation                              | 0.0045  |
| GO:0010543 | regulation of platelet activation                              | 0.00451 |
| GO:0007584 | response to nutrient                                           | 0.00452 |
| GO:1904894 | positive regulation of STAT cascade                            | 0.00454 |
| GO:0001945 | lymph vessel development                                       | 0.00459 |
| GO:0098751 | bone cell development                                          | 0.00462 |
| GO:0043394 | proteoglycan binding                                           | 0.00479 |
| GO:0005614 | interstitial matrix                                            | 0.00495 |
| GO:0005925 | focal adhesion                                                 | 0.00502 |
| GO:0014066 | regulation of phosphatidylinositol 3-kinase signaling          | 0.00506 |
| GO:0060840 | artery development                                             | 0.00517 |
| GO:0033691 | sialic acid binding                                            | 0.0052  |
| GO:0007266 | Rho protein signal transduction                                | 0.00541 |
| GO:0046683 | response to organophosphorus                                   | 0.00541 |
| GO:1901699 | cellular response to nitrogen compound                         | 0.00555 |
| GO:0003206 | cardiac chamber morphogenesis                                  | 0.00555 |
| GO:0007015 | actin filament organization                                    | 0.00563 |
| GO:1903672 | positive regulation of sprouting angiogenesis                  | 0.00563 |
| GO:2000826 | regulation of heart morphogenesis                              | 0.00563 |
| GO:1905563 | negative regulation of vascular endothelial cell proliferation | 0.00566 |
| GO:0002370 | natural killer cell cytokine production                        | 0.00567 |
| GO:0002727 | regulation of natural killer cell cytokine production          | 0.00567 |
| GO:0050839 | cell adhesion molecule binding                                 | 0.00575 |
| GO:0002886 | regulation of myeloid leukocyte mediated immunity              | 0.00579 |
| GO:0043536 | positive regulation of blood vessel endothelial cell migratio  | 0.00579 |
| GO:0010544 | negative regulation of platelet activation                     | 0.00579 |
| GO:0005924 | cell-substrate adherens junction                               | 0.00604 |
| GO:0004866 | endopeptidase inhibitor activity                               | 0.00611 |
| GO:0090092 | regulation of transmembrane receptor protein serine/threon     | 0.00613 |
| GO:0030500 | regulation of bone mineralization                              | 0.00624 |
| GO:0030055 | cell-substrate junction                                        | 0.00633 |
| GO:0016043 | cellular component organization                                | 0.00635 |
| GO:0031622 | positive regulation of fever generation                        | 0.0065  |
| GO:0044691 | tooth eruption                                                 | 0.0065  |
| GO:0032740 | positive regulation of interleukin-17 production               | 0.0065  |
| GO:0010810 | regulation of cell-substrate adhesion                          | 0.00651 |
| GO:0043009 | chordate embryonic development                                 | 0.00664 |
| GO:0034105 | positive regulation of tissue remodeling                       | 0.00666 |
| GO:0071417 | cellular response to organonitrogen compound                   | 0.00672 |
| GO:0033089 | positive regulation of T cell differentiation in thymus        | 0.00682 |
| GO:0097035 | regulation of membrane lipid distribution                      | 0.00682 |
| GO:0048566 | embryonic digestive tract development                          | 0.00685 |
| GO:0070169 | positive regulation of biomineral tissue development           | 0.00694 |
| GO:1901652 | response to peptide                                            | 0.00728 |
| GO:0001570 | vasculogenesis                                                 | 0.00743 |
| GO:0008237 | metallopeptidase activity                                      | 0.00752 |
| GO:0005178 | integrin binding                                               | 0.00755 |
| GO:0005161 | platelet-derived growth factor receptor binding                | 0.00766 |

|            |                                                               |         |
|------------|---------------------------------------------------------------|---------|
| GO:0046579 | positive regulation of Ras protein signal transduction        | 0.00774 |
| GO:0001701 | in utero embryonic development                                | 0.00778 |
| GO:0032623 | interleukin-2 production                                      | 0.00782 |
| GO:0032663 | regulation of interleukin-2 production                        | 0.00782 |
| GO:0006687 | glycosphingolipid metabolic process                           | 0.00782 |
| GO:0030414 | peptidase inhibitor activity                                  | 0.00787 |
| GO:0051056 | regulation of small GTPase mediated signal transduction       | 0.00793 |
| GO:0035590 | purinergic nucleotide receptor signaling pathway              | 0.00815 |
| GO:0045995 | regulation of embryonic development                           | 0.00823 |
| GO:0046330 | positive regulation of JNK cascade                            | 0.00823 |
| GO:1901222 | regulation of NIK/NF-kappaB signaling                         | 0.00833 |
| GO:1903510 | mucopolysaccharide metabolic process                          | 0.00833 |
| GO:0001946 | lymphangiogenesis                                             | 0.00841 |
| GO:0016045 | detection of bacterium                                        | 0.00841 |
| GO:0034134 | toll-like receptor 2 signaling pathway                        | 0.00841 |
| GO:0048844 | artery morphogenesis                                          | 0.00871 |
| GO:0045137 | development of primary sexual characteristics                 | 0.00889 |
| GO:0045833 | negative regulation of lipid metabolic process                | 0.00898 |
| GO:0007498 | mesoderm development                                          | 0.0091  |
| GO:0035850 | epithelial cell differentiation involved in kidney developme  | 0.0091  |
| GO:0055123 | digestive system development                                  | 0.0095  |
| GO:0099515 | actin filament-based transport                                | 0.0095  |
| GO:0034135 | regulation of toll-like receptor 2 signaling pathway          | 0.0095  |
| GO:0070493 | thrombin-activated receptor signaling pathway                 | 0.0095  |
| GO:0060021 | roof of mouth development                                     | 0.00959 |
| GO:0032970 | regulation of actin filament-based process                    | 0.00967 |
| GO:0061515 | myeloid cell development                                      | 0.00967 |
| GO:0071300 | cellular response to retinoic acid                            | 0.00967 |
| GO:0048546 | digestive tract morphogenesis                                 | 0.00997 |
| GO:0060443 | mammary gland morphogenesis                                   | 0.00997 |
| GO:0034204 | lipid translocation                                           | 0.01005 |
| GO:0071260 | cellular response to mechanical stimulus                      | 0.01012 |
| GO:0046427 | positive regulation of JAK-STAT cascade                       | 0.01012 |
| GO:0009792 | embryo development ending in birth or egg hatching            | 0.01012 |
| GO:0003205 | cardiac chamber development                                   | 0.01028 |
| GO:0035587 | purinergic receptor signaling pathway                         | 0.01066 |
| GO:0030234 | enzyme regulator activity                                     | 0.01084 |
| GO:0070302 | regulation of stress-activated protein kinase signaling casca | 0.01095 |
| GO:0014074 | response to purine-containing compound                        | 0.01151 |
| GO:0001990 | regulation of systemic arterial blood pressure by hormone     | 0.01177 |
| GO:0008047 | enzyme activator activity                                     | 0.01197 |
| GO:0002260 | lymphocyte homeostasis                                        | 0.01227 |
| GO:0009128 | purine nucleoside monophosphate catabolic process             | 0.01228 |
| GO:0072109 | glomerular mesangium development                              | 0.01228 |
| GO:0051130 | positive regulation of cellular component organization        | 0.01232 |
| GO:0032814 | regulation of natural killer cell activation                  | 0.01267 |
| GO:0030246 | carbohydrate binding                                          | 0.01302 |
| GO:0004954 | prostanoid receptor activity                                  | 0.01302 |
| GO:0097493 | structural molecule activity conferring elasticity            | 0.01302 |
| GO:1903845 | negative regulation of cellular response to transforming gro  | 0.01305 |
| GO:0031915 | positive regulation of synaptic plasticity                    | 0.01305 |
| GO:0046643 | regulation of gamma-delta T cell activation                   | 0.01305 |
| GO:0008064 | regulation of actin polymerization or depolymerization        | 0.01319 |
| GO:0043552 | positive regulation of phosphatidylinositol 3-kinase activity | 0.01353 |
| GO:0006968 | cellular defense response                                     | 0.01361 |
| GO:0097366 | response to bronchodilator                                    | 0.01361 |
| GO:0008289 | lipid binding                                                 | 0.01394 |
| GO:0046629 | gamma-delta T cell activation                                 | 0.014   |
| GO:0007548 | sex differentiation                                           | 0.0141  |
| GO:0001773 | myeloid dendritic cell activation                             | 0.01424 |
| GO:0038111 | interleukin-7-mediated signaling pathway                      | 0.01424 |
| GO:0043304 | regulation of mast cell degranulation                         | 0.01424 |
| GO:0061311 | cell surface receptor signaling pathway involved in heart de  | 0.01424 |
| GO:0046636 | negative regulation of alpha-beta T cell activation           | 0.01429 |
| GO:0043168 | anion binding                                                 | 0.01431 |
| GO:0032355 | response to estradiol                                         | 0.01454 |
| GO:0003272 | endocardial cushion formation                                 | 0.01473 |
| GO:0009595 | detection of biotic stimulus                                  | 0.01473 |
| GO:0034123 | positive regulation of toll-like receptor signaling pathway   | 0.01473 |
| GO:0090025 | regulation of monocyte chemotaxis                             | 0.01473 |
| GO:0030832 | regulation of actin filament length                           | 0.01474 |
| GO:0008585 | female gonad development                                      | 0.01496 |



|            |                                                               |         |
|------------|---------------------------------------------------------------|---------|
| GO:0045332 | phospholipid translocation                                    | 0.01496 |
| GO:0043525 | positive regulation of neuron apoptotic process               | 0.01524 |
| GO:0014031 | mesenchymal cell development                                  | 0.01548 |
| GO:0008154 | actin polymerization or depolymerization                      | 0.01548 |
| GO:0071559 | response to transforming growth factor beta                   | 0.01548 |
| GO:0001974 | blood vessel remodeling                                       | 0.01548 |
| GO:0014911 | positive regulation of smooth muscle cell migration           | 0.01548 |
| GO:0045777 | positive regulation of blood pressure                         | 0.01548 |
| GO:0090287 | regulation of cellular response to growth factor stimulus     | 0.01556 |
| GO:0016174 | NAD(P)H oxidase activity                                      | 0.01601 |
| GO:0030023 | extracellular matrix constituent conferring elasticity        | 0.01601 |
| GO:0090101 | negative regulation of transmembrane receptor protein serin   | 0.01639 |
| GO:0060411 | cardiac septum morphogenesis                                  | 0.01639 |
| GO:0009725 | response to hormone                                           | 0.01691 |
| GO:0006027 | glycosaminoglycan catabolic process                           | 0.01691 |
| GO:0033273 | response to vitamin                                           | 0.01691 |
| GO:0048010 | vascular endothelial growth factor receptor signaling pathw   | 0.01691 |
| GO:0002729 | positive regulation of natural killer cell cytokine productio | 0.01719 |
| GO:0071493 | cellular response to UV-B                                     | 0.01719 |
| GO:0006909 | phagocytosis                                                  | 0.01739 |
| GO:0015914 | phospholipid transport                                        | 0.01757 |
| GO:0048332 | mesoderm morphogenesis                                        | 0.01757 |
| GO:0002551 | mast cell chemotaxis                                          | 0.01757 |
| GO:0032372 | negative regulation of sterol transport                       | 0.01757 |
| GO:0032375 | negative regulation of cholesterol transport                  | 0.01757 |
| GO:0033079 | immature T cell proliferation                                 | 0.01757 |
| GO:0070243 | regulation of thymocyte apoptotic process                     | 0.01757 |
| GO:0010811 | positive regulation of cell-substrate adhesion                | 0.01777 |
| GO:0043028 | cysteine-type endopeptidase regulator activity involved in a  | 0.0178  |
| GO:0005021 | vascular endothelial growth factor-activated receptor activi  | 0.0178  |
| GO:0030041 | actin filament polymerization                                 | 0.01833 |
| GO:0009268 | response to pH                                                | 0.0184  |
| GO:0032872 | regulation of stress-activated MAPK cascade                   | 0.01852 |
| GO:0061008 | hepaticobiliary system development                            | 0.01883 |
| GO:0071772 | response to BMP                                               | 0.01883 |
| GO:0071773 | cellular response to BMP stimulus                             | 0.01883 |
| GO:0031098 | stress-activated protein kinase signaling cascade             | 0.01883 |
| GO:0031638 | zymogen activation                                            | 0.01883 |
| GO:1904705 | regulation of vascular smooth muscle cell proliferation       | 0.01883 |
| GO:1990874 | vascular smooth muscle cell proliferation                     | 0.01883 |
| GO:0000146 | microfilament motor activity                                  | 0.01884 |
| GO:0061028 | establishment of endothelial barrier                          | 0.01891 |
| GO:0006919 | activation of cysteine-type endopeptidase activity involved   | 0.01901 |
| GO:0014033 | neural crest cell differentiation                             | 0.01901 |
| GO:0071560 | cellular response to transforming growth factor beta stimul   | 0.01919 |
| GO:0015748 | organophosphate ester transport                               | 0.01934 |
| GO:0033006 | regulation of mast cell activation involved in immune respc   | 0.01938 |
| GO:1903319 | positive regulation of protein maturation                     | 0.01938 |
| GO:0032956 | regulation of actin cytoskeleton organization                 | 0.01959 |
| GO:0036035 | osteoclast development                                        | 0.02031 |
| GO:0070431 | nucleotide-binding oligomerization domain containing 2 sig    | 0.02031 |
| GO:0072044 | collecting duct development                                   | 0.02031 |
| GO:0001784 | phosphotyrosine residue binding                               | 0.02034 |
| GO:0006196 | AMP catabolic process                                         | 0.02057 |
| GO:0014805 | smooth muscle adaptation                                      | 0.02057 |
| GO:0014900 | muscle hyperplasia                                            | 0.02057 |
| GO:0019322 | pentose biosynthetic process                                  | 0.02057 |
| GO:0051754 | meiotic sister chromatid cohesion, centromeric                | 0.02057 |
| GO:0061591 | calcium activated galactosylceramide scrambling               | 0.02057 |
| GO:0071603 | endothelial cell-cell adhesion                                | 0.02057 |
| GO:0032911 | negative regulation of transforming growth factor beta1 pro   | 0.02065 |
| GO:0034136 | negative regulation of toll-like receptor 2 signaling pathway | 0.02065 |
| GO:0035234 | ectopic germ cell programmed cell death                       | 0.02065 |
| GO:0035744 | T-helper 1 cell cytokine production                           | 0.02065 |
| GO:0072008 | glomerular mesangial cell differentiation                     | 0.02065 |
| GO:1900748 | positive regulation of vascular endothelial growth factor sig | 0.02065 |
| GO:2000554 | regulation of T-helper 1 cell cytokine production             | 0.02065 |
| GO:2000556 | positive regulation of T-helper 1 cell cytokine production    | 0.02065 |
| GO:0030833 | regulation of actin filament polymerization                   | 0.02065 |
| GO:0090288 | negative regulation of cellular response to growth factor sti | 0.02065 |
| GO:0001889 | liver development                                             | 0.02077 |
| GO:0001755 | neural crest cell migration                                   | 0.02077 |

|            |                                                              |         |
|------------|--------------------------------------------------------------|---------|
| GO:0003081 | regulation of systemic arterial blood pressure by renin-angi | 0.02109 |
| GO:0050995 | negative regulation of lipid catabolic process               | 0.02109 |
| GO:0006024 | glycosaminoglycan biosynthetic process                       | 0.02109 |
| GO:0030728 | ovulation                                                    | 0.02116 |
| GO:0032717 | negative regulation of interleukin-8 production              | 0.02116 |
| GO:0032930 | positive regulation of superoxide anion generation           | 0.02116 |
| GO:0048745 | smooth muscle tissue development                             | 0.02116 |
| GO:0046677 | response to antibiotic                                       | 0.02139 |
| GO:0002320 | lymphoid progenitor cell differentiation                     | 0.02142 |
| GO:0051403 | stress-activated MAPK cascade                                | 0.02158 |
| GO:0045622 | regulation of T-helper cell differentiation                  | 0.02167 |
| GO:0060412 | ventricular septum morphogenesis                             | 0.02167 |
| GO:2000177 | regulation of neural precursor cell proliferation            | 0.02182 |
| GO:0042445 | hormone metabolic process                                    | 0.02226 |
| GO:0003231 | cardiac ventricle development                                | 0.02225 |
| GO:0014032 | neural crest cell development                                | 0.02297 |
| GO:0002715 | regulation of natural killer cell mediated immunity          | 0.02297 |
| GO:0003197 | endocardial cushion development                              | 0.02297 |
| GO:1903053 | regulation of extracellular matrix organization              | 0.02297 |
| GO:0042542 | response to hydrogen peroxide                                | 0.0232  |
| GO:0001707 | mesoderm formation                                           | 0.02328 |
| GO:0001885 | endothelial cell development                                 | 0.02328 |
| GO:0042698 | ovulation cycle                                              | 0.02328 |
| GO:0045834 | positive regulation of lipid metabolic process               | 0.02329 |
| GO:0032620 | interleukin-17 production                                    | 0.02364 |
| GO:0032660 | regulation of interleukin-17 production                      | 0.02364 |
| GO:0048048 | embryonic eye morphogenesis                                  | 0.02364 |
| GO:1904707 | positive regulation of vascular smooth muscle cell prolifera | 0.02364 |
| GO:1901888 | regulation of cell junction assembly                         | 0.02367 |
| GO:0016459 | myosin complex                                               | 0.02379 |
| GO:0001772 | immunological synapse                                        | 0.02379 |
| GO:0003779 | actin binding                                                | 0.02429 |
| GO:0005044 | scavenger receptor activity                                  | 0.02429 |
| GO:0032757 | positive regulation of interleukin-8 production              | 0.02436 |
| GO:0001660 | fever generation                                             | 0.02436 |
| GO:0031652 | positive regulation of heat generation                       | 0.02436 |
| GO:0033080 | immature T cell proliferation in thymus                      | 0.02436 |
| GO:0043589 | skin morphogenesis                                           | 0.02436 |
| GO:0060907 | positive regulation of macrophage cytokine production        | 0.02436 |
| GO:0061043 | regulation of vascular wound healing                         | 0.02436 |
| GO:0072205 | metanephric collecting duct development                      | 0.02436 |
| GO:2001204 | regulation of osteoclast development                         | 0.02436 |
| GO:0043551 | regulation of phosphatidylinositol 3-kinase activity         | 0.02526 |
| GO:0072577 | endothelial cell apoptotic process                           | 0.02526 |
| GO:0060627 | regulation of vesicle-mediated transport                     | 0.02533 |
| GO:0019835 | cytolysis                                                    | 0.02533 |
| GO:0071711 | basement membrane organization                               | 0.02533 |
| GO:0030898 | actin-dependent ATPase activity                              | 0.02568 |
| GO:0005520 | insulin-like growth factor binding                           | 0.02568 |
| GO:0006026 | aminoglycan catabolic process                                | 0.02597 |
| GO:0110053 | regulation of actin filament organization                    | 0.0261  |
| GO:0050830 | defense response to Gram-positive bacterium                  | 0.02656 |
| GO:0030512 | negative regulation of transforming growth factor beta recej | 0.0267  |
| GO:0048705 | skeletal system morphogenesis                                | 0.02681 |
| GO:0005588 | collagen type V trimer                                       | 0.02728 |
| GO:0010954 | positive regulation of protein processing                    | 0.02736 |
| GO:0021879 | forebrain neuron differentiation                             | 0.02742 |
| GO:0001649 | osteoblast differentiation                                   | 0.02769 |
| GO:0048864 | stem cell development                                        | 0.02776 |
| GO:0016798 | hydrolase activity, acting on glycosyl bonds                 | 0.02806 |
| GO:0072132 | mesenchyme morphogenesis                                     | 0.02851 |
| GO:0070482 | response to oxygen levels                                    | 0.02851 |
| GO:0044853 | plasma membrane raft                                         | 0.02871 |
| GO:0001771 | immunological synapse formation                              | 0.02875 |
| GO:0003376 | sphingosine-1-phosphate receptor signaling pathway           | 0.02875 |
| GO:0009169 | purine ribonucleoside monophosphate catabolic process        | 0.02875 |
| GO:0031650 | regulation of heat generation                                | 0.02875 |
| GO:0060841 | venous blood vessel development                              | 0.02875 |
| GO:0097531 | mast cell migration                                          | 0.02875 |
| GO:0150078 | positive regulation of neuroinflammatory response            | 0.02875 |
| GO:0032703 | negative regulation of interleukin-2 production              | 0.02901 |
| GO:0045606 | positive regulation of epidermal cell differentiation        | 0.02901 |

|            |                                                                |         |
|------------|----------------------------------------------------------------|---------|
| GO:0051384 | response to glucocorticoid                                     | 0.02912 |
| GO:0009125 | nucleoside monophosphate catabolic process                     | 0.03043 |
| GO:0032928 | regulation of superoxide anion generation                      | 0.03043 |
| GO:0035988 | chondrocyte proliferation                                      | 0.03043 |
| GO:0060444 | branching involved in mammary gland duct morphogenesis         | 0.03043 |
| GO:0072574 | hepatocyte proliferation                                       | 0.03043 |
| GO:0072575 | epithelial cell proliferation involved in liver morphogenesis  | 0.03043 |
| GO:1902547 | regulation of cellular response to vascular endothelial grow   | 0.03043 |
| GO:0003203 | endocardial cushion morphogenesis                              | 0.03066 |
| GO:0070232 | regulation of T cell apoptotic process                         | 0.03066 |
| GO:0045603 | positive regulation of endothelial cell differentiation        | 0.03075 |
| GO:0060973 | cell migration involved in heart development                   | 0.03075 |
| GO:0033005 | positive regulation of mast cell activation                    | 0.03101 |
| GO:0045780 | positive regulation of bone resorption                         | 0.03101 |
| GO:0046852 | positive regulation of bone remodeling                         | 0.03101 |
| GO:0060231 | mesenchymal to epithelial transition                           | 0.03101 |
| GO:0072091 | regulation of stem cell proliferation                          | 0.03104 |
| GO:0008593 | regulation of Notch signaling pathway                          | 0.03104 |
| GO:0001659 | temperature homeostasis                                        | 0.0313  |
| GO:0006953 | acute-phase response                                           | 0.03178 |
| GO:0002686 | negative regulation of leukocyte migration                     | 0.03178 |
| GO:0098760 | response to interleukin-7                                      | 0.03178 |
| GO:0098761 | cellular response to interleukin-7                             | 0.03178 |
| GO:1905332 | positive regulation of morphogenesis of an epithelium          | 0.03178 |
| GO:0006023 | aminoglycan biosynthetic process                               | 0.03183 |
| GO:0051091 | positive regulation of DNA-binding transcription factor acti   | 0.03188 |
| GO:2000243 | positive regulation of reproductive process                    | 0.03265 |
| GO:0036293 | response to decreased oxygen levels                            | 0.03323 |
| GO:0004955 | prostaglandin receptor activity                                | 0.03337 |
| GO:0016803 | ether hydrolase activity                                       | 0.03337 |
| GO:0060251 | regulation of glial cell proliferation                         | 0.03359 |
| GO:0007265 | Ras protein signal transduction                                | 0.03401 |
| GO:0002765 | immune response-inhibiting signal transduction                 | 0.03425 |
| GO:0010887 | negative regulation of cholesterol storage                     | 0.03425 |
| GO:0031620 | regulation of fever generation                                 | 0.03425 |
| GO:0032817 | regulation of natural killer cell proliferation                | 0.03425 |
| GO:0045586 | regulation of gamma-delta T cell differentiation               | 0.03425 |
| GO:1901201 | regulation of extracellular matrix assembly                    | 0.03425 |
| GO:1904238 | pericyte cell differentiation                                  | 0.03425 |
| GO:1905522 | negative regulation of macrophage migration                    | 0.03425 |
| GO:2001187 | positive regulation of CD8-positive, alpha-beta T cell activat | 0.03425 |
| GO:0003170 | heart valve development                                        | 0.03505 |
| GO:0050854 | regulation of antigen receptor-mediated signaling pathway      | 0.03505 |
| GO:0072210 | metanephric nephron development                                | 0.03534 |
| GO:0008406 | gonad development                                              | 0.0356  |
| GO:0045236 | CXCR chemokine receptor binding                                | 0.03583 |
| GO:0002020 | protease binding                                               | 0.03599 |
| GO:0002360 | T cell lineage commitment                                      | 0.03637 |
| GO:0045577 | regulation of B cell differentiation                           | 0.03637 |
| GO:0048147 | negative regulation of fibroblast proliferation                | 0.03637 |
| GO:0050858 | negative regulation of antigen receptor-mediated signaling     | 0.03637 |
| GO:0090303 | positive regulation of wound healing                           | 0.03696 |
| GO:0050922 | negative regulation of chemotaxis                              | 0.03733 |
| GO:0001666 | response to hypoxia                                            | 0.03921 |
| GO:2000351 | regulation of endothelial cell apoptotic process               | 0.03928 |
| GO:0090218 | positive regulation of lipid kinase activity                   | 0.03944 |
| GO:0001958 | endochondral ossification                                      | 0.03944 |
| GO:0010714 | positive regulation of collagen metabolic process              | 0.03944 |
| GO:0036075 | replacement ossification                                       | 0.03944 |
| GO:0043032 | positive regulation of macrophage activation                   | 0.03944 |
| GO:0060706 | cell differentiation involved in embryonic placenta develop    | 0.03944 |
| GO:0015629 | actin cytoskeleton                                             | 0.03948 |
| GO:0001709 | cell fate determination                                        | 0.03984 |
| GO:0021983 | pituitary gland development                                    | 0.03984 |
| GO:0032924 | activin receptor signaling pathway                             | 0.03984 |
| GO:1901658 | glycosyl compound catabolic process                            | 0.03984 |
| GO:0048609 | multicellular organismal reproductive process                  | 0.0403  |
| GO:0004857 | enzyme inhibitor activity                                      | 0.04046 |
| GO:0072009 | nephron epithelium development                                 | 0.04113 |
| GO:0002430 | complement receptor mediated signaling pathway                 | 0.04175 |
| GO:0002863 | positive regulation of inflammatory response to antigenic st   | 0.04175 |
| GO:0014831 | gastro-intestinal system smooth muscle contraction             | 0.04175 |

|            |                                                               |         |
|------------|---------------------------------------------------------------|---------|
| GO:0032490 | detection of molecule of bacterial origin                     | 0.04175 |
| GO:0032966 | negative regulation of collagen biosynthetic process          | 0.04175 |
| GO:0033083 | regulation of immature T cell proliferation                   | 0.04175 |
| GO:0033629 | negative regulation of cell adhesion mediated by integrin     | 0.04175 |
| GO:0038063 | collagen-activated tyrosine kinase receptor signaling pathw   | 0.04175 |
| GO:0043383 | negative T cell selection                                     | 0.04175 |
| GO:0071635 | negative regulation of transforming growth factor beta prod   | 0.04175 |
| GO:1902337 | regulation of apoptotic process involved in morphogenesis     | 0.04175 |
| GO:1904748 | regulation of apoptotic process involved in development       | 0.04175 |
| GO:2001279 | regulation of unsaturated fatty acid biosynthetic process     | 0.04175 |
| GO:0003179 | heart valve morphogenesis                                     | 0.04175 |
| GO:0060350 | endochondral bone morphogenesis                               | 0.04175 |
| GO:0045992 | negative regulation of embryonic development                  | 0.04175 |
| GO:0051043 | regulation of membrane protein ectodomain proteolysis         | 0.04175 |
| GO:0071425 | hematopoietic stem cell proliferation                         | 0.04175 |
| GO:0072576 | liver morphogenesis                                           | 0.04175 |
| GO:0032732 | positive regulation of interleukin-1 production               | 0.04358 |
| GO:0061180 | mammary gland epithelium development                          | 0.04358 |
| GO:0038036 | sphingosine-1-phosphate receptor activity                     | 0.0436  |
| GO:0002534 | cytokine production involved in inflammatory response         | 0.04371 |
| GO:1900015 | regulation of cytokine production involved in inflammatory    | 0.04371 |
| GO:0033630 | positive regulation of cell adhesion mediated by integrin     | 0.04407 |
| GO:1900746 | regulation of vascular endothelial growth factor signaling p  | 0.04407 |
| GO:0042269 | regulation of natural killer cell mediated cytotoxicity       | 0.04425 |
| GO:0050856 | regulation of T cell receptor signaling pathway               | 0.04425 |
| GO:1904407 | positive regulation of nitric oxide metabolic process         | 0.04425 |
| GO:1905314 | semi-lunar valve development                                  | 0.04425 |
| GO:0060349 | bone morphogenesis                                            | 0.04453 |
| GO:1903725 | regulation of phospholipid metabolic process                  | 0.04453 |
| GO:0010934 | macrophage cytokine production                                | 0.04467 |
| GO:0010935 | regulation of macrophage cytokine production                  | 0.04467 |
| GO:0042574 | retinal metabolic process                                     | 0.04467 |
| GO:0045717 | negative regulation of fatty acid biosynthetic process        | 0.04467 |
| GO:0060099 | regulation of phagocytosis, engulfment                        | 0.04467 |
| GO:0004867 | serine-type endopeptidase inhibitor activity                  | 0.04473 |
| GO:0009158 | ribonucleoside monophosphate catabolic process                | 0.04483 |
| GO:0031649 | heat generation                                               | 0.04483 |
| GO:0035743 | CD4-positive, alpha-beta T cell cytokine production           | 0.04483 |
| GO:0070242 | thymocyte apoptotic process                                   | 0.04483 |
| GO:1904892 | regulation of STAT cascade                                    | 0.04505 |
| GO:0003279 | cardiac septum development                                    | 0.04511 |
| GO:0032535 | regulation of cellular component size                         | 0.04539 |
| GO:0046328 | regulation of JNK cascade                                     | 0.04543 |
| GO:0035270 | endocrine system development                                  | 0.04575 |
| GO:0060759 | regulation of response to cytokine stimulus                   | 0.04611 |
| GO:0001542 | ovulation from ovarian follicle                               | 0.04658 |
| GO:0001866 | NK T cell proliferation                                       | 0.04658 |
| GO:0002606 | positive regulation of dendritic cell antigen processing and  | 0.04658 |
| GO:0014827 | intestine smooth muscle contraction                           | 0.04658 |
| GO:0034354 | 'de novo' NAD biosynthetic process from tryptophan            | 0.04658 |
| GO:0035989 | tendon development                                            | 0.04658 |
| GO:0038001 | paracrine signaling                                           | 0.04658 |
| GO:0043376 | regulation of CD8-positive, alpha-beta T cell differentiation | 0.04658 |
| GO:0060369 | positive regulation of Fc receptor mediated stimulatory sigr  | 0.04658 |
| GO:0072007 | mesangial cell differentiation                                | 0.04658 |
| GO:0010574 | regulation of vascular endothelial growth factor production   | 0.04678 |
| GO:0060395 | SMAD protein signal transduction                              | 0.04696 |
| GO:0098651 | basement membrane collagen trimer                             | 0.04836 |
| GO:1902742 | apoptotic process involved in development                     | 0.04886 |

**GelMA\_HA No Trend Common**

|            |                                                  |          |
|------------|--------------------------------------------------|----------|
| GO:0002376 | immune system process                            | 1.92E-27 |
| GO:0002366 | leukocyte activation involved in immune response | 3.25E-23 |
| GO:0002263 | cell activation involved in immune response      | 5.17E-23 |
| GO:0045321 | leukocyte activation                             | 1.56E-21 |
| GO:0001775 | cell activation                                  | 6.56E-21 |
| GO:0006955 | immune response                                  | 1.75E-20 |
| GO:0002274 | myeloid leukocyte activation                     | 2.40E-20 |
| GO:0036230 | granulocyte activation                           | 2.56E-20 |
| GO:0002446 | neutrophil mediated immunity                     | 7.80E-20 |
| GO:0042119 | neutrophil activation                            | 7.80E-20 |
| GO:0043312 | neutrophil degranulation                         | 1.77E-19 |
| GO:0043299 | leukocyte degranulation                          | 1.85E-19 |

|            |                                                     |          |
|------------|-----------------------------------------------------|----------|
| GO:0002283 | neutrophil activation involved in immune response   | 1.85E-19 |
| GO:0002275 | myeloid cell activation involved in immune response | 2.18E-19 |
| GO:0002444 | myeloid leukocyte mediated immunity                 | 6.26E-19 |
| GO:0002443 | leukocyte mediated immunity                         | 2.17E-15 |
| GO:0006950 | response to stress                                  | 3.27E-14 |
| GO:0008283 | cell proliferation                                  | 6.51E-14 |
| GO:0002252 | immune effector process                             | 8.74E-14 |
| GO:0042127 | regulation of cell proliferation                    | 1.30E-13 |
| GO:0032496 | response to lipopolysaccharide                      | 7.98E-13 |
| GO:0002237 | response to molecule of bacterial origin            | 1.06E-12 |
| GO:0000779 | condensed chromosome, centromeric region            | 1.16E-12 |
| GO:0000323 | lytic vacuole                                       | 1.16E-12 |
| GO:0005764 | lysosome                                            | 1.16E-12 |
| GO:0002520 | immune system development                           | 1.57E-12 |
| GO:0050900 | leukocyte migration                                 | 2.25E-12 |
| GO:0034097 | response to cytokine                                | 4.95E-12 |
| GO:0002682 | regulation of immune system process                 | 5.71E-12 |
| GO:0002521 | leukocyte differentiation                           | 6.35E-12 |
| GO:0030595 | leukocyte chemotaxis                                | 7.67E-12 |
| GO:0048534 | hematopoietic or lymphoid organ development         | 8.52E-12 |
| GO:0071222 | cellular response to lipopolysaccharide             | 1.52E-11 |
| GO:0071345 | cellular response to cytokine stimulus              | 1.52E-11 |
| GO:0000775 | chromosome, centromeric region                      | 1.62E-11 |
| GO:0007059 | chromosome segregation                              | 1.68E-11 |
| GO:0007159 | leukocyte cell-cell adhesion                        | 1.76E-11 |
| GO:0030141 | secretory granule                                   | 3.81E-11 |
| GO:0097529 | myeloid leukocyte migration                         | 4.01E-11 |
| GO:0060326 | cell chemotaxis                                     | 4.64E-11 |
| GO:0071219 | cellular response to molecule of bacterial origin   | 6.18E-11 |
| GO:0000793 | condensed chromosome                                | 7.46E-11 |
| GO:0034341 | response to interferon-gamma                        | 1.32E-10 |
| GO:1903037 | regulation of leukocyte cell-cell adhesion          | 1.56E-10 |
| GO:0042110 | T cell activation                                   | 1.65E-10 |
| GO:0030097 | hemopoiesis                                         | 2.34E-10 |
| GO:0045055 | regulated exocytosis                                | 2.38E-10 |
| GO:0070062 | extracellular exosome                               | 2.44E-10 |
| GO:0032944 | regulation of mononuclear cell proliferation        | 2.82E-10 |
| GO:0022407 | regulation of cell-cell adhesion                    | 2.96E-10 |
| GO:1903561 | extracellular vesicle                               | 3.27E-10 |
| GO:0070663 | regulation of leukocyte proliferation               | 3.30E-10 |
| GO:0005773 | vacuole                                             | 3.33E-10 |
| GO:0043230 | extracellular organelle                             | 3.42E-10 |
| GO:0050670 | regulation of lymphocyte proliferation              | 4.56E-10 |
| GO:0006954 | inflammatory response                               | 5.32E-10 |
| GO:0071216 | cellular response to biotic stimulus                | 5.71E-10 |
| GO:0002685 | regulation of leukocyte migration                   | 5.75E-10 |
| GO:0000070 | mitotic sister chromatid segregation                | 6.81E-10 |
| GO:0008284 | positive regulation of cell proliferation           | 7.83E-10 |
| GO:1903039 | positive regulation of leukocyte cell-cell adhesion | 8.55E-10 |
| GO:0000819 | sister chromatid segregation                        | 9.23E-10 |
| GO:0044421 | extracellular region part                           | 1.06E-09 |
| GO:0005615 | extracellular space                                 | 1.18E-09 |
| GO:0050863 | regulation of T cell activation                     | 1.19E-09 |
| GO:0019221 | cytokine-mediated signaling pathway                 | 1.25E-09 |
| GO:0031982 | vesicle                                             | 2.11E-09 |
| GO:0002684 | positive regulation of immune system process        | 2.56E-09 |
| GO:0022409 | positive regulation of cell-cell adhesion           | 2.75E-09 |
| GO:0046649 | lymphocyte activation                               | 5.29E-09 |
| GO:0071346 | cellular response to interferon-gamma               | 5.37E-09 |
| GO:0050865 | regulation of cell activation                       | 6.17E-09 |
| GO:0044437 | vacuolar part                                       | 6.61E-09 |
| GO:0006952 | defense response                                    | 6.87E-09 |
| GO:0048522 | positive regulation of cellular process             | 8.82E-09 |
| GO:0097530 | granulocyte migration                               | 9.36E-09 |
| GO:0098813 | nuclear chromosome segregation                      | 1.27E-08 |
| GO:0006887 | exocytosis                                          | 1.29E-08 |
| GO:0001817 | regulation of cytokine production                   | 1.33E-08 |
| GO:0001816 | cytokine production                                 | 1.33E-08 |
| GO:0070661 | leukocyte proliferation                             | 1.41E-08 |
| GO:0048518 | positive regulation of biological process           | 1.41E-08 |
| GO:0050870 | positive regulation of T cell activation            | 1.57E-08 |
| GO:0070820 | tertiary granule                                    | 1.76E-08 |

|            |                                                                       |          |
|------------|-----------------------------------------------------------------------|----------|
| GO:1990266 | neutrophil migration                                                  | 2.31E-08 |
| GO:0002573 | myeloid leukocyte differentiation                                     | 3.18E-08 |
| GO:0032943 | mononuclear cell proliferation                                        | 3.26E-08 |
| GO:0045087 | innate immune response                                                | 3.64E-08 |
| GO:0005775 | vacuolar lumen                                                        | 3.76E-08 |
| GO:0042129 | regulation of T cell proliferation                                    | 3.79E-08 |
| GO:0030593 | neutrophil chemotaxis                                                 | 4.19E-08 |
| GO:0002694 | regulation of leukocyte activation                                    | 4.47E-08 |
| GO:0002687 | positive regulation of leukocyte migration                            | 5.54E-08 |
| GO:0031325 | positive regulation of cellular metabolic process                     | 7.51E-08 |
| GO:0046651 | lymphocyte proliferation                                              | 8.83E-08 |
| GO:0030667 | secretory granule membrane                                            | 1.01E-07 |
| GO:0040017 | positive regulation of locomotion                                     | 1.01E-07 |
| GO:0070887 | cellular response to chemical stimulus                                | 1.20E-07 |
| GO:0051272 | positive regulation of cellular component movement                    | 1.21E-07 |
| GO:2000147 | positive regulation of cell motility                                  | 1.40E-07 |
| GO:0044433 | cytoplasmic vesicle part                                              | 1.46E-07 |
| GO:0030155 | regulation of cell adhesion                                           | 1.51E-07 |
| GO:0071621 | granulocyte chemotaxis                                                | 1.69E-07 |
| GO:0051173 | positive regulation of nitrogen compound metabolic process            | 1.75E-07 |
| GO:0071674 | mononuclear cell migration                                            | 2.06E-07 |
| GO:0000280 | nuclear division                                                      | 2.14E-07 |
| GO:0008219 | cell death                                                            | 2.21E-07 |
| GO:0009893 | positive regulation of metabolic process                              | 2.39E-07 |
| GO:0030099 | myeloid cell differentiation                                          | 2.40E-07 |
| GO:0042098 | T cell proliferation                                                  | 2.42E-07 |
| GO:0033993 | response to lipid                                                     | 3.95E-07 |
| GO:0002819 | regulation of adaptive immune response                                | 3.98E-07 |
| GO:0012501 | programmed cell death                                                 | 4.35E-07 |
| GO:0072676 | lymphocyte migration                                                  | 4.38E-07 |
| GO:0043202 | lysosomal lumen                                                       | 4.48E-07 |
| GO:0099503 | secretory vesicle                                                     | 4.85E-07 |
| GO:0051249 | regulation of lymphocyte activation                                   | 6.07E-07 |
| GO:0080134 | regulation of response to stress                                      | 6.51E-07 |
| GO:0051704 | multi-organism process                                                | 6.84E-07 |
| GO:0030335 | positive regulation of cell migration                                 | 7.84E-07 |
| GO:0101002 | ficolin-1-rich granule                                                | 8.26E-07 |
| GO:1902105 | regulation of leukocyte differentiation                               | 8.80E-07 |
| GO:0009617 | response to bacterium                                                 | 9.04E-07 |
| GO:0048519 | negative regulation of biological process                             | 1.02E-06 |
| GO:0032946 | positive regulation of mononuclear cell proliferation                 | 1.14E-06 |
| GO:0060205 | cytoplasmic vesicle lumen                                             | 1.19E-06 |
| GO:0031983 | vesicle lumen                                                         | 1.36E-06 |
| GO:0010604 | positive regulation of macromolecule metabolic process                | 1.41E-06 |
| GO:0045785 | positive regulation of cell adhesion                                  | 1.44E-06 |
| GO:0050866 | negative regulation of cell activation                                | 1.69E-06 |
| GO:1902107 | positive regulation of leukocyte differentiation                      | 1.69E-06 |
| GO:0002688 | regulation of leukocyte chemotaxis                                    | 1.75E-06 |
| GO:0048523 | negative regulation of cellular process                               | 1.85E-06 |
| GO:0009607 | response to biotic stimulus                                           | 1.85E-06 |
| GO:0097708 | intracellular vesicle                                                 | 1.91E-06 |
| GO:0031410 | cytoplasmic vesicle                                                   | 1.94E-06 |
| GO:0051707 | response to other organism                                            | 1.99E-06 |
| GO:0032103 | positive regulation of response to external stimulus                  | 2.02E-06 |
| GO:0030217 | T cell differentiation                                                | 2.02E-06 |
| GO:0043207 | response to external biotic stimulus                                  | 2.12E-06 |
| GO:0034774 | secretory granule lumen                                               | 2.14E-06 |
| GO:0050671 | positive regulation of lymphocyte proliferation                       | 2.29E-06 |
| GO:0050867 | positive regulation of cell activation                                | 2.63E-06 |
| GO:0002822 | regulation of adaptive immune response based on somatic recombination | 3.45E-06 |
| GO:0071396 | cellular response to lipid                                            | 3.56E-06 |
| GO:0042581 | specific granule                                                      | 3.93E-06 |
| GO:0002695 | negative regulation of leukocyte activation                           | 4.12E-06 |
| GO:0001819 | positive regulation of cytokine production                            | 4.76E-06 |
| GO:0002285 | lymphocyte activation involved in immune response                     | 5.51E-06 |
| GO:0070665 | positive regulation of leukocyte proliferation                        | 5.70E-06 |
| GO:0070098 | chemokine-mediated signaling pathway                                  | 5.80E-06 |
| GO:0030098 | lymphocyte differentiation                                            | 6.21E-06 |
| GO:0005765 | lysosomal membrane                                                    | 6.45E-06 |
| GO:0098852 | lytic vacuole membrane                                                | 6.45E-06 |
| GO:0042362 | fat-soluble vitamin biosynthetic process                              | 6.55E-06 |
| GO:0002690 | positive regulation of leukocyte chemotaxis                           | 6.55E-06 |

|            |                                                             |          |
|------------|-------------------------------------------------------------|----------|
| GO:0031349 | positive regulation of defense response                     | 6.55E-06 |
| GO:0048584 | positive regulation of response to stimulus                 | 6.85E-06 |
| GO:0010941 | regulation of cell death                                    | 7.39E-06 |
| GO:0050764 | regulation of phagocytosis                                  | 8.72E-06 |
| GO:0042981 | regulation of apoptotic process                             | 9.76E-06 |
| GO:0010033 | response to organic substance                               | 9.79E-06 |
| GO:0002696 | positive regulation of leukocyte activation                 | 9.79E-06 |
| GO:0005766 | primary lysosome                                            | 9.79E-06 |
| GO:0042582 | azurophil granule                                           | 9.79E-06 |
| GO:0002548 | monocyte chemotaxis                                         | 1.02E-05 |
| GO:0000940 | condensed chromosome outer kinetochore                      | 1.02E-05 |
| GO:1901701 | cellular response to oxygen-containing compound             | 1.08E-05 |
| GO:0030316 | osteoclast differentiation                                  | 1.10E-05 |
| GO:1990868 | response to chemokine                                       | 1.10E-05 |
| GO:1990869 | cellular response to chemokine                              | 1.10E-05 |
| GO:0042102 | positive regulation of T cell proliferation                 | 1.14E-05 |
| GO:0072677 | eosinophil migration                                        | 1.16E-05 |
| GO:0042592 | homeostatic process                                         | 1.28E-05 |
| GO:0034381 | plasma lipoprotein particle clearance                       | 1.36E-05 |
| GO:0006915 | apoptotic process                                           | 1.43E-05 |
| GO:0051251 | positive regulation of lymphocyte activation                | 1.46E-05 |
| GO:0002224 | toll-like receptor signaling pathway                        | 1.47E-05 |
| GO:1903706 | regulation of hemopoiesis                                   | 1.47E-05 |
| GO:0070371 | ERK1 and ERK2 cascade                                       | 1.62E-05 |
| GO:0002699 | positive regulation of immune effector process              | 1.72E-05 |
| GO:0002706 | regulation of lymphocyte mediated immunity                  | 1.79E-05 |
| GO:0002703 | regulation of leukocyte mediated immunity                   | 1.79E-05 |
| GO:0050921 | positive regulation of chemotaxis                           | 2.02E-05 |
| GO:0070664 | negative regulation of leukocyte proliferation              | 2.21E-05 |
| GO:0043067 | regulation of programmed cell death                         | 2.27E-05 |
| GO:0072678 | T cell migration                                            | 2.30E-05 |
| GO:0046903 | secretion                                                   | 2.31E-05 |
| GO:1901700 | response to oxygen-containing compound                      | 2.34E-05 |
| GO:0032615 | interleukin-12 production                                   | 2.35E-05 |
| GO:0032655 | regulation of interleukin-12 production                     | 2.35E-05 |
| GO:0045621 | positive regulation of lymphocyte differentiation           | 2.35E-05 |
| GO:0001906 | cell killing                                                | 2.98E-05 |
| GO:0042368 | vitamin D biosynthetic process                              | 3.14E-05 |
| GO:0071310 | cellular response to organic substance                      | 3.16E-05 |
| GO:0045582 | positive regulation of T cell differentiation               | 3.68E-05 |
| GO:0045088 | regulation of innate immune response                        | 3.81E-05 |
| GO:1903708 | positive regulation of hemopoiesis                          | 3.92E-05 |
| GO:0032635 | interleukin-6 production                                    | 3.92E-05 |
| GO:0032675 | regulation of interleukin-6 production                      | 3.92E-05 |
| GO:0046631 | alpha-beta T cell activation                                | 3.95E-05 |
| GO:0008009 | chemokine activity                                          | 4.30E-05 |
| GO:0050776 | regulation of immune response                               | 4.51E-05 |
| GO:0050766 | positive regulation of phagocytosis                         | 5.38E-05 |
| GO:0032640 | tumor necrosis factor production                            | 5.86E-05 |
| GO:0032680 | regulation of tumor necrosis factor production              | 5.86E-05 |
| GO:0032940 | secretion by cell                                           | 5.86E-05 |
| GO:0031347 | regulation of defense response                              | 5.86E-05 |
| GO:0051250 | negative regulation of lymphocyte activation                | 6.18E-05 |
| GO:0071706 | tumor necrosis factor superfamily cytokine production       | 6.56E-05 |
| GO:1903555 | regulation of tumor necrosis factor superfamily cytokine pr | 6.56E-05 |
| GO:0050920 | regulation of chemotaxis                                    | 6.82E-05 |
| GO:0070372 | regulation of ERK1 and ERK2 cascade                         | 7.40E-05 |
| GO:0051383 | kinetochore organization                                    | 7.53E-05 |
| GO:0032642 | regulation of chemokine production                          | 7.77E-05 |
| GO:0043281 | regulation of cysteine-type endopeptidase activity involved | 7.95E-05 |
| GO:0048247 | lymphocyte chemotaxis                                       | 9.07E-05 |
| GO:0032609 | interferon-gamma production                                 | 9.41E-05 |
| GO:0007010 | cytoskeleton organization                                   | 9.52E-05 |
| GO:0051983 | regulation of chromosome segregation                        | 9.58E-05 |
| GO:0032602 | chemokine production                                        | 9.92E-05 |
| GO:0001818 | negative regulation of cytokine production                  | 9.93E-05 |
| GO:0007568 | aging                                                       | 9.93E-05 |
| GO:0043085 | positive regulation of catalytic activity                   | 0.00012  |
| GO:0060558 | regulation of calcidiol 1-monoxygenase activity             | 0.00012  |
| GO:0042116 | macrophage activation                                       | 0.00012  |
| GO:0150077 | regulation of neuroinflammatory response                    | 0.00013  |
| GO:0022408 | negative regulation of cell-cell adhesion                   | 0.00013  |

|            |                                                                   |         |
|------------|-------------------------------------------------------------------|---------|
| GO:0046632 | alpha-beta T cell differentiation                                 | 0.00014 |
| GO:0060556 | regulation of vitamin D biosynthetic process                      | 0.00015 |
| GO:0043367 | CD4-positive, alpha-beta T cell differentiation                   | 0.00015 |
| GO:0101003 | ficolin-1-rich granule membrane                                   | 0.00016 |
| GO:0097237 | cellular response to toxic substance                              | 0.00017 |
| GO:0070821 | tertiary granule membrane                                         | 0.00018 |
| GO:0032649 | regulation of interferon-gamma production                         | 0.00018 |
| GO:0045335 | phagocytic vesicle                                                | 0.00018 |
| GO:1901136 | carbohydrate derivative catabolic process                         | 0.00018 |
| GO:0045089 | positive regulation of innate immune response                     | 0.00019 |
| GO:0050672 | negative regulation of lymphocyte proliferation                   | 0.0002  |
| GO:0032270 | positive regulation of cellular protein metabolic process         | 0.0002  |
| GO:0008285 | negative regulation of cell proliferation                         | 0.00021 |
| GO:0046635 | positive regulation of alpha-beta T cell activation               | 0.00022 |
| GO:0071402 | cellular response to lipoprotein particle stimulus                | 0.00023 |
| GO:0032613 | interleukin-10 production                                         | 0.00023 |
| GO:0032653 | regulation of interleukin-10 production                           | 0.00023 |
| GO:1905517 | macrophage migration                                              | 0.00023 |
| GO:0002456 | T cell mediated immunity                                          | 0.00024 |
| GO:0019915 | lipid storage                                                     | 0.00025 |
| GO:0034644 | cellular response to UV                                           | 0.00025 |
| GO:0032945 | negative regulation of mononuclear cell proliferation             | 0.00025 |
| GO:0035710 | CD4-positive, alpha-beta T cell activation                        | 0.00029 |
| GO:0045730 | respiratory burst                                                 | 0.00031 |
| GO:0050790 | regulation of catalytic activity                                  | 0.00032 |
| GO:2000116 | regulation of cysteine-type endopeptidase activity                | 0.00032 |
| GO:0000778 | condensed nuclear chromosome kinetochore                          | 0.00034 |
| GO:0000780 | condensed nuclear chromosome, centromeric region                  | 0.00034 |
| GO:2000816 | negative regulation of mitotic sister chromatid separation        | 0.00034 |
| GO:0032695 | negative regulation of interleukin-12 production                  | 0.00034 |
| GO:0007162 | negative regulation of cell adhesion                              | 0.00038 |
| GO:0055094 | response to lipoprotein particle                                  | 0.00039 |
| GO:0045619 | regulation of lymphocyte differentiation                          | 0.00039 |
| GO:0051338 | regulation of transferase activity                                | 0.00041 |
| GO:0001909 | leukocyte mediated cytotoxicity                                   | 0.00041 |
| GO:0001932 | regulation of protein phosphorylation                             | 0.00042 |
| GO:0031663 | lipopolysaccharide-mediated signaling pathway                     | 0.00042 |
| GO:0043410 | positive regulation of MAPK cascade                               | 0.00042 |
| GO:0009636 | response to toxic substance                                       | 0.00046 |
| GO:0030139 | endocytic vesicle                                                 | 0.00047 |
| GO:0051306 | mitotic sister chromatid separation                               | 0.00047 |
| GO:1903038 | negative regulation of leukocyte cell-cell adhesion               | 0.00048 |
| GO:0042325 | regulation of phosphorylation                                     | 0.00049 |
| GO:0097006 | regulation of plasma lipoprotein particle levels                  | 0.0005  |
| GO:0034599 | cellular response to oxidative stress                             | 0.00052 |
| GO:0010985 | negative regulation of lipoprotein particle clearance             | 0.00052 |
| GO:0001934 | positive regulation of protein phosphorylation                    | 0.00052 |
| GO:0019377 | glycolipid catabolic process                                      | 0.00056 |
| GO:0070374 | positive regulation of ERK1 and ERK2 cascade                      | 0.00056 |
| GO:0045580 | regulation of T cell differentiation                              | 0.00057 |
| GO:0051247 | positive regulation of protein metabolic process                  | 0.00057 |
| GO:0043066 | negative regulation of apoptotic process                          | 0.00057 |
| GO:0050778 | positive regulation of immune response                            | 0.00057 |
| GO:0045841 | negative regulation of mitotic metaphase/anaphase transition      | 0.00057 |
| GO:0060548 | negative regulation of cell death                                 | 0.0006  |
| GO:0030855 | epithelial cell differentiation                                   | 0.0006  |
| GO:0002286 | T cell activation involved in immune response                     | 0.00062 |
| GO:0051716 | cellular response to stimulus                                     | 0.00064 |
| GO:0010878 | cholesterol storage                                               | 0.00065 |
| GO:0043069 | negative regulation of programmed cell death                      | 0.00065 |
| GO:0010562 | positive regulation of phosphorus metabolic process               | 0.00065 |
| GO:0045937 | positive regulation of phosphate metabolic process                | 0.00065 |
| GO:0002761 | regulation of myeloid leukocyte differentiation                   | 0.00066 |
| GO:0050868 | negative regulation of T cell activation                          | 0.00066 |
| GO:1905819 | negative regulation of chromosome separation                      | 0.00066 |
| GO:0002824 | positive regulation of adaptive immune response based on s        | 0.00066 |
| GO:2000516 | positive regulation of CD4-positive, alpha-beta T cell activation | 0.00066 |
| GO:0012506 | vesicle membrane                                                  | 0.00068 |
| GO:0030071 | regulation of mitotic metaphase/anaphase transition               | 0.0007  |
| GO:0031401 | positive regulation of protein modification process               | 0.0007  |
| GO:1902533 | positive regulation of intracellular signal transduction          | 0.0007  |
| GO:0035579 | specific granule membrane                                         | 0.00071 |



|            |                                                               |         |
|------------|---------------------------------------------------------------|---------|
| GO:0052547 | regulation of peptidase activity                              | 0.00071 |
| GO:0010965 | regulation of mitotic sister chromatid separation             | 0.00073 |
| GO:0045604 | regulation of epidermal cell differentiation                  | 0.00073 |
| GO:0002697 | regulation of immune effector process                         | 0.00074 |
| GO:0043408 | regulation of MAPK cascade                                    | 0.00074 |
| GO:0045859 | regulation of protein kinase activity                         | 0.00075 |
| GO:0002821 | positive regulation of adaptive immune response               | 0.00075 |
| GO:0002335 | mature B cell differentiation                                 | 0.00076 |
| GO:0032963 | collagen metabolic process                                    | 0.00079 |
| GO:0010883 | regulation of lipid storage                                   | 0.0008  |
| GO:0046479 | glycosphingolipid catabolic process                           | 0.00084 |
| GO:0042327 | positive regulation of phosphorylation                        | 0.00084 |
| GO:0050730 | regulation of peptidyl-tyrosine phosphorylation               | 0.00086 |
| GO:0002683 | negative regulation of immune system process                  | 0.00086 |
| GO:0043372 | positive regulation of CD4-positive, alpha-beta T cell differ | 0.00087 |
| GO:0033048 | negative regulation of mitotic sister chromatid segregation   | 0.00089 |
| GO:0030666 | endocytic vesicle membrane                                    | 0.00089 |
| GO:0007094 | mitotic spindle assembly checkpoint                           | 0.00092 |
| GO:0071173 | spindle assembly checkpoint                                   | 0.00092 |
| GO:0071174 | mitotic spindle checkpoint                                    | 0.00092 |
| GO:0006801 | superoxide metabolic process                                  | 0.00094 |
| GO:0051347 | positive regulation of transferase activity                   | 0.00097 |
| GO:0031341 | regulation of cell killing                                    | 0.00097 |
| GO:0046638 | positive regulation of alpha-beta T cell differentiation      | 0.00097 |
| GO:0050731 | positive regulation of peptidyl-tyrosine phosphorylation      | 0.00099 |
| GO:0034612 | response to tumor necrosis factor                             | 0.00099 |
| GO:1904724 | tertiary granule lumen                                        | 0.00101 |
| GO:1902100 | negative regulation of metaphase/anaphase transition of cel   | 0.00106 |
| GO:0045682 | regulation of epidermis development                           | 0.00108 |
| GO:0048661 | positive regulation of smooth muscle cell proliferation       | 0.00108 |
| GO:0043030 | regulation of macrophage activation                           | 0.0011  |
| GO:0048245 | eosinophil chemotaxis                                         | 0.0011  |
| GO:0007091 | metaphase/anaphase transition of mitotic cell cycle           | 0.00113 |
| GO:0002312 | B cell activation involved in immune response                 | 0.00114 |
| GO:0032268 | regulation of cellular protein metabolic process              | 0.00114 |
| GO:0009628 | response to abiotic stimulus                                  | 0.00117 |
| GO:0031577 | spindle checkpoint                                            | 0.00128 |
| GO:0042379 | chemokine receptor binding                                    | 0.0013  |
| GO:0001618 | virus receptor activity                                       | 0.0013  |
| GO:0104005 | hijacked molecular function                                   | 0.0013  |
| GO:0030260 | entry into host cell                                          | 0.00138 |
| GO:0044409 | entry into host                                               | 0.00138 |
| GO:0051806 | entry into cell of other organism involved in symbiotic inte  | 0.00138 |
| GO:0050729 | positive regulation of inflammatory response                  | 0.00139 |
| GO:0052548 | regulation of endopeptidase activity                          | 0.00139 |
| GO:0046634 | regulation of alpha-beta T cell activation                    | 0.0014  |
| GO:0002250 | adaptive immune response                                      | 0.00143 |
| GO:1902099 | regulation of metaphase/anaphase transition of cell cycle     | 0.00146 |
| GO:0150076 | neuroinflammatory response                                    | 0.00148 |
| GO:0046718 | viral entry into host cell                                    | 0.00149 |
| GO:0006979 | response to oxidative stress                                  | 0.00152 |
| GO:0010742 | macrophage derived foam cell differentiation                  | 0.00152 |
| GO:0090077 | foam cell differentiation                                     | 0.00152 |
| GO:0036021 | endolysosome lumen                                            | 0.00153 |
| GO:0051828 | entry into other organism involved in symbiotic interaction   | 0.00157 |
| GO:0033046 | negative regulation of sister chromatid segregation           | 0.00158 |
| GO:0019220 | regulation of phosphate metabolic process                     | 0.00158 |
| GO:0051174 | regulation of phosphorus metabolic process                    | 0.00158 |
| GO:0032611 | interleukin-1 beta production                                 | 0.00158 |
| GO:0032651 | regulation of interleukin-1 beta production                   | 0.00158 |
| GO:0044877 | protein-containing complex binding                            | 0.00173 |
| GO:0001228 | DNA-binding transcription activator activity, RNA polymer     | 0.00173 |
| GO:0005126 | cytokine receptor binding                                     | 0.00173 |
| GO:0031100 | animal organ regeneration                                     | 0.00177 |
| GO:0034447 | very-low-density lipoprotein particle clearance               | 0.00179 |
| GO:0032720 | negative regulation of tumor necrosis factor production       | 0.0018  |
| GO:0034113 | heterotypic cell-cell adhesion                                | 0.0018  |
| GO:0002294 | CD4-positive, alpha-beta T cell differentiation involved in i | 0.00182 |
| GO:0071356 | cellular response to tumor necrosis factor                    | 0.00184 |
| GO:0051783 | regulation of nuclear division                                | 0.00185 |
| GO:0046514 | ceramide catabolic process                                    | 0.00185 |
| GO:0045807 | positive regulation of endocytosis                            | 0.00192 |

|            |                                                             |         |
|------------|-------------------------------------------------------------|---------|
| GO:0045766 | positive regulation of angiogenesis                         | 0.00208 |
| GO:0051321 | meiotic cell cycle                                          | 0.0021  |
| GO:0046466 | membrane lipid catabolic process                            | 0.00211 |
| GO:2000403 | positive regulation of lymphocyte migration                 | 0.00211 |
| GO:0002709 | regulation of T cell mediated immunity                      | 0.00214 |
| GO:0050664 | oxidoreductase activity, acting on NAD(P)H, oxygen as acc   | 0.00217 |
| GO:0005125 | cytokine activity                                           | 0.00221 |
| GO:0034121 | regulation of toll-like receptor signaling pathway          | 0.00225 |
| GO:0002287 | alpha-beta T cell activation involved in immune response    | 0.00227 |
| GO:0002293 | alpha-beta T cell differentiation involved in immune respon | 0.00227 |
| GO:0044784 | metaphase/anaphase transition of cell cycle                 | 0.00228 |
| GO:0016192 | vesicle-mediated transport                                  | 0.00232 |
| GO:0030659 | cytoplasmic vesicle membrane                                | 0.00248 |
| GO:0043549 | regulation of kinase activity                               | 0.00258 |
| GO:0072593 | reactive oxygen species metabolic process                   | 0.00263 |
| GO:0030656 | regulation of vitamin metabolic process                     | 0.00267 |
| GO:0002708 | positive regulation of lymphocyte mediated immunity         | 0.0027  |
| GO:0032612 | interleukin-1 production                                    | 0.0027  |
| GO:0032652 | regulation of interleukin-1 production                      | 0.0027  |
| GO:0010942 | positive regulation of cell death                           | 0.0027  |
| GO:0032722 | positive regulation of chemokine production                 | 0.0028  |
| GO:1903556 | negative regulation of tumor necrosis factor superfamily cy | 0.00286 |
| GO:0043373 | CD4-positive, alpha-beta T cell lineage commitment          | 0.003   |
| GO:0010743 | regulation of macrophage derived foam cell differentiation  | 0.003   |
| GO:0034614 | cellular response to reactive oxygen species                | 0.003   |
| GO:1903046 | meiotic cell cycle process                                  | 0.00312 |
| GO:0002292 | T cell differentiation involved in immune response          | 0.00339 |
| GO:0033047 | regulation of mitotic sister chromatid segregation          | 0.00339 |
| GO:0010035 | response to inorganic substance                             | 0.00341 |
| GO:0008630 | intrinsic apoptotic signaling pathway in response to DNA d  | 0.00341 |
| GO:0042130 | negative regulation of T cell proliferation                 | 0.00347 |
| GO:1905818 | regulation of chromosome separation                         | 0.00347 |
| GO:0071347 | cellular response to interleukin-1                          | 0.00349 |
| GO:0051128 | regulation of cellular component organization               | 0.00351 |
| GO:0002313 | mature B cell differentiation involved in immune response   | 0.00352 |
| GO:2000401 | regulation of lymphocyte migration                          | 0.00358 |
| GO:0033045 | regulation of sister chromatid segregation                  | 0.00358 |
| GO:0071900 | regulation of protein serine/threonine kinase activity      | 0.00363 |
| GO:0045860 | positive regulation of protein kinase activity              | 0.00363 |
| GO:0071214 | cellular response to abiotic stimulus                       | 0.0037  |
| GO:0104004 | cellular response to environmental stimulus                 | 0.0037  |
| GO:0002705 | positive regulation of leukocyte mediated immunity          | 0.0037  |
| GO:1905952 | regulation of lipid localization                            | 0.00381 |
| GO:1902531 | regulation of intracellular signal transduction             | 0.00398 |
| GO:1904018 | positive regulation of vasculature development              | 0.00411 |
| GO:0032715 | negative regulation of interleukin-6 production             | 0.00412 |
| GO:2000404 | regulation of T cell migration                              | 0.00412 |
| GO:0030149 | sphingolipid catabolic process                              | 0.00416 |
| GO:0036336 | dendritic cell migration                                    | 0.00416 |
| GO:0097190 | apoptotic signaling pathway                                 | 0.00417 |
| GO:0046637 | regulation of alpha-beta T cell differentiation             | 0.00432 |
| GO:0033344 | cholesterol efflux                                          | 0.00442 |
| GO:0045058 | T cell selection                                            | 0.00442 |
| GO:0071675 | regulation of mononuclear cell migration                    | 0.00442 |
| GO:0045839 | negative regulation of mitotic nuclear division             | 0.00447 |
| GO:0022414 | reproductive process                                        | 0.00483 |
| GO:0048568 | embryonic organ development                                 | 0.00486 |
| GO:1903557 | positive regulation of tumor necrosis factor superfamily cy | 0.00492 |
| GO:0016310 | phosphorylation                                             | 0.00513 |
| GO:0032760 | positive regulation of tumor necrosis factor production     | 0.00525 |
| GO:0045123 | cellular extravasation                                      | 0.00526 |
| GO:0050673 | epithelial cell proliferation                               | 0.00529 |
| GO:0002460 | adaptive immune response based on somatic recombination     | 0.00529 |
| GO:0010631 | epithelial cell migration                                   | 0.00531 |
| GO:0000003 | reproduction                                                | 0.00535 |
| GO:0002269 | leukocyte activation involved in inflammatory response      | 0.00548 |
| GO:0030225 | macrophage differentiation                                  | 0.00548 |
| GO:0010466 | negative regulation of peptidase activity                   | 0.00572 |
| GO:0002407 | dendritic cell chemotaxis                                   | 0.00581 |
| GO:0044092 | negative regulation of molecular function                   | 0.00581 |
| GO:0046209 | nitric oxide metabolic process                              | 0.00582 |
| GO:0030856 | regulation of epithelial cell differentiation               | 0.00623 |

|            |                                                               |         |
|------------|---------------------------------------------------------------|---------|
| GO:0043086 | negative regulation of catalytic activity                     | 0.00625 |
| GO:0060429 | epithelium development                                        | 0.00645 |
| GO:0050678 | regulation of epithelial cell proliferation                   | 0.00645 |
| GO:0001890 | placenta development                                          | 0.00651 |
| GO:0030888 | regulation of B cell proliferation                            | 0.00659 |
| GO:0042093 | T-helper cell differentiation                                 | 0.00659 |
| GO:1905521 | regulation of macrophage migration                            | 0.0066  |
| GO:0090132 | epithelium migration                                          | 0.00681 |
| GO:0001774 | microglial cell activation                                    | 0.00681 |
| GO:0035987 | endodermal cell differentiation                               | 0.00681 |
| GO:2000406 | positive regulation of T cell migration                       | 0.00681 |
| GO:0032755 | positive regulation of interleukin-6 production               | 0.00692 |
| GO:2001057 | reactive nitrogen species metabolic process                   | 0.00694 |
| GO:0140013 | meiotic nuclear division                                      | 0.00729 |
| GO:1901216 | positive regulation of neuron death                           | 0.00767 |
| GO:0000942 | condensed nuclear chromosome outer kinetochore                | 0.00772 |
| GO:0048660 | regulation of smooth muscle cell proliferation                | 0.00804 |
| GO:0001704 | formation of primary germ layer                               | 0.00822 |
| GO:0030100 | regulation of endocytosis                                     | 0.00824 |
| GO:0042554 | superoxide anion generation                                   | 0.00825 |
| GO:0002440 | production of molecular mediator of immune response           | 0.00831 |
| GO:1905954 | positive regulation of lipid localization                     | 0.00832 |
| GO:0033674 | positive regulation of kinase activity                        | 0.00867 |
| GO:0097028 | dendritic cell differentiation                                | 0.00876 |
| GO:0014070 | response to organic cyclic compound                           | 0.00876 |
| GO:0071496 | cellular response to external stimulus                        | 0.00877 |
| GO:0043370 | regulation of CD4-positive, alpha-beta T cell differentiation | 0.00878 |
| GO:0002468 | dendritic cell antigen processing and presentation            | 0.00885 |
| GO:0072540 | T-helper 17 cell lineage commitment                           | 0.00885 |
| GO:0035690 | cellular response to drug                                     | 0.00885 |
| GO:0032637 | interleukin-8 production                                      | 0.0093  |
| GO:0032677 | regulation of interleukin-8 production                        | 0.0093  |
| GO:0048598 | embryonic morphogenesis                                       | 0.00954 |
| GO:0043369 | CD4-positive or CD8-positive, alpha-beta T cell lineage com   | 0.00991 |
| GO:0002702 | positive regulation of production of molecular mediator of i  | 0.01024 |
| GO:0002700 | regulation of production of molecular mediator of immune      | 0.01027 |
| GO:0010915 | regulation of very-low-density lipoprotein particle clearanc  | 0.0103  |
| GO:0010916 | negative regulation of very-low-density lipoprotein particle  | 0.0103  |
| GO:0038156 | interleukin-3-mediated signaling pathway                      | 0.0103  |
| GO:0031399 | regulation of protein modification process                    | 0.0104  |
| GO:0036019 | endolysosome                                                  | 0.01048 |
| GO:0048020 | CCR chemokine receptor binding                                | 0.01061 |
| GO:0032733 | positive regulation of interleukin-10 production              | 0.01072 |
| GO:0042221 | response to chemical                                          | 0.01072 |
| GO:0090183 | regulation of kidney development                              | 0.01076 |
| GO:0010951 | negative regulation of endopeptidase activity                 | 0.01078 |
| GO:0030574 | collagen catabolic process                                    | 0.011   |
| GO:1905953 | negative regulation of lipid localization                     | 0.011   |
| GO:0006809 | nitric oxide biosynthetic process                             | 0.01102 |
| GO:0032729 | positive regulation of interferon-gamma production            | 0.01102 |
| GO:0090130 | tissue migration                                              | 0.01105 |
| GO:2000377 | regulation of reactive oxygen species metabolic process       | 0.01123 |
| GO:0048659 | smooth muscle cell proliferation                              | 0.01143 |
| GO:0070555 | response to interleukin-1                                     | 0.01148 |
| GO:0043020 | NADPH oxidase complex                                         | 0.01167 |
| GO:0030301 | cholesterol transport                                         | 0.01196 |
| GO:0003338 | metanephros morphogenesis                                     | 0.01266 |
| GO:0009967 | positive regulation of signal transduction                    | 0.01268 |
| GO:0002698 | negative regulation of immune effector process                | 0.01272 |
| GO:0031294 | lymphocyte costimulation                                      | 0.01278 |
| GO:0009790 | embryo development                                            | 0.01295 |
| GO:0098636 | protein complex involved in cell adhesion                     | 0.0132  |
| GO:0002295 | T-helper cell lineage commitment                              | 0.01327 |
| GO:0045591 | positive regulation of regulatory T cell differentiation      | 0.01327 |
| GO:0034383 | low-density lipoprotein particle clearance                    | 0.0134  |
| GO:0002711 | positive regulation of T cell mediated immunity               | 0.01363 |
| GO:0048144 | fibroblast proliferation                                      | 0.01371 |
| GO:0007135 | meiosis II                                                    | 0.01371 |
| GO:0045144 | meiotic sister chromatid segregation                          | 0.01371 |
| GO:0051177 | meiotic sister chromatid cohesion                             | 0.01371 |
| GO:0061983 | meiosis II cell cycle process                                 | 0.01371 |
| GO:0043068 | positive regulation of programmed cell death                  | 0.01374 |

|            |                                                               |         |
|------------|---------------------------------------------------------------|---------|
| GO:0045165 | cell fate commitment                                          | 0.01375 |
| GO:0070301 | cellular response to hydrogen peroxide                        | 0.01379 |
| GO:0033077 | T cell differentiation in thymus                              | 0.01461 |
| GO:0051784 | negative regulation of nuclear division                       | 0.01464 |
| GO:0051336 | regulation of hydrolase activity                              | 0.01566 |
| GO:0006793 | phosphorus metabolic process                                  | 0.01599 |
| GO:0038024 | cargo receptor activity                                       | 0.0165  |
| GO:0048146 | positive regulation of fibroblast proliferation               | 0.01714 |
| GO:0043627 | response to estrogen                                          | 0.01722 |
| GO:0042088 | T-helper 1 type immune response                               | 0.0174  |
| GO:0045684 | positive regulation of epidermis development                  | 0.01744 |
| GO:2000514 | regulation of CD4-positive, alpha-beta T cell activation      | 0.01751 |
| GO:0051234 | establishment of localization                                 | 0.01751 |
| GO:0048771 | tissue remodeling                                             | 0.01754 |
| GO:0043065 | positive regulation of apoptotic process                      | 0.01758 |
| GO:0071407 | cellular response to organic cyclic compound                  | 0.01775 |
| GO:0001910 | regulation of leukocyte mediated cytotoxicity                 | 0.01837 |
| GO:0098805 | whole membrane                                                | 0.01924 |
| GO:0045428 | regulation of nitric oxide biosynthetic process               | 0.01955 |
| GO:0000302 | response to reactive oxygen species                           | 0.02017 |
| GO:0001706 | endoderm formation                                            | 0.02039 |
| GO:0002820 | negative regulation of adaptive immune response               | 0.02039 |
| GO:0048732 | gland development                                             | 0.02129 |
| GO:0030857 | negative regulation of epithelial cell differentiation        | 0.02182 |
| GO:0030851 | granulocyte differentiation                                   | 0.02212 |
| GO:0032689 | negative regulation of interferon-gamma production            | 0.02212 |
| GO:0045616 | regulation of keratinocyte differentiation                    | 0.02212 |
| GO:0043368 | positive T cell selection                                     | 0.02212 |
| GO:0043615 | astrocyte cell migration                                      | 0.02212 |
| GO:0050878 | regulation of body fluid levels                               | 0.02231 |
| GO:0048145 | regulation of fibroblast proliferation                        | 0.02323 |
| GO:0002704 | negative regulation of leukocyte mediated immunity            | 0.02449 |
| GO:0010575 | positive regulation of vascular endothelial growth factor pr  | 0.02559 |
| GO:1900745 | positive regulation of p38MAPK cascade                        | 0.02559 |
| GO:0035580 | specific granule lumen                                        | 0.02608 |
| GO:0042060 | wound healing                                                 | 0.02621 |
| GO:0032964 | collagen biosynthetic process                                 | 0.02662 |
| GO:0051246 | regulation of protein metabolic process                       | 0.02663 |
| GO:0071236 | cellular response to antibiotic                               | 0.02678 |
| GO:0045862 | positive regulation of proteolysis                            | 0.02687 |
| GO:0033627 | cell adhesion mediated by integrin                            | 0.02697 |
| GO:2000379 | positive regulation of reactive oxygen species metabolic pr   | 0.02697 |
| GO:0071295 | cellular response to vitamin                                  | 0.02697 |
| GO:0010573 | vascular endothelial growth factor production                 | 0.02765 |
| GO:0046633 | alpha-beta T cell proliferation                               | 0.02765 |
| GO:0008305 | integrin complex                                              | 0.02818 |
| GO:0031960 | response to corticosteroid                                    | 0.0282  |
| GO:0006796 | phosphate-containing compound metabolic process               | 0.02842 |
| GO:0051216 | cartilage development                                         | 0.02854 |
| GO:1901214 | regulation of neuron death                                    | 0.02862 |
| GO:0031343 | positive regulation of cell killing                           | 0.02865 |
| GO:1902106 | negative regulation of leukocyte differentiation              | 0.02915 |
| GO:0010632 | regulation of epithelial cell migration                       | 0.03028 |
| GO:0018212 | peptidyl-tyrosine modification                                | 0.03028 |
| GO:0097435 | supramolecular fiber organization                             | 0.03074 |
| GO:0061900 | glial cell activation                                         | 0.03074 |
| GO:1902930 | regulation of alcohol biosynthetic process                    | 0.03074 |
| GO:0000165 | MAPK cascade                                                  | 0.03339 |
| GO:0023014 | signal transduction by protein phosphorylation                | 0.03339 |
| GO:0001101 | response to acid chemical                                     | 0.03339 |
| GO:2000108 | positive regulation of leukocyte apoptotic process            | 0.03382 |
| GO:0034142 | toll-like receptor 4 signaling pathway                        | 0.03427 |
| GO:0046640 | regulation of alpha-beta T cell proliferation                 | 0.03472 |
| GO:0043280 | positive regulation of cysteine-type endopeptidase activity i | 0.03531 |
| GO:0001822 | kidney development                                            | 0.03538 |
| GO:0030278 | regulation of ossification                                    | 0.03695 |
| GO:0043405 | regulation of MAP kinase activity                             | 0.03804 |
| GO:0007492 | endoderm development                                          | 0.03865 |
| GO:0010888 | negative regulation of lipid storage                          | 0.03865 |
| GO:0046641 | positive regulation of alpha-beta T cell proliferation        | 0.03865 |
| GO:0071887 | leukocyte apoptotic process                                   | 0.03865 |
| GO:0002823 | negative regulation of adaptive immune response based on s    | 0.0388  |

|                               |                                                             |          |
|-------------------------------|-------------------------------------------------------------|----------|
| GO:0002367                    | cytokine production involved in immune response             | 0.0392   |
| GO:0002718                    | regulation of cytokine production involved in immune respo  | 0.0392   |
| GO:0046849                    | bone remodeling                                             | 0.0392   |
| GO:0031295                    | T cell costimulation                                        | 0.04122  |
| GO:0016175                    | superoxide-generating NADPH oxidase activity                | 0.04145  |
| GO:0045824                    | negative regulation of innate immune response               | 0.042    |
| GO:0006569                    | tryptophan catabolic process                                | 0.04227  |
| GO:0042436                    | indole-containing compound catabolic process                | 0.04227  |
| GO:0043301                    | negative regulation of leukocyte degranulation              | 0.04227  |
| GO:0045060                    | negative thymic T cell selection                            | 0.04227  |
| GO:0046218                    | indolalkylamine catabolic process                           | 0.04227  |
| GO:0071492                    | cellular response to UV-A                                   | 0.04227  |
| GO:1902510                    | regulation of apoptotic DNA fragmentation                   | 0.04227  |
| GO:0002883                    | regulation of hypersensitivity                              | 0.04251  |
| GO:0002369                    | T cell cytokine production                                  | 0.04251  |
| GO:0002724                    | regulation of T cell cytokine production                    | 0.04251  |
| GO:0002825                    | regulation of T-helper 1 type immune response               | 0.04258  |
| GO:0046890                    | regulation of lipid biosynthetic process                    | 0.04272  |
| GO:0038187                    | pattern recognition receptor activity                       | 0.04356  |
| GO:0051345                    | positive regulation of hydrolase activity                   | 0.04427  |
| GO:0010744                    | positive regulation of macrophage derived foam cell differe | 0.04515  |
| GO:0030050                    | vesicle transport along actin filament                      | 0.04515  |
| GO:0043031                    | negative regulation of macrophage activation                | 0.04515  |
| GO:0045618                    | positive regulation of keratinocyte differentiation         | 0.04515  |
| GO:0032731                    | positive regulation of interleukin-1 beta production        | 0.04672  |
| GO:0030203                    | glycosaminoglycan metabolic process                         | 0.04682  |
| GO:0002228                    | natural killer cell mediated immunity                       | 0.04693  |
| GO:0002707                    | negative regulation of lymphocyte mediated immunity         | 0.04706  |
| GO:0043300                    | regulation of leukocyte degranulation                       | 0.04706  |
| GO:0042113                    | B cell activation                                           | 0.04745  |
| GO:0043542                    | endothelial cell migration                                  | 0.04819  |
| GO:1903426                    | regulation of reactive oxygen species biosynthetic process  | 0.04831  |
| GO:1903409                    | reactive oxygen species biosynthetic process                | 0.04849  |
| GO:2000106                    | regulation of leukocyte apoptotic process                   | 0.04851  |
| GO:0001913                    | T cell mediated cytotoxicity                                | 0.04924  |
| GO:0033002                    | muscle cell proliferation                                   | 0.0493   |
| GO:0070228                    | regulation of lymphocyte apoptotic process                  | 0.04965  |
| GO:0031670                    | cellular response to nutrient                               | 0.04965  |
| GO:0002827                    | positive regulation of T-helper 1 type immune response      | 0.04965  |
| <b>Medium_No Trend Common</b> |                                                             |          |
| GO:0002376                    | immune system process                                       | 3.00E-32 |
| GO:0001775                    | cell activation                                             | 1.66E-31 |
| GO:0006954                    | inflammatory response                                       | 4.18E-28 |
| GO:0045321                    | leukocyte activation                                        | 1.39E-27 |
| GO:0008283                    | cell proliferation                                          | 5.32E-26 |
| GO:0042127                    | regulation of cell proliferation                            | 8.87E-26 |
| GO:0006955                    | immune response                                             | 3.26E-25 |
| GO:0002274                    | myeloid leukocyte activation                                | 2.00E-24 |
| GO:0070887                    | cellular response to chemical stimulus                      | 3.35E-24 |
| GO:0010033                    | response to organic substance                               | 1.36E-22 |
| GO:0002366                    | leukocyte activation involved in immune response            | 5.32E-22 |
| GO:0002263                    | cell activation involved in immune response                 | 1.15E-21 |
| GO:0034097                    | response to cytokine                                        | 3.43E-21 |
| GO:0030155                    | regulation of cell adhesion                                 | 1.23E-20 |
| GO:0071310                    | cellular response to organic substance                      | 1.88E-20 |
| GO:0043299                    | leukocyte degranulation                                     | 2.16E-20 |
| GO:0071345                    | cellular response to cytokine stimulus                      | 6.12E-20 |
| GO:0002444                    | myeloid leukocyte mediated immunity                         | 7.24E-20 |
| GO:0051716                    | cellular response to stimulus                               | 1.51E-19 |
| GO:0002275                    | myeloid cell activation involved in immune response         | 2.87E-19 |
| GO:0050900                    | leukocyte migration                                         | 3.58E-19 |
| GO:0002682                    | regulation of immune system process                         | 8.83E-19 |
| GO:0044421                    | extracellular region part                                   | 6.43E-18 |
| GO:0008284                    | positive regulation of cell proliferation                   | 8.45E-18 |
| GO:0036230                    | granulocyte activation                                      | 1.17E-17 |
| GO:0002446                    | neutrophil mediated immunity                                | 1.17E-17 |
| GO:0042119                    | neutrophil activation                                       | 1.17E-17 |
| GO:0019221                    | cytokine-mediated signaling pathway                         | 1.62E-17 |
| GO:0006952                    | defense response                                            | 2.93E-17 |
| GO:0043312                    | neutrophil degranulation                                    | 3.26E-17 |
| GO:0048584                    | positive regulation of response to stimulus                 | 3.26E-17 |
| GO:0006950                    | response to stress                                          | 6.98E-17 |

|            |                                                           |          |
|------------|-----------------------------------------------------------|----------|
| GO:0002521 | leukocyte differentiation                                 | 8.77E-17 |
| GO:2000147 | positive regulation of cell motility                      | 1.06E-16 |
| GO:0002283 | neutrophil activation involved in immune response         | 1.07E-16 |
| GO:0030335 | positive regulation of cell migration                     | 1.41E-16 |
| GO:0030595 | leukocyte chemotaxis                                      | 3.96E-16 |
| GO:0001817 | regulation of cytokine production                         | 4.31E-16 |
| GO:0051272 | positive regulation of cellular component movement        | 4.98E-16 |
| GO:0001816 | cytokine production                                       | 5.25E-16 |
| GO:0002443 | leukocyte mediated immunity                               | 5.80E-16 |
| GO:0060326 | cell chemotaxis                                           | 9.75E-16 |
| GO:0001934 | positive regulation of protein phosphorylation            | 9.75E-16 |
| GO:1901700 | response to oxygen-containing compound                    | 2.65E-15 |
| GO:0042221 | response to chemical                                      | 3.36E-15 |
| GO:0040017 | positive regulation of locomotion                         | 3.40E-15 |
| GO:0005615 | extracellular space                                       | 3.96E-15 |
| GO:0097529 | myeloid leukocyte migration                               | 4.54E-15 |
| GO:0050865 | regulation of cell activation                             | 6.46E-15 |
| GO:0045785 | positive regulation of cell adhesion                      | 1.48E-14 |
| GO:0045055 | regulated exocytosis                                      | 1.73E-14 |
| GO:0010562 | positive regulation of phosphorus metabolic process       | 2.10E-14 |
| GO:0045937 | positive regulation of phosphate metabolic process        | 2.10E-14 |
| GO:0002252 | immune effector process                                   | 2.97E-14 |
| GO:0032963 | collagen metabolic process                                | 4.27E-14 |
| GO:0042110 | T cell activation                                         | 4.91E-14 |
| GO:0009967 | positive regulation of signal transduction                | 1.11E-13 |
| GO:0032940 | secretion by cell                                         | 1.78E-13 |
| GO:0046903 | secretion                                                 | 2.04E-13 |
| GO:0042327 | positive regulation of phosphorylation                    | 2.32E-13 |
| GO:0048534 | hematopoietic or lymphoid organ development               | 3.00E-13 |
| GO:0007159 | leukocyte cell-cell adhesion                              | 3.13E-13 |
| GO:0043410 | positive regulation of MAPK cascade                       | 3.81E-13 |
| GO:1902533 | positive regulation of intracellular signal transduction  | 4.04E-13 |
| GO:0042060 | wound healing                                             | 4.13E-13 |
| GO:0022407 | regulation of cell-cell adhesion                          | 4.29E-13 |
| GO:0042581 | specific granule                                          | 4.51E-13 |
| GO:0022409 | positive regulation of cell-cell adhesion                 | 4.97E-13 |
| GO:0002520 | immune system development                                 | 5.36E-13 |
| GO:0043085 | positive regulation of catalytic activity                 | 1.02E-12 |
| GO:0030097 | hemopoiesis                                               | 1.20E-12 |
| GO:1903037 | regulation of leukocyte cell-cell adhesion                | 1.37E-12 |
| GO:0031401 | positive regulation of protein modification process       | 1.54E-12 |
| GO:0002694 | regulation of leukocyte activation                        | 1.64E-12 |
| GO:0046649 | lymphocyte activation                                     | 1.79E-12 |
| GO:0030141 | secretory granule                                         | 2.08E-12 |
| GO:0050866 | negative regulation of cell activation                    | 2.13E-12 |
| GO:0001819 | positive regulation of cytokine production                | 2.97E-12 |
| GO:0032270 | positive regulation of cellular protein metabolic process | 3.78E-12 |
| GO:0006887 | exocytosis                                                | 4.18E-12 |
| GO:0043542 | endothelial cell migration                                | 4.44E-12 |
| GO:0010631 | epithelial cell migration                                 | 6.80E-12 |
| GO:0002237 | response to molecule of bacterial origin                  | 7.41E-12 |
| GO:1901701 | cellular response to oxygen-containing compound           | 7.58E-12 |
| GO:0048518 | positive regulation of biological process                 | 7.85E-12 |
| GO:0048522 | positive regulation of cellular process                   | 1.30E-11 |
| GO:0090132 | epithelium migration                                      | 1.47E-11 |
| GO:0001932 | regulation of protein phosphorylation                     | 1.55E-11 |
| GO:0072676 | lymphocyte migration                                      | 1.89E-11 |
| GO:0005125 | cytokine activity                                         | 1.91E-11 |
| GO:0050790 | regulation of catalytic activity                          | 2.10E-11 |
| GO:0070374 | positive regulation of ERK1 and ERK2 cascade              | 2.49E-11 |
| GO:0051247 | positive regulation of protein metabolic process          | 2.50E-11 |
| GO:0090130 | tissue migration                                          | 2.71E-11 |
| GO:1903039 | positive regulation of leukocyte cell-cell adhesion       | 3.04E-11 |
| GO:0070820 | tertiary granule                                          | 3.50E-11 |
| GO:0051345 | positive regulation of hydrolase activity                 | 7.20E-11 |
| GO:0032496 | response to lipopolysaccharide                            | 8.80E-11 |
| GO:0031982 | vesicle                                                   | 1.02E-10 |
| GO:0030098 | lymphocyte differentiation                                | 1.03E-10 |
| GO:0050863 | regulation of T cell activation                           | 1.06E-10 |
| GO:0042098 | T cell proliferation                                      | 1.06E-10 |
| GO:0070663 | regulation of leukocyte proliferation                     | 1.13E-10 |
| GO:0032944 | regulation of mononuclear cell proliferation              | 1.13E-10 |

|            |                                                                       |          |
|------------|-----------------------------------------------------------------------|----------|
| GO:0070661 | leukocyte proliferation                                               | 1.29E-10 |
| GO:1904018 | positive regulation of vasculature development                        | 1.39E-10 |
| GO:0031347 | regulation of defense response                                        | 1.55E-10 |
| GO:0050670 | regulation of lymphocyte proliferation                                | 1.67E-10 |
| GO:0002685 | regulation of leukocyte migration                                     | 2.38E-10 |
| GO:0042129 | regulation of T cell proliferation                                    | 3.55E-10 |
| GO:0045766 | positive regulation of angiogenesis                                   | 3.55E-10 |
| GO:0071219 | cellular response to molecule of bacterial origin                     | 3.96E-10 |
| GO:0033993 | response to lipid                                                     | 4.07E-10 |
| GO:0043408 | regulation of MAPK cascade                                            | 4.41E-10 |
| GO:1902531 | regulation of intracellular signal transduction                       | 4.75E-10 |
| GO:0071222 | cellular response to lipopolysaccharide                               | 5.30E-10 |
| GO:0050776 | regulation of immune response                                         | 5.60E-10 |
| GO:0071216 | cellular response to biotic stimulus                                  | 5.71E-10 |
| GO:0050673 | epithelial cell proliferation                                         | 7.08E-10 |
| GO:0002695 | negative regulation of leukocyte activation                           | 7.68E-10 |
| GO:0050878 | regulation of body fluid levels                                       | 7.83E-10 |
| GO:0008285 | negative regulation of cell proliferation                             | 8.72E-10 |
| GO:0070098 | chemokine-mediated signaling pathway                                  | 1.15E-09 |
| GO:0002684 | positive regulation of immune system process                          | 1.20E-09 |
| GO:0032943 | mononuclear cell proliferation                                        | 1.21E-09 |
| GO:0097530 | granulocyte migration                                                 | 1.33E-09 |
| GO:0042592 | homeostatic process                                                   | 1.58E-09 |
| GO:0002703 | regulation of leukocyte mediated immunity                             | 1.63E-09 |
| GO:0071621 | granulocyte chemotaxis                                                | 2.00E-09 |
| GO:1990868 | response to chemokine                                                 | 2.12E-09 |
| GO:1990869 | cellular response to chemokine                                        | 2.12E-09 |
| GO:0042325 | regulation of phosphorylation                                         | 3.02E-09 |
| GO:0046651 | lymphocyte proliferation                                              | 3.11E-09 |
| GO:0071674 | mononuclear cell migration                                            | 3.27E-09 |
| GO:0030593 | neutrophil chemotaxis                                                 | 3.38E-09 |
| GO:0002548 | monocyte chemotaxis                                                   | 3.80E-09 |
| GO:0050870 | positive regulation of T cell activation                              | 3.86E-09 |
| GO:0031410 | cytoplasmic vesicle                                                   | 3.99E-09 |
| GO:0097708 | intracellular vesicle                                                 | 3.99E-09 |
| GO:0002819 | regulation of adaptive immune response                                | 4.16E-09 |
| GO:0008009 | chemokine activity                                                    | 5.02E-09 |
| GO:0030217 | T cell differentiation                                                | 5.03E-09 |
| GO:0035579 | specific granule membrane                                             | 5.17E-09 |
| GO:0002683 | negative regulation of immune system process                          | 5.22E-09 |
| GO:0030667 | secretory granule membrane                                            | 5.44E-09 |
| GO:0030574 | collagen catabolic process                                            | 6.44E-09 |
| GO:1990266 | neutrophil migration                                                  | 6.71E-09 |
| GO:0070821 | tertiary granule membrane                                             | 1.36E-08 |
| GO:0099503 | secretory vesicle                                                     | 1.49E-08 |
| GO:0070372 | regulation of ERK1 and ERK2 cascade                                   | 1.53E-08 |
| GO:0019220 | regulation of phosphate metabolic process                             | 1.86E-08 |
| GO:0051174 | regulation of phosphorus metabolic process                            | 1.86E-08 |
| GO:0048771 | tissue remodeling                                                     | 2.08E-08 |
| GO:0051336 | regulation of hydrolase activity                                      | 2.90E-08 |
| GO:0050678 | regulation of epithelial cell proliferation                           | 2.92E-08 |
| GO:1902105 | regulation of leukocyte differentiation                               | 3.10E-08 |
| GO:0050920 | regulation of chemotaxis                                              | 5.08E-08 |
| GO:0070371 | ERK1 and ERK2 cascade                                                 | 5.83E-08 |
| GO:0050867 | positive regulation of cell activation                                | 8.73E-08 |
| GO:0033627 | cell adhesion mediated by integrin                                    | 9.62E-08 |
| GO:0080134 | regulation of response to stress                                      | 1.14E-07 |
| GO:0046631 | alpha-beta T cell activation                                          | 1.46E-07 |
| GO:0032103 | positive regulation of response to external stimulus                  | 1.82E-07 |
| GO:0034341 | response to interferon-gamma                                          | 1.82E-07 |
| GO:0045621 | positive regulation of lymphocyte differentiation                     | 1.98E-07 |
| GO:0044433 | cytoplasmic vesicle part                                              | 2.12E-07 |
| GO:0002573 | myeloid leukocyte differentiation                                     | 2.53E-07 |
| GO:0010941 | regulation of cell death                                              | 2.73E-07 |
| GO:0051249 | regulation of lymphocyte activation                                   | 2.95E-07 |
| GO:0043068 | positive regulation of programmed cell death                          | 3.43E-07 |
| GO:0035987 | endodermal cell differentiation                                       | 3.46E-07 |
| GO:0000323 | lytic vacuole                                                         | 3.51E-07 |
| GO:0005764 | lysosome                                                              | 3.51E-07 |
| GO:0002367 | cytokine production involved in immune response                       | 3.58E-07 |
| GO:0002718 | regulation of cytokine production involved in immune response         | 3.58E-07 |
| GO:0002822 | regulation of adaptive immune response based on somatic recombination | 3.76E-07 |

|            |                                                             |          |
|------------|-------------------------------------------------------------|----------|
| GO:0031399 | regulation of protein modification process                  | 3.84E-07 |
| GO:0007162 | negative regulation of cell adhesion                        | 3.97E-07 |
| GO:0002687 | positive regulation of leukocyte migration                  | 4.28E-07 |
| GO:0002696 | positive regulation of leukocyte activation                 | 4.44E-07 |
| GO:0010942 | positive regulation of cell death                           | 4.61E-07 |
| GO:0051250 | negative regulation of lymphocyte activation                | 5.44E-07 |
| GO:1902107 | positive regulation of leukocyte differentiation            | 5.68E-07 |
| GO:0001818 | negative regulation of cytokine production                  | 7.02E-07 |
| GO:0043065 | positive regulation of apoptotic process                    | 7.03E-07 |
| GO:0050764 | regulation of phagocytosis                                  | 7.40E-07 |
| GO:0008219 | cell death                                                  | 7.91E-07 |
| GO:0048523 | negative regulation of cellular process                     | 8.15E-07 |
| GO:0072678 | T cell migration                                            | 8.19E-07 |
| GO:0018212 | peptidyl-tyrosine modification                              | 8.25E-07 |
| GO:0002699 | positive regulation of immune effector process              | 8.78E-07 |
| GO:0048519 | negative regulation of biological process                   | 9.01E-07 |
| GO:0032946 | positive regulation of mononuclear cell proliferation       | 9.11E-07 |
| GO:0001822 | kidney development                                          | 9.12E-07 |
| GO:0071396 | cellular response to lipid                                  | 1.09E-06 |
| GO:0031349 | positive regulation of defense response                     | 1.09E-06 |
| GO:0042102 | positive regulation of T cell proliferation                 | 1.39E-06 |
| GO:0010632 | regulation of epithelial cell migration                     | 1.51E-06 |
| GO:0002688 | regulation of leukocyte chemotaxis                          | 1.63E-06 |
| GO:0070664 | negative regulation of leukocyte proliferation              | 1.65E-06 |
| GO:0045619 | regulation of lymphocyte differentiation                    | 1.75E-06 |
| GO:0050671 | positive regulation of lymphocyte proliferation             | 1.76E-06 |
| GO:0002706 | regulation of lymphocyte mediated immunity                  | 2.22E-06 |
| GO:0071346 | cellular response to interferon-gamma                       | 2.23E-06 |
| GO:0002700 | regulation of production of molecular mediator of immune    | 2.24E-06 |
| GO:0032635 | interleukin-6 production                                    | 2.28E-06 |
| GO:0032675 | regulation of interleukin-6 production                      | 2.28E-06 |
| GO:0001704 | formation of primary germ layer                             | 2.36E-06 |
| GO:0000165 | MAPK cascade                                                | 2.59E-06 |
| GO:0023014 | signal transduction by protein phosphorylation              | 2.59E-06 |
| GO:0045860 | positive regulation of protein kinase activity              | 2.60E-06 |
| GO:0070665 | positive regulation of leukocyte proliferation              | 2.76E-06 |
| GO:0001909 | leukocyte mediated cytotoxicity                             | 2.82E-06 |
| GO:0048247 | lymphocyte chemotaxis                                       | 2.86E-06 |
| GO:0050729 | positive regulation of inflammatory response                | 3.09E-06 |
| GO:0030856 | regulation of epithelial cell differentiation               | 3.16E-06 |
| GO:1903708 | positive regulation of hemopoiesis                          | 3.42E-06 |
| GO:0043067 | regulation of programmed cell death                         | 3.43E-06 |
| GO:0032609 | interferon-gamma production                                 | 3.82E-06 |
| GO:0050672 | negative regulation of lymphocyte proliferation             | 3.83E-06 |
| GO:0032268 | regulation of cellular protein metabolic process            | 5.45E-06 |
| GO:0002456 | T cell mediated immunity                                    | 5.46E-06 |
| GO:0032945 | negative regulation of mononuclear cell proliferation       | 5.54E-06 |
| GO:0031325 | positive regulation of cellular metabolic process           | 5.74E-06 |
| GO:0022408 | negative regulation of cell-cell adhesion                   | 6.04E-06 |
| GO:0097435 | supramolecular fiber organization                           | 6.04E-06 |
| GO:0045859 | regulation of protein kinase activity                       | 6.12E-06 |
| GO:0051173 | positive regulation of nitrogen compound metabolic process  | 6.13E-06 |
| GO:0042981 | regulation of apoptotic process                             | 6.16E-06 |
| GO:1901136 | carbohydrate derivative catabolic process                   | 6.22E-06 |
| GO:0050766 | positive regulation of phagocytosis                         | 6.75E-06 |
| GO:0005773 | vacuole                                                     | 7.25E-06 |
| GO:0032649 | regulation of interferon-gamma production                   | 7.57E-06 |
| GO:0009636 | response to toxic substance                                 | 7.86E-06 |
| GO:0009790 | embryo development                                          | 8.19E-06 |
| GO:0050868 | negative regulation of T cell activation                    | 8.19E-06 |
| GO:0010604 | positive regulation of macromolecule metabolic process      | 8.25E-06 |
| GO:0009893 | positive regulation of metabolic process                    | 8.28E-06 |
| GO:0045582 | positive regulation of T cell differentiation               | 9.34E-06 |
| GO:0001706 | endoderm formation                                          | 9.52E-06 |
| GO:0012501 | programmed cell death                                       | 9.71E-06 |
| GO:0033674 | positive regulation of kinase activity                      | 1.01E-05 |
| GO:1903038 | negative regulation of leukocyte cell-cell adhesion         | 1.01E-05 |
| GO:0031341 | regulation of cell killing                                  | 1.08E-05 |
| GO:0071706 | tumor necrosis factor superfamily cytokine production       | 1.16E-05 |
| GO:1903555 | regulation of tumor necrosis factor superfamily cytokine pr | 1.16E-05 |
| GO:0060429 | epithelium development                                      | 1.37E-05 |
| GO:0042130 | negative regulation of T cell proliferation                 | 1.47E-05 |



|            |                                                              |          |
|------------|--------------------------------------------------------------|----------|
| GO:0042379 | chemokine receptor binding                                   | 1.50E-05 |
| GO:0005126 | cytokine receptor binding                                    | 1.64E-05 |
| GO:0045580 | regulation of T cell differentiation                         | 1.70E-05 |
| GO:0002440 | production of molecular mediator of immune response          | 1.72E-05 |
| GO:0051347 | positive regulation of transferase activity                  | 1.73E-05 |
| GO:0007492 | endoderm development                                         | 1.83E-05 |
| GO:0032640 | tumor necrosis factor production                             | 1.87E-05 |
| GO:0032680 | regulation of tumor necrosis factor production               | 1.87E-05 |
| GO:0016310 | phosphorylation                                              | 1.89E-05 |
| GO:0046634 | regulation of alpha-beta T cell activation                   | 1.96E-05 |
| GO:0070062 | extracellular exosome                                        | 2.02E-05 |
| GO:0032964 | collagen biosynthetic process                                | 2.04E-05 |
| GO:0030855 | epithelial cell differentiation                              | 2.04E-05 |
| GO:0009617 | response to bacterium                                        | 2.35E-05 |
| GO:0043202 | lysosomal lumen                                              | 2.41E-05 |
| GO:0043230 | extracellular organelle                                      | 2.53E-05 |
| GO:0002285 | lymphocyte activation involved in immune response            | 2.55E-05 |
| GO:0002697 | regulation of immune effector process                        | 2.58E-05 |
| GO:1903561 | extracellular vesicle                                        | 2.88E-05 |
| GO:0001906 | cell killing                                                 | 2.93E-05 |
| GO:0032695 | negative regulation of interleukin-12 production             | 3.29E-05 |
| GO:0150076 | neuroinflammatory response                                   | 3.36E-05 |
| GO:0048598 | embryonic morphogenesis                                      | 3.54E-05 |
| GO:0043549 | regulation of kinase activity                                | 3.54E-05 |
| GO:0051251 | positive regulation of lymphocyte activation                 | 3.62E-05 |
| GO:0098636 | protein complex involved in cell adhesion                    | 3.74E-05 |
| GO:0042116 | macrophage activation                                        | 4.29E-05 |
| GO:0050921 | positive regulation of chemotaxis                            | 4.43E-05 |
| GO:0006915 | apoptotic process                                            | 4.60E-05 |
| GO:0008305 | integrin complex                                             | 4.63E-05 |
| GO:0000003 | reproduction                                                 | 4.64E-05 |
| GO:0022414 | reproductive process                                         | 5.12E-05 |
| GO:0016192 | vesicle-mediated transport                                   | 5.25E-05 |
| GO:0002709 | regulation of T cell mediated immunity                       | 5.36E-05 |
| GO:0060548 | negative regulation of cell death                            | 5.42E-05 |
| GO:0033002 | muscle cell proliferation                                    | 5.86E-05 |
| GO:0001101 | response to acid chemical                                    | 6.19E-05 |
| GO:0051216 | cartilage development                                        | 6.36E-05 |
| GO:0097237 | cellular response to toxic substance                         | 6.58E-05 |
| GO:0035690 | cellular response to drug                                    | 7.07E-05 |
| GO:0150077 | regulation of neuroinflammatory response                     | 8.46E-05 |
| GO:0030099 | myeloid cell differentiation                                 | 8.54E-05 |
| GO:0046632 | alpha-beta T cell differentiation                            | 9.21E-05 |
| GO:0051338 | regulation of transferase activity                           | 9.25E-05 |
| GO:0002690 | positive regulation of leukocyte chemotaxis                  | 9.25E-05 |
| GO:0045087 | innate immune response                                       | 9.91E-05 |
| GO:0048144 | fibroblast proliferation                                     | 0.0001   |
| GO:2000106 | regulation of leukocyte apoptotic process                    | 0.0001   |
| GO:0046635 | positive regulation of alpha-beta T cell activation          | 0.0001   |
| GO:0045682 | regulation of epidermis development                          | 0.00011  |
| GO:0034774 | secretory granule lumen                                      | 0.00012  |
| GO:0101003 | ficolin-1-rich granule membrane                              | 0.00012  |
| GO:0043030 | regulation of macrophage activation                          | 0.00012  |
| GO:0002820 | negative regulation of adaptive immune response              | 0.00012  |
| GO:0072593 | reactive oxygen species metabolic process                    | 0.00012  |
| GO:0035710 | CD4-positive, alpha-beta T cell activation                   | 0.00013  |
| GO:0012506 | vesicle membrane                                             | 0.00014  |
| GO:0010035 | response to inorganic substance                              | 0.00015  |
| GO:0052548 | regulation of endopeptidase activity                         | 0.00016  |
| GO:0002705 | positive regulation of leukocyte mediated immunity           | 0.00018  |
| GO:0002704 | negative regulation of leukocyte mediated immunity           | 0.00018  |
| GO:0090183 | regulation of kidney development                             | 0.00018  |
| GO:0101002 | ficolin-1-rich granule                                       | 0.00018  |
| GO:0032755 | positive regulation of interleukin-6 production              | 0.0002   |
| GO:0006793 | phosphorus metabolic process                                 | 0.0002   |
| GO:0048145 | regulation of fibroblast proliferation                       | 0.0002   |
| GO:0014070 | response to organic cyclic compound                          | 0.0002   |
| GO:0052547 | regulation of peptidase activity                             | 0.0002   |
| GO:0051246 | regulation of protein metabolic process                      | 0.00022  |
| GO:0005775 | vacuolar lumen                                               | 0.00023  |
| GO:1903557 | positive regulation of tumor necrosis factor superfamily cyt | 0.00024  |
| GO:0002702 | positive regulation of production of molecular mediator of i | 0.00024  |

|            |                                                                         |         |
|------------|-------------------------------------------------------------------------|---------|
| GO:0045730 | respiratory burst                                                       | 0.00024 |
| GO:0034113 | heterotypic cell-cell adhesion                                          | 0.00024 |
| GO:0006979 | response to oxidative stress                                            | 0.00025 |
| GO:0006796 | phosphate-containing compound metabolic process                         | 0.00025 |
| GO:0002698 | negative regulation of immune effector process                          | 0.00026 |
| GO:0006801 | superoxide metabolic process                                            | 0.00026 |
| GO:0042554 | superoxide anion generation                                             | 0.00026 |
| GO:1903706 | regulation of hemopoiesis                                               | 0.00026 |
| GO:0031343 | positive regulation of cell killing                                     | 0.00028 |
| GO:0060205 | cytoplasmic vesicle lumen                                               | 0.00028 |
| GO:0045165 | cell fate commitment                                                    | 0.00031 |
| GO:0050730 | regulation of peptidyl-tyrosine phosphorylation                         | 0.00031 |
| GO:0031983 | vesicle lumen                                                           | 0.00032 |
| GO:0030100 | regulation of endocytosis                                               | 0.00032 |
| GO:0045604 | regulation of epidermal cell differentiation                            | 0.00032 |
| GO:0050731 | positive regulation of peptidyl-tyrosine phosphorylation                | 0.00034 |
| GO:0051128 | regulation of cellular component organization                           | 0.00036 |
| GO:0043207 | response to external biotic stimulus                                    | 0.00036 |
| GO:0009607 | response to biotic stimulus                                             | 0.00037 |
| GO:0030659 | cytoplasmic vesicle membrane                                            | 0.00038 |
| GO:0098805 | whole membrane                                                          | 0.00041 |
| GO:0046633 | alpha-beta T cell proliferation                                         | 0.00041 |
| GO:0046637 | regulation of alpha-beta T cell differentiation                         | 0.00042 |
| GO:0042088 | T-helper 1 type immune response                                         | 0.00042 |
| GO:0051707 | response to other organism                                              | 0.00046 |
| GO:0032637 | interleukin-8 production                                                | 0.00046 |
| GO:0032677 | regulation of interleukin-8 production                                  | 0.00046 |
| GO:0035580 | specific granule lumen                                                  | 0.00047 |
| GO:0002313 | mature B cell differentiation involved in immune response               | 0.00048 |
| GO:0034599 | cellular response to oxidative stress                                   | 0.00048 |
| GO:0032760 | positive regulation of tumor necrosis factor production                 | 0.00048 |
| GO:2000379 | positive regulation of reactive oxygen species metabolic process        | 0.00048 |
| GO:0030666 | endocytic vesicle membrane                                              | 0.0005  |
| GO:0071492 | cellular response to UV-A                                               | 0.00051 |
| GO:0048659 | smooth muscle cell proliferation                                        | 0.00052 |
| GO:0032613 | interleukin-10 production                                               | 0.00054 |
| GO:0032653 | regulation of interleukin-10 production                                 | 0.00054 |
| GO:0001618 | virus receptor activity                                                 | 0.00056 |
| GO:0104005 | hijacked molecular function                                             | 0.00056 |
| GO:0072677 | eosinophil migration                                                    | 0.00057 |
| GO:0002335 | mature B cell differentiation                                           | 0.00058 |
| GO:0048660 | regulation of smooth muscle cell proliferation                          | 0.00058 |
| GO:0046638 | positive regulation of alpha-beta T cell differentiation                | 0.00059 |
| GO:0043300 | regulation of leukocyte degranulation                                   | 0.0006  |
| GO:0071356 | cellular response to tumor necrosis factor                              | 0.0006  |
| GO:0001910 | regulation of leukocyte mediated cytotoxicity                           | 0.0006  |
| GO:0044092 | negative regulation of molecular function                               | 0.00062 |
| GO:0048661 | positive regulation of smooth muscle cell proliferation                 | 0.00067 |
| GO:0045807 | positive regulation of endocytosis                                      | 0.00068 |
| GO:0044437 | vacuolar part                                                           | 0.00083 |
| GO:0030203 | glycosaminoglycan metabolic process                                     | 0.00087 |
| GO:0043281 | regulation of cysteine-type endopeptidase activity involved in          | 0.00093 |
| GO:0048568 | embryonic organ development                                             | 0.00095 |
| GO:0043069 | negative regulation of programmed cell death                            | 0.00105 |
| GO:0043367 | CD4-positive, alpha-beta T cell differentiation                         | 0.0011  |
| GO:0007568 | aging                                                                   | 0.0011  |
| GO:0031960 | response to corticosteroid                                              | 0.00111 |
| GO:0000940 | condensed chromosome outer kinetochore                                  | 0.00113 |
| GO:0050664 | oxidoreductase activity, acting on NAD(P)H, oxygen as acceptor          | 0.00116 |
| GO:0045058 | T cell selection                                                        | 0.0012  |
| GO:0001913 | T cell mediated cytotoxicity                                            | 0.00139 |
| GO:0070555 | response to interleukin-1                                               | 0.00139 |
| GO:0034612 | response to tumor necrosis factor                                       | 0.0014  |
| GO:0051983 | regulation of chromosome segregation                                    | 0.00145 |
| GO:0002228 | natural killer cell mediated immunity                                   | 0.00145 |
| GO:0043020 | NADPH oxidase complex                                                   | 0.00149 |
| GO:0043280 | positive regulation of cysteine-type endopeptidase activity involved in | 0.00154 |
| GO:0042093 | T-helper cell differentiation                                           | 0.0016  |
| GO:0002708 | positive regulation of lymphocyte mediated immunity                     | 0.00165 |
| GO:0000302 | response to reactive oxygen species                                     | 0.00167 |
| GO:2000116 | regulation of cysteine-type endopeptidase activity involved in          | 0.00169 |
| GO:0032729 | positive regulation of interferon-gamma production                      | 0.00171 |

|            |                                                               |         |
|------------|---------------------------------------------------------------|---------|
| GO:2000401 | regulation of lymphocyte migration                            | 0.00176 |
| GO:0032642 | regulation of chemokine production                            | 0.00176 |
| GO:0031100 | animal organ regeneration                                     | 0.00176 |
| GO:0002823 | negative regulation of adaptive immune response based on s    | 0.00177 |
| GO:0030139 | endocytic vesicle                                             | 0.00182 |
| GO:0097028 | dendritic cell differentiation                                | 0.00187 |
| GO:0032722 | positive regulation of chemokine production                   | 0.00187 |
| GO:0032615 | interleukin-12 production                                     | 0.0019  |
| GO:0032655 | regulation of interleukin-12 production                       | 0.0019  |
| GO:2000404 | regulation of T cell migration                                | 0.00196 |
| GO:0002821 | positive regulation of adaptive immune response               | 0.00198 |
| GO:0071887 | leukocyte apoptotic process                                   | 0.00198 |
| GO:0043405 | regulation of MAP kinase activity                             | 0.00206 |
| GO:0043066 | negative regulation of apoptotic process                      | 0.00215 |
| GO:0032602 | chemokine production                                          | 0.00217 |
| GO:0046849 | bone remodeling                                               | 0.00217 |
| GO:1903046 | meiotic cell cycle process                                    | 0.00233 |
| GO:0032611 | interleukin-1 beta production                                 | 0.00245 |
| GO:0032651 | regulation of interleukin-1 beta production                   | 0.00245 |
| GO:0071900 | regulation of protein serine/threonine kinase activity        | 0.00248 |
| GO:2000377 | regulation of reactive oxygen species metabolic process       | 0.00262 |
| GO:0034614 | cellular response to reactive oxygen species                  | 0.00263 |
| GO:0045088 | regulation of innate immune response                          | 0.00264 |
| GO:0002294 | CD4-positive, alpha-beta T cell differentiation involved in i | 0.00271 |
| GO:0002250 | adaptive immune response                                      | 0.00294 |
| GO:0002407 | dendritic cell chemotaxis                                     | 0.00294 |
| GO:0034381 | plasma lipoprotein particle clearance                         | 0.00304 |
| GO:0002825 | regulation of T-helper 1 type immune response                 | 0.00309 |
| GO:0002824 | positive regulation of adaptive immune response based on s    | 0.00313 |
| GO:0036336 | dendritic cell migration                                      | 0.00314 |
| GO:0007059 | chromosome segregation                                        | 0.00329 |
| GO:0051234 | establishment of localization                                 | 0.00347 |
| GO:0002287 | alpha-beta T cell activation involved in immune response      | 0.00347 |
| GO:0002293 | alpha-beta T cell differentiation involved in immune respon   | 0.00347 |
| GO:0000778 | condensed nuclear chromosome kinetochore                      | 0.00355 |
| GO:0000780 | condensed nuclear chromosome, centromeric region              | 0.00355 |
| GO:0030225 | macrophage differentiation                                    | 0.00356 |
| GO:0009628 | response to abiotic stimulus                                  | 0.00401 |
| GO:0048020 | CCR chemokine receptor binding                                | 0.00436 |
| GO:1904724 | tertiary granule lumen                                        | 0.00437 |
| GO:0046640 | regulation of alpha-beta T cell proliferation                 | 0.00451 |
| GO:0048146 | positive regulation of fibroblast proliferation               | 0.00481 |
| GO:0071236 | cellular response to antibiotic                               | 0.00487 |
| GO:2000514 | regulation of CD4-positive, alpha-beta T cell activation      | 0.00496 |
| GO:0071347 | cellular response to interleukin-1                            | 0.00497 |
| GO:0002224 | toll-like receptor signaling pathway                          | 0.00522 |
| GO:0002707 | negative regulation of lymphocyte mediated immunity           | 0.00523 |
| GO:0048732 | gland development                                             | 0.00553 |
| GO:0010965 | regulation of mitotic sister chromatid separation             | 0.00555 |
| GO:0060556 | regulation of vitamin D biosynthetic process                  | 0.00567 |
| GO:0048245 | eosinophil chemotaxis                                         | 0.00579 |
| GO:0002312 | B cell activation involved in immune response                 | 0.00608 |
| GO:0002292 | T cell differentiation involved in immune response            | 0.00624 |
| GO:0036021 | endolysosome lumen                                            | 0.00626 |
| GO:0140013 | meiotic nuclear division                                      | 0.00649 |
| GO:0032612 | interleukin-1 production                                      | 0.00655 |
| GO:0032652 | regulation of interleukin-1 production                        | 0.00655 |
| GO:1901216 | positive regulation of neuron death                           | 0.00666 |
| GO:0002468 | dendritic cell antigen processing and presentation            | 0.00682 |
| GO:0071402 | cellular response to lipoprotein particle stimulus            | 0.00685 |
| GO:2000108 | positive regulation of leukocyte apoptotic process            | 0.00692 |
| GO:0045862 | positive regulation of proteolysis                            | 0.00695 |
| GO:0045089 | positive regulation of innate immune response                 | 0.00715 |
| GO:0019915 | lipid storage                                                 | 0.00743 |
| GO:0010466 | negative regulation of peptidase activity                     | 0.00774 |
| GO:0007091 | metaphase/anaphase transition of mitotic cell cycle           | 0.00782 |
| GO:1903556 | negative regulation of tumor necrosis factor superfamily cy   | 0.00782 |
| GO:0010951 | negative regulation of endopeptidase activity                 | 0.00782 |
| GO:0045123 | cellular extravasation                                        | 0.00782 |
| GO:0050778 | positive regulation of immune response                        | 0.00796 |
| GO:0045684 | positive regulation of epidermis development                  | 0.00815 |
| GO:0071675 | regulation of mononuclear cell migration                      | 0.0083  |

|            |                                                               |         |
|------------|---------------------------------------------------------------|---------|
| GO:0051321 | meiotic cell cycle                                            | 0.00833 |
| GO:1902106 | negative regulation of leukocyte differentiation              | 0.00834 |
| GO:0046718 | viral entry into host cell                                    | 0.0085  |
| GO:0034121 | regulation of toll-like receptor signaling pathway            | 0.00858 |
| GO:0051306 | mitotic sister chromatid separation                           | 0.00871 |
| GO:0043086 | negative regulation of catalytic activity                     | 0.00915 |
| GO:0046514 | ceramide catabolic process                                    | 0.0095  |
| GO:0042368 | vitamin D biosynthetic process                                | 0.0095  |
| GO:0045335 | phagocytic vesicle                                            | 0.00963 |
| GO:0055094 | response to lipoprotein particle                              | 0.01005 |
| GO:0030260 | entry into host cell                                          | 0.01012 |
| GO:0044409 | entry into host                                               | 0.01012 |
| GO:0051806 | entry into cell of other organism involved in symbiotic inte  | 0.01012 |
| GO:0070301 | cellular response to hydrogen peroxide                        | 0.01012 |
| GO:0010883 | regulation of lipid storage                                   | 0.01066 |
| GO:0032689 | negative regulation of interferon-gamma production            | 0.01086 |
| GO:0045616 | regulation of keratinocyte differentiation                    | 0.01086 |
| GO:2000816 | negative regulation of mitotic sister chromatid separation    | 0.01086 |
| GO:0030071 | regulation of mitotic metaphase/anaphase transition           | 0.01089 |
| GO:0032720 | negative regulation of tumor necrosis factor production       | 0.01089 |
| GO:0032731 | positive regulation of interleukin-1 beta production          | 0.01089 |
| GO:0051828 | entry into other organism involved in symbiotic interaction   | 0.0116  |
| GO:0030278 | regulation of ossification                                    | 0.01167 |
| GO:0032733 | positive regulation of interleukin-10 production              | 0.01177 |
| GO:1905818 | regulation of chromosome separation                           | 0.01194 |
| GO:0019377 | glycolipid catabolic process                                  | 0.01228 |
| GO:0071407 | cellular response to organic cyclic compound                  | 0.01239 |
| GO:0002286 | T cell activation involved in immune response                 | 0.01254 |
| GO:0010742 | macrophage derived foam cell differentiation                  | 0.01267 |
| GO:0090077 | foam cell differentiation                                     | 0.01267 |
| GO:0071496 | cellular response to external stimulus                        | 0.01284 |
| GO:0016175 | superoxide-generating NADPH oxidase activity                  | 0.01302 |
| GO:0010985 | negative regulation of lipoprotein particle clearance         | 0.01305 |
| GO:0002460 | adaptive immune response based on somatic recombination       | 0.01365 |
| GO:0010878 | cholesterol storage                                           | 0.014   |
| GO:0030050 | vesicle transport along actin filament                        | 0.014   |
| GO:0032715 | negative regulation of interleukin-6 production               | 0.01429 |
| GO:0010575 | positive regulation of vascular endothelial growth factor pr  | 0.01473 |
| GO:0046641 | positive regulation of alpha-beta T cell proliferation        | 0.01474 |
| GO:0044784 | metaphase/anaphase transition of cell cycle                   | 0.01505 |
| GO:0043370 | regulation of CD4-positive, alpha-beta T cell differentiation | 0.01505 |
| GO:1903409 | reactive oxygen species biosynthetic process                  | 0.01523 |
| GO:0031663 | lipopolysaccharide-mediated signaling pathway                 | 0.01524 |
| GO:0045841 | negative regulation of mitotic metaphase/anaphase transitio   | 0.01548 |
| GO:0000779 | condensed chromosome, centromeric region                      | 0.01635 |
| GO:1905953 | negative regulation of lipid localization                     | 0.01676 |
| GO:0046466 | membrane lipid catabolic process                              | 0.01691 |
| GO:2000403 | positive regulation of lymphocyte migration                   | 0.01691 |
| GO:2000516 | positive regulation of CD4-positive, alpha-beta T cell activ  | 0.01691 |
| GO:0002883 | regulation of hypersensitivity                                | 0.01719 |
| GO:0046479 | glycosphingolipid catabolic process                           | 0.01757 |
| GO:0033045 | regulation of sister chromatid segregation                    | 0.01834 |
| GO:1905819 | negative regulation of chromosome separation                  | 0.0184  |
| GO:0001890 | placenta development                                          | 0.0187  |
| GO:0031295 | T cell costimulation                                          | 0.01883 |
| GO:0051704 | multi-organism process                                        | 0.01903 |
| GO:0044877 | protein-containing complex binding                            | 0.01926 |
| GO:0000819 | sister chromatid segregation                                  | 0.01932 |
| GO:0010743 | regulation of macrophage derived foam cell differentiation    | 0.01938 |
| GO:1905521 | regulation of macrophage migration                            | 0.02027 |
| GO:1902099 | regulation of metaphase/anaphase transition of cell cycle     | 0.02057 |
| GO:0010915 | regulation of very-low-density lipoprotein particle clearanc  | 0.02057 |
| GO:0010916 | negative regulation of very-low-density lipoprotein particle  | 0.02057 |
| GO:0038156 | interleukin-3-mediated signaling pathway                      | 0.02057 |
| GO:0045839 | negative regulation of mitotic nuclear division               | 0.02077 |
| GO:0070228 | regulation of lymphocyte apoptotic process                    | 0.02077 |
| GO:0002827 | positive regulation of T-helper 1 type immune response        | 0.02142 |
| GO:0007094 | mitotic spindle assembly checkpoint                           | 0.02167 |
| GO:0071173 | spindle assembly checkpoint                                   | 0.02167 |
| GO:0071174 | mitotic spindle checkpoint                                    | 0.02167 |
| GO:0046209 | nitric oxide metabolic process                                | 0.02178 |
| GO:1901214 | regulation of neuron death                                    | 0.02178 |

|            |                                                             |         |
|------------|-------------------------------------------------------------|---------|
| GO:0000793 | condensed chromosome                                        | 0.02229 |
| GO:0001774 | microglial cell activation                                  | 0.02297 |
| GO:0033048 | negative regulation of mitotic sister chromatid segregation | 0.02297 |
| GO:0061900 | glial cell activation                                       | 0.0232  |
| GO:0010573 | vascular endothelial growth factor production               | 0.02364 |
| GO:0008630 | intrinsic apoptotic signaling pathway in response to DNA d  | 0.02367 |
| GO:0006569 | tryptophan catabolic process                                | 0.02436 |
| GO:0042436 | indole-containing compound catabolic process                | 0.02436 |
| GO:0043301 | negative regulation of leukocyte degranulation              | 0.02436 |
| GO:0045060 | negative thymic T cell selection                            | 0.02436 |
| GO:0046218 | indolalkylamine catabolic process                           | 0.02436 |
| GO:1902510 | regulation of apoptotic DNA fragmentation                   | 0.02436 |
| GO:0033047 | regulation of mitotic sister chromatid segregation          | 0.02437 |
| GO:0097006 | regulation of plasma lipoprotein particle levels            | 0.02446 |
| GO:0042113 | B cell activation                                           | 0.02522 |
| GO:0030851 | granulocyte differentiation                                 | 0.02522 |
| GO:1902100 | negative regulation of metaphase/anaphase transition of cel | 0.02522 |
| GO:0003338 | metanephros morphogenesis                                   | 0.02533 |
| GO:0030149 | sphingolipid catabolic process                              | 0.02533 |
| GO:0033077 | T cell differentiation in thymus                            | 0.02554 |
| GO:2001057 | reactive nitrogen species metabolic process                 | 0.02554 |
| GO:1905952 | regulation of lipid localization                            | 0.0256  |
| GO:0001228 | DNA-binding transcription activator activity, RNA polymer   | 0.02568 |
| GO:0038024 | cargo receptor activity                                     | 0.02593 |
| GO:0030316 | osteoclast differentiation                                  | 0.02595 |
| GO:0098813 | nuclear chromosome segregation                              | 0.02627 |
| GO:1905954 | positive regulation of lipid localization                   | 0.02656 |
| GO:0000942 | condensed nuclear chromosome outer kinetochore              | 0.02728 |
| GO:0031294 | lymphocyte costimulation                                    | 0.02742 |
| GO:0031577 | spindle checkpoint                                          | 0.02786 |
| GO:0036019 | endolysosome                                                | 0.02796 |
| GO:0034644 | cellular response to UV                                     | 0.02875 |
| GO:0030857 | negative regulation of epithelial cell differentiation      | 0.02875 |
| GO:0072540 | T-helper 17 cell lineage commitment                         | 0.02875 |
| GO:0043627 | response to estrogen                                        | 0.03043 |
| GO:0051383 | kinetochore organization                                    | 0.03043 |
| GO:0034383 | low-density lipoprotein particle clearance                  | 0.03066 |
| GO:0046890 | regulation of lipid biosynthetic process                    | 0.03103 |
| GO:0007010 | cytoskeleton organization                                   | 0.03255 |
| GO:0006809 | nitric oxide biosynthetic process                           | 0.03265 |
| GO:0007135 | meiosis II                                                  | 0.03425 |
| GO:0034447 | very-low-density lipoprotein particle clearance             | 0.03425 |
| GO:0045144 | meiotic sister chromatid segregation                        | 0.03425 |
| GO:0051177 | meiotic sister chromatid cohesion                           | 0.03425 |
| GO:0061983 | meiosis II cell cycle process                               | 0.03425 |
| GO:0030301 | cholesterol transport                                       | 0.03449 |
| GO:0030888 | regulation of B cell proliferation                          | 0.03505 |
| GO:0051784 | negative regulation of nuclear division                     | 0.03505 |
| GO:0034142 | toll-like receptor 4 signaling pathway                      | 0.03534 |
| GO:0033046 | negative regulation of sister chromatid segregation         | 0.03555 |
| GO:2000406 | positive regulation of T cell migration                     | 0.03637 |
| GO:0045428 | regulation of nitric oxide biosynthetic process             | 0.03733 |
| GO:0038187 | pattern recognition receptor activity                       | 0.03821 |
| GO:0051783 | regulation of nuclear division                              | 0.03889 |
| GO:0031670 | cellular response to nutrient                               | 0.03889 |
| GO:0033344 | cholesterol efflux                                          | 0.03928 |
| GO:1903426 | regulation of reactive oxygen species biosynthetic process  | 0.03933 |
| GO:0002369 | T cell cytokine production                                  | 0.03944 |
| GO:0002724 | regulation of T cell cytokine production                    | 0.03944 |
| GO:1900745 | positive regulation of p38MAPK cascade                      | 0.03944 |
| GO:0000775 | chromosome, centromeric region                              | 0.0405  |
| GO:0002761 | regulation of myeloid leukocyte differentiation             | 0.0416  |
| GO:0000070 | mitotic sister chromatid segregation                        | 0.04163 |
| GO:0097190 | apoptotic signaling pathway                                 | 0.04175 |
| GO:0030656 | regulation of vitamin metabolic process                     | 0.04175 |
| GO:1905517 | macrophage migration                                        | 0.04175 |
| GO:0043369 | CD4-positive or CD8-positive, alpha-beta T cell lineage cor | 0.04175 |
| GO:0002269 | leukocyte activation involved in inflammatory response      | 0.04371 |
| GO:0010888 | negative regulation of lipid storage                        | 0.04407 |
| GO:0043373 | CD4-positive, alpha-beta T cell lineage commitment          | 0.04407 |
| GO:0042362 | fat-soluble vitamin biosynthetic process                    | 0.04467 |
| GO:0002295 | T-helper cell lineage commitment                            | 0.04483 |

|            |                                                               |         |
|------------|---------------------------------------------------------------|---------|
| GO:0010744 | positive regulation of macrophage derived foam cell differ    | 0.04483 |
| GO:0043031 | negative regulation of macrophage activation                  | 0.04483 |
| GO:0045591 | positive regulation of regulatory T cell differentiation      | 0.04483 |
| GO:0045618 | positive regulation of keratinocyte differentiation           | 0.04483 |
| GO:0005766 | primary lysosome                                              | 0.04524 |
| GO:0042582 | azurophil granule                                             | 0.04524 |
| GO:0005765 | lysosomal membrane                                            | 0.04524 |
| GO:0098852 | lytic vacuole membrane                                        | 0.04524 |
| GO:0000280 | nuclear division                                              | 0.04652 |
| GO:0002711 | positive regulation of T cell mediated immunity               | 0.04658 |
| GO:1902930 | regulation of alcohol biosynthetic process                    | 0.04658 |
| GO:0043615 | astrocyte cell migration                                      | 0.04658 |
| GO:0060558 | regulation of calcidiol 1-monooxygenase activity              | 0.04658 |
| GO:0043372 | positive regulation of CD4-positive, alpha-beta T cell differ | 0.04678 |
| GO:0071295 | cellular response to vitamin                                  | 0.04678 |
| GO:0071214 | cellular response to abiotic stimulus                         | 0.04782 |
| GO:0104004 | cellular response to environmental stimulus                   | 0.04782 |
| GO:0045824 | negative regulation of innate immune response                 | 0.04859 |
| GO:0043368 | positive T cell selection                                     | 0.04886 |

**GelMA\_HA\_Trend Only**

|            |                                                             |          |
|------------|-------------------------------------------------------------|----------|
| GO:0007186 | G protein-coupled receptor signaling pathway                | 4.83E-07 |
| GO:0014046 | dopamine secretion                                          | 3.11E-06 |
| GO:0014059 | regulation of dopamine secretion                            | 3.11E-06 |
| GO:0043169 | cation binding                                              | 1.82E-05 |
| GO:0031256 | leading edge membrane                                       | 2.00E-05 |
| GO:1903818 | positive regulation of voltage-gated potassium channel acti | 4.28E-05 |
| GO:0005251 | delayed rectifier potassium channel activity                | 4.39E-05 |
| GO:0019229 | regulation of vasoconstriction                              | 0.00011  |
| GO:0046872 | metal ion binding                                           | 0.00011  |
| GO:0015696 | ammonium transport                                          | 0.00012  |
| GO:2001023 | regulation of response to drug                              | 0.00013  |
| GO:0009925 | basal plasma membrane                                       | 0.00013  |
| GO:0015459 | potassium channel regulator activity                        | 0.00015  |
| GO:0005922 | connexin complex                                            | 0.00021  |
| GO:0043167 | ion binding                                                 | 0.00023  |
| GO:0060041 | retina development in camera-type eye                       | 0.00028  |
| GO:0022804 | active transmembrane transporter activity                   | 0.00028  |
| GO:0031279 | regulation of cyclase activity                              | 0.0003   |
| GO:0045178 | basal part of cell                                          | 0.00035  |
| GO:0097731 | 9+0 non-motile cilium                                       | 0.00036  |
| GO:0003351 | epithelial cilium movement                                  | 0.00045  |
| GO:0051954 | positive regulation of amine transport                      | 0.00045  |
| GO:0015291 | secondary active transmembrane transporter activity         | 0.00046  |
| GO:0060359 | response to ammonium ion                                    | 0.00047  |
| GO:0098688 | parallel fiber to Purkinje cell synapse                     | 0.00054  |
| GO:0005921 | gap junction                                                | 0.00058  |
| GO:0007274 | neuromuscular synaptic transmission                         | 0.00071  |
| GO:0005243 | gap junction channel activity                               | 0.00072  |
| GO:0060074 | synapse maturation                                          | 0.00089  |
| GO:0010107 | potassium ion import                                        | 0.00096  |
| GO:0032591 | dendritic spine membrane                                    | 0.00102  |
| GO:0002862 | negative regulation of inflammatory response to antigenic s | 0.00127  |
| GO:0021799 | cerebral cortex radially oriented cell migration            | 0.00139  |
| GO:0008306 | associative learning                                        | 0.00144  |
| GO:0097733 | photoreceptor cell cilium                                   | 0.00155  |
| GO:0015293 | symporter activity                                          | 0.00158  |
| GO:0008331 | high voltage-gated calcium channel activity                 | 0.0016   |
| GO:0022829 | wide pore channel activity                                  | 0.00162  |
| GO:0048168 | regulation of neuronal synaptic plasticity                  | 0.00165  |
| GO:0140115 | export across plasma membrane                               | 0.00165  |
| GO:0051928 | positive regulation of calcium ion transport                | 0.0019   |
| GO:0001964 | startle response                                            | 0.00198  |
| GO:0050951 | sensory perception of temperature stimulus                  | 0.00198  |
| GO:0048265 | response to pain                                            | 0.0022   |
| GO:0005326 | neurotransmitter transporter activity                       | 0.0023   |
| GO:0031032 | actomyosin structure organization                           | 0.00234  |
| GO:0005342 | organic acid transmembrane transporter activity             | 0.0024   |
| GO:0097091 | synaptic vesicle clustering                                 | 0.00243  |
| GO:0060042 | retina morphogenesis in camera-type eye                     | 0.00253  |
| GO:0021537 | telencephalon development                                   | 0.00268  |
| GO:1903539 | protein localization to postsynaptic membrane               | 0.00274  |
| GO:0051955 | regulation of amino acid transport                          | 0.0028   |

|            |                                                                            |         |
|------------|----------------------------------------------------------------------------|---------|
| GO:0043177 | organic acid binding                                                       | 0.00293 |
| GO:0008514 | organic anion transmembrane transporter activity                           | 0.00297 |
| GO:0043271 | negative regulation of ion transport                                       | 0.00301 |
| GO:0007196 | adenylate cyclase-inhibiting G protein-coupled glutamate receptor activity | 0.00301 |
| GO:1990504 | dense core granule exocytosis                                              | 0.00301 |
| GO:0003333 | amino acid transmembrane transport                                         | 0.00301 |
| GO:0034776 | response to histamine                                                      | 0.00308 |
| GO:0060452 | positive regulation of cardiac muscle contraction                          | 0.00308 |
| GO:0005283 | amino acid:sodium symporter activity                                       | 0.00314 |
| GO:0005883 | neurofilament                                                              | 0.00325 |
| GO:0046943 | carboxylic acid transmembrane transporter activity                         | 0.00329 |
| GO:0046068 | cGMP metabolic process                                                     | 0.00345 |
| GO:0060004 | reflex                                                                     | 0.00345 |
| GO:0002790 | peptide secretion                                                          | 0.00354 |
| GO:0015238 | drug transmembrane transporter activity                                    | 0.00369 |
| GO:0001640 | adenylate cyclase inhibiting G protein-coupled glutamate receptor activity | 0.00369 |
| GO:0098988 | G protein-coupled glutamate receptor activity                              | 0.00369 |
| GO:0030551 | cyclic nucleotide binding                                                  | 0.00369 |
| GO:0019897 | extrinsic component of plasma membrane                                     | 0.0037  |
| GO:1904861 | excitatory synapse assembly                                                | 0.00403 |
| GO:0050795 | regulation of behavior                                                     | 0.00404 |
| GO:0071875 | adrenergic receptor signaling pathway                                      | 0.00432 |
| GO:0043083 | synaptic cleft                                                             | 0.00433 |
| GO:0045761 | regulation of adenylate cyclase activity                                   | 0.00453 |
| GO:0086019 | cell-cell signaling involved in cardiac conduction                         | 0.00453 |
| GO:0045776 | negative regulation of blood pressure                                      | 0.00467 |
| GO:0044060 | regulation of endocrine process                                            | 0.00472 |
| GO:1901385 | regulation of voltage-gated calcium channel activity                       | 0.00472 |
| GO:1903531 | negative regulation of secretion by cell                                   | 0.00472 |
| GO:0044305 | calyx of Held                                                              | 0.00506 |
| GO:0089717 | spanning component of membrane                                             | 0.00506 |
| GO:0097449 | astrocyte projection                                                       | 0.00506 |
| GO:0098992 | neuronal dense core vesicle                                                | 0.0052  |
| GO:1902259 | regulation of delayed rectifier potassium channel activity                 | 0.00549 |
| GO:0051592 | response to calcium ion                                                    | 0.00663 |
| GO:0042135 | neurotransmitter catabolic process                                         | 0.00699 |
| GO:0051339 | regulation of lyase activity                                               | 0.00712 |
| GO:1904862 | inhibitory synapse assembly                                                | 0.00728 |
| GO:0045926 | negative regulation of growth                                              | 0.00744 |
| GO:0007263 | nitric oxide mediated signal transduction                                  | 0.00744 |
| GO:0009065 | glutamine family amino acid catabolic process                              | 0.00744 |
| GO:1901018 | positive regulation of potassium ion transmembrane transport               | 0.00744 |
| GO:0030286 | dynein complex                                                             | 0.00749 |
| GO:0042551 | neuron maturation                                                          | 0.0076  |
| GO:0051953 | negative regulation of amine transport                                     | 0.00781 |
| GO:0098664 | G protein-coupled serotonin receptor signaling pathway                     | 0.00781 |
| GO:0030324 | lung development                                                           | 0.0081  |
| GO:1903523 | negative regulation of blood circulation                                   | 0.0082  |
| GO:0035633 | maintenance of permeability of blood-brain barrier                         | 0.00821 |
| GO:0098810 | neurotransmitter reuptake                                                  | 0.00821 |
| GO:0006940 | regulation of smooth muscle contraction                                    | 0.00834 |
| GO:0072347 | response to anesthetic                                                     | 0.00941 |
| GO:0051051 | negative regulation of transport                                           | 0.00946 |
| GO:0008191 | metalloendopeptidase inhibitor activity                                    | 0.00964 |
| GO:0004993 | G protein-coupled serotonin receptor activity                              | 0.01072 |
| GO:0005184 | neuropeptide hormone activity                                              | 0.01072 |
| GO:0099589 | serotonin receptor activity                                                | 0.01072 |
| GO:0002526 | acute inflammatory response                                                | 0.01095 |
| GO:0086067 | AV node cell to bundle of His cell communication                           | 0.01127 |
| GO:0030323 | respiratory tube development                                               | 0.01127 |
| GO:0036157 | outer dynein arm                                                           | 0.01163 |
| GO:0044327 | dendritic spine head                                                       | 0.01163 |
| GO:1990454 | L-type voltage-gated calcium channel complex                               | 0.01163 |
| GO:0008569 | ATP-dependent microtubule motor activity, minus-end-directed               | 0.01201 |
| GO:0098796 | membrane protein complex                                                   | 0.01206 |
| GO:0035929 | steroid hormone secretion                                                  | 0.01207 |
| GO:0045933 | positive regulation of muscle contraction                                  | 0.0121  |
| GO:0046717 | acid secretion                                                             | 0.0121  |
| GO:0015807 | L-amino acid transport                                                     | 0.01257 |
| GO:2001222 | regulation of neuron migration                                             | 0.01257 |
| GO:0015701 | bicarbonate transport                                                      | 0.01308 |
| GO:0016048 | detection of temperature stimulus                                          | 0.01359 |

|            |                                                              |         |
|------------|--------------------------------------------------------------|---------|
| GO:0021801 | cerebral cortex radial glia guided migration                 | 0.01359 |
| GO:0022030 | telencephalon glial cell migration                           | 0.01359 |
| GO:0071880 | adenylate cyclase-activating adrenergic receptor signaling p | 0.01359 |
| GO:1903859 | regulation of dendrite extension                             | 0.01359 |
| GO:0007340 | acrosome reaction                                            | 0.01373 |
| GO:0042417 | dopamine metabolic process                                   | 0.01373 |
| GO:0003002 | regionalization                                              | 0.01395 |
| GO:0097484 | dendrite extension                                           | 0.01399 |
| GO:0099622 | cardiac muscle cell membrane repolarization                  | 0.01399 |
| GO:0007210 | serotonin receptor signaling pathway                         | 0.01411 |
| GO:0014072 | response to isoquinoline alkaloid                            | 0.01411 |
| GO:0043278 | response to morphine                                         | 0.01411 |
| GO:0060541 | respiratory system development                               | 0.01413 |
| GO:0003407 | neural retina development                                    | 0.01413 |
| GO:0046888 | negative regulation of hormone secretion                     | 0.01413 |
| GO:0015370 | solute:sodium symporter activity                             | 0.01419 |
| GO:0015171 | amino acid transmembrane transporter activity                | 0.01421 |
| GO:0009799 | specification of symmetry                                    | 0.01533 |
| GO:0009410 | response to xenobiotic stimulus                              | 0.01545 |
| GO:0072178 | nephric duct morphogenesis                                   | 0.0156  |
| GO:0050708 | regulation of protein secretion                              | 0.01638 |
| GO:1903825 | organic acid transmembrane transport                         | 0.0166  |
| GO:0007368 | determination of left/right symmetry                         | 0.0166  |
| GO:0008227 | G protein-coupled amine receptor activity                    | 0.01723 |
| GO:0070696 | transmembrane receptor protein serine/threonine kinase bin   | 0.0173  |
| GO:0002138 | retinoic acid biosynthetic process                           | 0.01745 |
| GO:0010496 | intercellular transport                                      | 0.01745 |
| GO:0071286 | cellular response to magnesium ion                           | 0.01745 |
| GO:0099026 | anchored component of presynaptic membrane                   | 0.01754 |
| GO:0035855 | megakaryocyte development                                    | 0.01755 |
| GO:0055003 | cardiac myofibril assembly                                   | 0.01755 |
| GO:0005892 | acetylcholine-gated channel complex                          | 0.01763 |
| GO:0048593 | camera-type eye morphogenesis                                | 0.01788 |
| GO:0005343 | organic acid:sodium symporter activity                       | 0.01891 |
| GO:0005328 | neurotransmitter:sodium symporter activity                   | 0.01891 |
| GO:0042043 | neurexin family protein binding                              | 0.01891 |
| GO:0033612 | receptor serine/threonine kinase binding                     | 0.01891 |
| GO:0099072 | regulation of postsynaptic membrane neurotransmitter recej   | 0.01938 |
| GO:0019911 | structural constituent of myelin sheath                      | 0.01959 |
| GO:0071242 | cellular response to ammonium ion                            | 0.01969 |
| GO:0086014 | atrial cardiac muscle cell action potential                  | 0.01984 |
| GO:0086026 | atrial cardiac muscle cell to AV node cell signaling         | 0.01984 |
| GO:0086066 | atrial cardiac muscle cell to AV node cell communication     | 0.01984 |
| GO:0097386 | glial cell projection                                        | 0.02005 |
| GO:0009855 | determination of bilateral symmetry                          | 0.02016 |
| GO:0007212 | dopamine receptor signaling pathway                          | 0.02034 |
| GO:0009187 | cyclic nucleotide metabolic process                          | 0.02034 |
| GO:0001941 | postsynaptic membrane organization                           | 0.02105 |
| GO:0030501 | positive regulation of bone mineralization                   | 0.02105 |
| GO:0033165 | interphotoreceptor matrix                                    | 0.02116 |
| GO:0044300 | cerebellar mossy fiber                                       | 0.02116 |
| GO:0014047 | glutamate secretion                                          | 0.0213  |
| GO:0086012 | membrane depolarization during cardiac muscle cell action    | 0.0213  |
| GO:0005004 | GPI-linked ephrin receptor activity                          | 0.02153 |
| GO:1903763 | gap junction channel activity involved in cell communicati   | 0.02153 |
| GO:0010765 | positive regulation of sodium ion transport                  | 0.02251 |
| GO:0016338 | calcium-independent cell-cell adhesion via plasma membra     | 0.02251 |
| GO:0060384 | innervation                                                  | 0.02251 |
| GO:0010459 | negative regulation of heart rate                            | 0.02251 |
| GO:0016188 | synaptic vesicle maturation                                  | 0.02251 |
| GO:0038003 | opioid receptor signaling pathway                            | 0.02251 |
| GO:0048791 | calcium ion-regulated exocytosis of neurotransmitter         | 0.02251 |
| GO:0071947 | protein deubiquitination involved in ubiquitin-dependent pr  | 0.02251 |
| GO:0046887 | positive regulation of hormone secretion                     | 0.02259 |
| GO:0043267 | negative regulation of potassium ion transport               | 0.02282 |
| GO:0046339 | diacylglycerol metabolic process                             | 0.02301 |
| GO:0051350 | negative regulation of lyase activity                        | 0.02301 |
| GO:0070633 | transepithelial transport                                    | 0.02327 |
| GO:0099590 | neurotransmitter receptor internalization                    | 0.02327 |
| GO:0006855 | drug transmembrane transport                                 | 0.02372 |
| GO:0003774 | motor activity                                               | 0.0238  |
| GO:0008081 | phosphoric diester hydrolase activity                        | 0.02494 |



|            |                                                              |         |
|------------|--------------------------------------------------------------|---------|
| GO:0005003 | ephrin receptor activity                                     | 0.02542 |
| GO:0005416 | amino acid:cation symporter activity                         | 0.02542 |
| GO:1990939 | ATP-dependent microtubule motor activity                     | 0.02542 |
| GO:0060996 | dendritic spine development                                  | 0.02567 |
| GO:0060986 | endocrine hormone secretion                                  | 0.02567 |
| GO:0071277 | cellular response to calcium ion                             | 0.0267  |
| GO:0030133 | transport vesicle                                            | 0.02673 |
| GO:1905039 | carboxylic acid transmembrane transport                      | 0.02783 |
| GO:0015812 | gamma-aminobutyric acid transport                            | 0.02834 |
| GO:0033605 | positive regulation of catecholamine secretion               | 0.02834 |
| GO:0072578 | neurotransmitter-gated ion channel clustering                | 0.02834 |
| GO:0090128 | regulation of synapse maturation                             | 0.02834 |
| GO:1900452 | regulation of long-term synaptic depression                  | 0.02834 |
| GO:0003777 | microtubule motor activity                                   | 0.02944 |
| GO:0071855 | neuropeptide receptor binding                                | 0.03028 |
| GO:0017075 | syntaxin-1 binding                                           | 0.03046 |
| GO:0035255 | ionotropic glutamate receptor binding                        | 0.03046 |
| GO:0006584 | catecholamine metabolic process                              | 0.03065 |
| GO:0009712 | catechol-containing compound metabolic process               | 0.03065 |
| GO:0044214 | spanning component of plasma membrane                        | 0.03089 |
| GO:0002673 | regulation of acute inflammatory response                    | 0.0312  |
| GO:0009306 | protein secretion                                            | 0.03126 |
| GO:0001540 | amyloid-beta binding                                         | 0.0318  |
| GO:0051931 | regulation of sensory perception                             | 0.0319  |
| GO:0044070 | regulation of anion transport                                | 0.03201 |
| GO:0007216 | G protein-coupled glutamate receptor signaling pathway       | 0.0327  |
| GO:0034331 | cell junction maintenance                                    | 0.0327  |
| GO:0043116 | negative regulation of vascular permeability                 | 0.0327  |
| GO:0045989 | positive regulation of striated muscle contraction           | 0.0327  |
| GO:0060572 | morphogenesis of an epithelial bud                           | 0.0327  |
| GO:0042428 | serotonin metabolic process                                  | 0.03273 |
| GO:0070782 | phosphatidylserine exposure on apoptotic cell surface        | 0.03273 |
| GO:0097119 | postsynaptic density protein 95 clustering                   | 0.03273 |
| GO:0031234 | extrinsic component of cytoplasmic side of plasma membra     | 0.03383 |
| GO:0015294 | solute:cation symporter activity                             | 0.03491 |
| GO:0005313 | L-glutamate transmembrane transporter activity               | 0.03554 |
| GO:1901338 | catecholamine binding                                        | 0.03554 |
| GO:0034587 | piRNA metabolic process                                      | 0.03584 |
| GO:0071435 | potassium ion export                                         | 0.03584 |
| GO:0097623 | potassium ion export across plasma membrane                  | 0.03584 |
| GO:0042908 | xenobiotic transport                                         | 0.03586 |
| GO:0060306 | regulation of membrane repolarization                        | 0.03586 |
| GO:0042461 | photoreceptor cell development                               | 0.03664 |
| GO:0043090 | amino acid import                                            | 0.03664 |
| GO:1905144 | response to acetylcholine                                    | 0.03697 |
| GO:1905145 | cellular response to acetylcholine                           | 0.03697 |
| GO:0007194 | negative regulation of adenylate cyclase activity            | 0.03781 |
| GO:0019098 | reproductive behavior                                        | 0.03803 |
| GO:0095500 | acetylcholine receptor signaling pathway                     | 0.03803 |
| GO:1903831 | signal transduction involved in cellular response to ammoni  | 0.03803 |
| GO:0015740 | C4-dicarboxylate transport                                   | 0.0385  |
| GO:0010676 | positive regulation of cellular carbohydrate metabolic proce | 0.0385  |
| GO:0061098 | positive regulation of protein tyrosine kinase activity      | 0.0385  |
| GO:0090280 | positive regulation of calcium ion import                    | 0.0385  |
| GO:0043279 | response to alkaloid                                         | 0.0385  |
| GO:0010460 | positive regulation of heart rate                            | 0.03855 |
| GO:0086011 | membrane repolarization during action potential              | 0.03855 |
| GO:0097205 | renal filtration                                             | 0.03855 |
| GO:0099623 | regulation of cardiac muscle cell membrane repolarization    | 0.03855 |
| GO:0099625 | ventricular cardiac muscle cell membrane repolarization      | 0.03855 |
| GO:0045822 | negative regulation of heart contraction                     | 0.03855 |
| GO:0060571 | morphogenesis of an epithelial fold                          | 0.03855 |
| GO:0007185 | transmembrane receptor protein tyrosine phosphatase signa    | 0.03855 |
| GO:0009448 | gamma-aminobutyric acid metabolic process                    | 0.03855 |
| GO:0010754 | negative regulation of cGMP-mediated signaling               | 0.03855 |
| GO:0046958 | nonassociative learning                                      | 0.03855 |
| GO:0086029 | Purkinje myocyte to ventricular cardiac muscle cell signalin | 0.03855 |
| GO:0086068 | Purkinje myocyte to ventricular cardiac muscle cell commu    | 0.03855 |
| GO:0097151 | positive regulation of inhibitory postsynaptic potential     | 0.03855 |
| GO:0098828 | modulation of inhibitory postsynaptic potential              | 0.03855 |
| GO:1990349 | gap junction-mediated intercellular transport                | 0.03855 |
| GO:0090533 | cation-transporting ATPase complex                           | 0.03896 |

|            |                                                                         |         |
|------------|-------------------------------------------------------------------------|---------|
| GO:0099516 | ion antiporter activity                                                 | 0.0399  |
| GO:0005127 | ciliary neurotrophic factor receptor binding                            | 0.04105 |
| GO:0005229 | intracellular calcium activated chloride channel activity               | 0.04117 |
| GO:0022841 | potassium ion leak channel activity                                     | 0.04117 |
| GO:0061778 | intracellular chloride channel activity                                 | 0.04117 |
| GO:0043954 | cellular component maintenance                                          | 0.04136 |
| GO:0051279 | regulation of release of sequestered calcium ion into cytosol           | 0.0419  |
| GO:0005938 | cell cortex                                                             | 0.04192 |
| GO:0009898 | cytoplasmic side of plasma membrane                                     | 0.04192 |
| GO:0030902 | hindbrain development                                                   | 0.0428  |
| GO:0044291 | cell-cell contact zone                                                  | 0.04297 |
| GO:0060287 | epithelial cilium movement involved in determination of left-right axis | 0.04412 |
| GO:0086070 | SA node cell to atrial cardiac muscle cell communication                | 0.04412 |
| GO:0099550 | trans-synaptic signaling, modulating synaptic transmission              | 0.04412 |
| GO:0099566 | regulation of postsynaptic cytosolic calcium ion concentration          | 0.04412 |
| GO:0005310 | dicarboxylic acid transmembrane transporter activity                    | 0.04436 |
| GO:0046847 | filopodium assembly                                                     | 0.04441 |
| GO:0030863 | cortical cytoskeleton                                                   | 0.04503 |
| GO:0016328 | lateral plasma membrane                                                 | 0.04503 |
| GO:0060998 | regulation of dendritic spine development                               | 0.04517 |
| GO:0051590 | positive regulation of neurotransmitter transport                       | 0.04806 |
| GO:0051930 | regulation of sensory perception of pain                                | 0.04806 |
| GO:0086091 | regulation of heart rate by cardiac conduction                          | 0.04806 |
| GO:0061333 | renal tubule morphogenesis                                              | 0.04891 |
| GO:0072028 | nephron morphogenesis                                                   | 0.04891 |
| GO:0015272 | ATP-activated inward rectifier potassium channel activity               | 0.04934 |

**GO:Medium\_Trend Only**

|            |                                                                          |         |
|------------|--------------------------------------------------------------------------|---------|
| GO:0000978 | RNA polymerase II proximal promoter sequence-specific DNA binding        | 0.00058 |
| GO:0070050 | neuron cellular homeostasis                                              | 0.00071 |
| GO:0000987 | proximal promoter sequence-specific DNA binding                          | 0.00126 |
| GO:0022010 | central nervous system myelination                                       | 0.00138 |
| GO:0032291 | axon ensheathment in central nervous system                              | 0.00138 |
| GO:0044458 | motile cilium assembly                                                   | 0.00151 |
| GO:0044782 | cilium organization                                                      | 0.00156 |
| GO:0040007 | growth                                                                   | 0.00174 |
| GO:0099509 | regulation of presynaptic cytosolic calcium ion concentration            | 0.00235 |
| GO:0035107 | appendage morphogenesis                                                  | 0.00257 |
| GO:0035108 | limb morphogenesis                                                       | 0.00257 |
| GO:0032421 | stereocilium bundle                                                      | 0.00334 |
| GO:0060271 | cilium assembly                                                          | 0.00344 |
| GO:2000969 | positive regulation of AMPA receptor activity                            | 0.00368 |
| GO:0021782 | glial cell development                                                   | 0.00401 |
| GO:0044212 | transcription regulatory region DNA binding                              | 0.00461 |
| GO:0001067 | regulatory region nucleic acid binding                                   | 0.00528 |
| GO:0000976 | transcription regulatory region sequence-specific DNA binding            | 0.0056  |
| GO:1990837 | sequence-specific double-stranded DNA binding                            | 0.00785 |
| GO:0008038 | neuron recognition                                                       | 0.00929 |
| GO:0043565 | sequence-specific DNA binding                                            | 0.01008 |
| GO:0008092 | cytoskeletal protein binding                                             | 0.01008 |
| GO:0010739 | positive regulation of protein kinase A signaling                        | 0.01033 |
| GO:0010880 | regulation of release of sequestered calcium ion into cytosol            | 0.01056 |
| GO:0048747 | muscle fiber development                                                 | 0.01122 |
| GO:0048736 | appendage development                                                    | 0.01186 |
| GO:0060173 | limb development                                                         | 0.01186 |
| GO:0030031 | cell projection assembly                                                 | 0.01191 |
| GO:0035641 | locomotory exploration behavior                                          | 0.01205 |
| GO:0099150 | regulation of postsynaptic specialization assembly                       | 0.01205 |
| GO:0150052 | regulation of postsynapse assembly                                       | 0.01205 |
| GO:0120031 | plasma membrane bounded cell projection assembly                         | 0.01264 |
| GO:0001539 | cilium or flagellum-dependent cell motility                              | 0.01275 |
| GO:0060285 | cilium-dependent cell motility                                           | 0.01275 |
| GO:1900451 | positive regulation of glutamate receptor signaling pathway              | 0.01301 |
| GO:0071625 | vocalization behavior                                                    | 0.01318 |
| GO:2000257 | regulation of protein activation cascade                                 | 0.01356 |
| GO:1903514 | release of sequestered calcium ion into cytosol by endoplasmic reticulum | 0.01423 |
| GO:0017080 | sodium channel regulator activity                                        | 0.01629 |
| GO:0014003 | oligodendrocyte development                                              | 0.01791 |
| GO:0007628 | adult walking behavior                                                   | 0.01793 |
| GO:0086064 | cell communication by electrical coupling involved in cardiac conduction | 0.01976 |
| GO:0048787 | presynaptic active zone membrane                                         | 0.02111 |
| GO:0030326 | embryonic limb morphogenesis                                             | 0.02117 |
| GO:0035113 | embryonic appendage morphogenesis                                        | 0.02117 |

|            |                                                                                                 |         |
|------------|-------------------------------------------------------------------------------------------------|---------|
| GO:0010738 | regulation of protein kinase A signaling                                                        | 0.02163 |
| GO:1905383 | protein localization to presynapse                                                              | 0.02388 |
| GO:0097440 | apical dendrite                                                                                 | 0.02464 |
| GO:0014044 | Schwann cell development                                                                        | 0.02576 |
| GO:0014808 | release of sequestered calcium ion into cytosol by sarcoplasmic reticulum calcium ion transport | 0.02576 |
| GO:0070296 | sarcoplasmic reticulum calcium ion transport                                                    | 0.02658 |
| GO:0099151 | regulation of postsynaptic density assembly                                                     | 0.02658 |
| GO:0048670 | regulation of collateral sprouting                                                              | 0.02658 |
| GO:0007519 | skeletal muscle tissue development                                                              | 0.02683 |
| GO:0060538 | skeletal muscle organ development                                                               | 0.0271  |
| GO:0021987 | cerebral cortex development                                                                     | 0.0273  |
| GO:1905874 | regulation of postsynaptic density organization                                                 | 0.02732 |
| GO:0060080 | inhibitory postsynaptic potential                                                               | 0.02742 |
| GO:0090659 | walking behavior                                                                                | 0.02816 |
| GO:0061387 | regulation of extent of cell growth                                                             | 0.0285  |
| GO:0003009 | skeletal muscle contraction                                                                     | 0.02859 |
| GO:0030517 | negative regulation of axon extension                                                           | 0.02859 |
| GO:0008228 | opsonization                                                                                    | 0.03222 |
| GO:0005954 | calcium- and calmodulin-dependent protein kinase complex                                        | 0.03401 |
| GO:0098862 | cluster of actin-based cell projections                                                         | 0.03882 |
| GO:0043501 | skeletal muscle adaptation                                                                      | 0.04007 |
| GO:0030449 | regulation of complement activation                                                             | 0.04091 |
| GO:0036064 | ciliary basal body                                                                              | 0.04412 |
| GO:0032098 | regulation of appetite                                                                          | 0.0447  |
| GO:0043034 | costamere                                                                                       | 0.04473 |
| GO:0030426 | growth cone                                                                                     | 0.04724 |
| GO:0060077 | inhibitory synapse                                                                              | 0.0483  |
| GO:0048788 | cytoskeleton of presynaptic active zone                                                         | 0.0498  |

**GelMA\_HA Trend Common**

|            |                                                     |          |
|------------|-----------------------------------------------------|----------|
| GO:0097458 | neuron part                                         | 4.46E-52 |
| GO:0042995 | cell projection                                     | 1.79E-48 |
| GO:0099537 | trans-synaptic signaling                            | 2.04E-48 |
| GO:0007268 | chemical synaptic transmission                      | 2.04E-48 |
| GO:0098916 | anterograde trans-synaptic signaling                | 2.04E-48 |
| GO:0099536 | synaptic signaling                                  | 6.79E-47 |
| GO:0120025 | plasma membrane bounded cell projection             | 1.92E-45 |
| GO:0043005 | neuron projection                                   | 1.07E-44 |
| GO:0045202 | synapse                                             | 2.48E-43 |
| GO:0044456 | synapse part                                        | 6.47E-37 |
| GO:1902495 | transmembrane transporter complex                   | 2.19E-35 |
| GO:0097060 | synaptic membrane                                   | 2.19E-35 |
| GO:0034702 | ion channel complex                                 | 1.11E-34 |
| GO:0044463 | cell projection part                                | 8.11E-33 |
| GO:0120038 | plasma membrane bounded cell projection part        | 8.11E-33 |
| GO:1990351 | transporter complex                                 | 1.80E-32 |
| GO:0022839 | ion gated channel activity                          | 1.14E-31 |
| GO:0007399 | nervous system development                          | 5.46E-31 |
| GO:0036477 | somatodendritic compartment                         | 6.24E-31 |
| GO:0050804 | modulation of chemical synaptic transmission        | 2.47E-29 |
| GO:0099177 | regulation of trans-synaptic signaling              | 3.60E-29 |
| GO:0045211 | postsynaptic membrane                               | 3.94E-29 |
| GO:0098794 | postsynapse                                         | 1.24E-26 |
| GO:0046873 | metal ion transmembrane transporter activity        | 4.68E-25 |
| GO:0034703 | cation channel complex                              | 1.26E-24 |
| GO:0097447 | dendritic tree                                      | 2.06E-24 |
| GO:0022008 | neurogenesis                                        | 4.94E-24 |
| GO:0030425 | dendrite                                            | 5.01E-24 |
| GO:0034765 | regulation of ion transmembrane transport           | 1.07E-23 |
| GO:0098655 | cation transmembrane transport                      | 3.42E-23 |
| GO:0034762 | regulation of transmembrane transport               | 5.63E-23 |
| GO:0044057 | regulation of system process                        | 2.40E-22 |
| GO:0042391 | regulation of membrane potential                    | 2.62E-22 |
| GO:0098793 | presynapse                                          | 3.92E-22 |
| GO:0006813 | potassium ion transport                             | 5.56E-22 |
| GO:0048699 | generation of neurons                               | 6.41E-22 |
| GO:0071804 | cellular potassium ion transport                    | 1.41E-20 |
| GO:0071805 | potassium ion transmembrane transport               | 1.41E-20 |
| GO:0008324 | cation transmembrane transporter activity           | 5.26E-20 |
| GO:0022890 | inorganic cation transmembrane transporter activity | 5.26E-20 |
| GO:0099240 | intrinsic component of synaptic membrane            | 1.16E-19 |
| GO:0022832 | voltage-gated channel activity                      | 1.20E-19 |
| GO:0006836 | neurotransmitter transport                          | 1.69E-19 |

|            |                                                             |          |
|------------|-------------------------------------------------------------|----------|
| GO:0043025 | neuronal cell body                                          | 2.06E-19 |
| GO:0005244 | voltage-gated ion channel activity                          | 2.18E-19 |
| GO:0030424 | axon                                                        | 3.22E-19 |
| GO:0044297 | cell body                                                   | 3.24E-19 |
| GO:0060078 | regulation of postsynaptic membrane potential               | 6.09E-19 |
| GO:0048666 | neuron development                                          | 6.81E-19 |
| GO:0007610 | behavior                                                    | 6.81E-19 |
| GO:0030182 | neuron differentiation                                      | 8.00E-19 |
| GO:0099699 | integral component of synaptic membrane                     | 8.40E-19 |
| GO:0022843 | voltage-gated cation channel activity                       | 1.10E-18 |
| GO:0003008 | system process                                              | 2.05E-18 |
| GO:0098984 | neuron to neuron synapse                                    | 5.99E-18 |
| GO:0015079 | potassium ion transmembrane transporter activity            | 8.76E-18 |
| GO:0035637 | multicellular organismal signaling                          | 2.00E-17 |
| GO:0098662 | inorganic cation transmembrane transport                    | 3.14E-17 |
| GO:0015672 | monovalent inorganic cation transport                       | 3.51E-17 |
| GO:0099572 | postsynaptic specialization                                 | 4.62E-17 |
| GO:0048812 | neuron projection morphogenesis                             | 7.02E-17 |
| GO:0099055 | integral component of postsynaptic membrane                 | 1.28E-16 |
| GO:0051960 | regulation of nervous system development                    | 1.85E-16 |
| GO:0031175 | neuron projection development                               | 3.25E-16 |
| GO:0048858 | cell projection morphogenesis                               | 4.56E-16 |
| GO:0120039 | plasma membrane bounded cell projection morphogenesis       | 5.33E-16 |
| GO:0050808 | synapse organization                                        | 5.99E-16 |
| GO:0005267 | potassium channel activity                                  | 6.87E-16 |
| GO:0099634 | postsynaptic specialization membrane                        | 7.98E-16 |
| GO:0042734 | presynaptic membrane                                        | 1.02E-15 |
| GO:0098936 | intrinsic component of postsynaptic membrane                | 1.06E-15 |
| GO:1903522 | regulation of blood circulation                             | 2.06E-15 |
| GO:0030030 | cell projection organization                                | 2.08E-15 |
| GO:0032279 | asymmetric synapse                                          | 2.85E-15 |
| GO:0098978 | glutamatergic synapse                                       | 3.33E-15 |
| GO:0120036 | plasma membrane bounded cell projection organization        | 3.71E-15 |
| GO:0032989 | cellular component morphogenesis                            | 4.41E-15 |
| GO:1904062 | regulation of cation transmembrane transport                | 5.63E-15 |
| GO:0034705 | potassium channel complex                                   | 5.66E-15 |
| GO:0014069 | postsynaptic density                                        | 7.98E-15 |
| GO:0032990 | cell part morphogenesis                                     | 1.34E-14 |
| GO:0048667 | cell morphogenesis involved in neuron differentiation       | 3.90E-14 |
| GO:0008076 | voltage-gated potassium channel complex                     | 1.51E-13 |
| GO:0001505 | regulation of neurotransmitter levels                       | 1.82E-13 |
| GO:0023061 | signal release                                              | 2.52E-13 |
| GO:0015077 | monovalent inorganic cation transmembrane transporter act   | 2.71E-13 |
| GO:2001257 | regulation of cation channel activity                       | 2.81E-13 |
| GO:0008016 | regulation of heart contraction                             | 2.84E-13 |
| GO:0005249 | voltage-gated potassium channel activity                    | 3.43E-13 |
| GO:0007218 | neuropeptide signaling pathway                              | 9.43E-13 |
| GO:0000904 | cell morphogenesis involved in differentiation              | 1.42E-12 |
| GO:0050806 | positive regulation of synaptic transmission                | 1.59E-12 |
| GO:0007193 | adenylate cyclase-inhibiting G protein-coupled receptor sig | 1.86E-12 |
| GO:0061337 | cardiac conduction                                          | 1.94E-12 |
| GO:0030594 | neurotransmitter receptor activity                          | 2.61E-12 |
| GO:0060047 | heart contraction                                           | 3.52E-12 |
| GO:0010959 | regulation of metal ion transport                           | 3.95E-12 |
| GO:0022898 | regulation of transmembrane transporter activity            | 4.11E-12 |
| GO:0007215 | glutamate receptor signaling pathway                        | 4.45E-12 |
| GO:0003015 | heart process                                               | 6.03E-12 |
| GO:0048167 | regulation of synaptic plasticity                           | 7.17E-12 |
| GO:0007417 | central nervous system development                          | 7.76E-12 |
| GO:0032412 | regulation of ion transmembrane transporter activity        | 8.52E-12 |
| GO:0008528 | G protein-coupled peptide receptor activity                 | 9.27E-12 |
| GO:0001653 | peptide receptor activity                                   | 9.38E-12 |
| GO:0050767 | regulation of neurogenesis                                  | 1.40E-11 |
| GO:0007409 | axonogenesis                                                | 1.58E-11 |
| GO:0099565 | chemical synaptic transmission, postsynaptic                | 1.95E-11 |
| GO:0001508 | action potential                                            | 2.00E-11 |
| GO:0032409 | regulation of transporter activity                          | 2.14E-11 |
| GO:0099643 | signal release from synapse                                 | 2.43E-11 |
| GO:0099060 | integral component of postsynaptic specialization membran   | 2.46E-11 |
| GO:0015837 | amine transport                                             | 2.76E-11 |
| GO:0098839 | postsynaptic density membrane                               | 2.86E-11 |
| GO:0035249 | synaptic transmission, glutamatergic                        | 3.31E-11 |

|            |                                                                    |          |
|------------|--------------------------------------------------------------------|----------|
| GO:0061564 | axon development                                                   | 3.32E-11 |
| GO:0007269 | neurotransmitter secretion                                         | 4.23E-11 |
| GO:0015276 | ligand-gated ion channel activity                                  | 4.78E-11 |
| GO:0022834 | ligand-gated channel activity                                      | 4.78E-11 |
| GO:0060079 | excitatory postsynaptic potential                                  | 5.81E-11 |
| GO:0051952 | regulation of amine transport                                      | 7.34E-11 |
| GO:0031344 | regulation of cell projection organization                         | 1.16E-10 |
| GO:0098948 | intrinsic component of postsynaptic specialization membrane        | 1.98E-10 |
| GO:0043204 | perikaryon                                                         | 2.84E-10 |
| GO:0060076 | excitatory synapse                                                 | 2.84E-10 |
| GO:0007611 | learning or memory                                                 | 3.72E-10 |
| GO:0120035 | regulation of plasma membrane bounded cell projection organization | 3.72E-10 |
| GO:0098889 | intrinsic component of presynaptic membrane                        | 4.49E-10 |
| GO:0043197 | dendritic spine                                                    | 5.04E-10 |
| GO:0032590 | dendrite membrane                                                  | 5.17E-10 |
| GO:0098960 | postsynaptic neurotransmitter receptor activity                    | 5.62E-10 |
| GO:0022824 | transmitter-gated ion channel activity                             | 5.62E-10 |
| GO:0022835 | transmitter-gated channel activity                                 | 5.62E-10 |
| GO:0051962 | positive regulation of nervous system development                  | 5.75E-10 |
| GO:1902476 | chloride transmembrane transport                                   | 6.13E-10 |
| GO:0031644 | regulation of neurological system process                          | 7.16E-10 |
| GO:0044309 | neuron spine                                                       | 7.48E-10 |
| GO:0010975 | regulation of neuron projection development                        | 8.18E-10 |
| GO:0044306 | neuron projection terminus                                         | 8.93E-10 |
| GO:1900449 | regulation of glutamate receptor signaling pathway                 | 9.64E-10 |
| GO:0006814 | sodium ion transport                                               | 9.64E-10 |
| GO:0043266 | regulation of potassium ion transport                              | 1.23E-09 |
| GO:0007416 | synapse assembly                                                   | 1.23E-09 |
| GO:0005230 | extracellular ligand-gated ion channel activity                    | 1.23E-09 |
| GO:0051588 | regulation of neurotransmitter transport                           | 1.27E-09 |
| GO:0033267 | axon part                                                          | 1.54E-09 |
| GO:0032589 | neuron projection membrane                                         | 2.01E-09 |
| GO:0045664 | regulation of neuron differentiation                               | 2.23E-09 |
| GO:0015893 | drug transport                                                     | 2.42E-09 |
| GO:0099601 | regulation of neurotransmitter receptor activity                   | 2.61E-09 |
| GO:0099529 | neurotransmitter receptor activity involved in regulation of       | 2.64E-09 |
| GO:0030672 | synaptic vesicle membrane                                          | 2.71E-09 |
| GO:0099501 | exocytic vesicle membrane                                          | 2.71E-09 |
| GO:0051966 | regulation of synaptic transmission, glutamatergic                 | 2.91E-09 |
| GO:0050954 | sensory perception of mechanical stimulus                          | 3.57E-09 |
| GO:0099504 | synaptic vesicle cycle                                             | 3.97E-09 |
| GO:0098982 | GABA-ergic synapse                                                 | 5.80E-09 |
| GO:0043679 | axon terminus                                                      | 8.81E-09 |
| GO:0044441 | ciliary part                                                       | 8.83E-09 |
| GO:0050890 | cognition                                                          | 1.33E-08 |
| GO:0015081 | sodium ion transmembrane transporter activity                      | 2.17E-08 |
| GO:1904064 | positive regulation of cation transmembrane transport              | 2.57E-08 |
| GO:0098656 | anion transmembrane transport                                      | 2.72E-08 |
| GO:1904315 | transmitter-gated ion channel activity involved in regulation of   | 2.95E-08 |
| GO:0005929 | cilium                                                             | 3.53E-08 |
| GO:0044304 | main axon                                                          | 3.98E-08 |
| GO:0050877 | nervous system process                                             | 4.07E-08 |
| GO:0050433 | regulation of catecholamine secretion                              | 4.17E-08 |
| GO:0099056 | integral component of presynaptic membrane                         | 4.40E-08 |
| GO:0098661 | inorganic anion transmembrane transport                            | 5.93E-08 |
| GO:0097479 | synaptic vesicle localization                                      | 6.22E-08 |
| GO:0097485 | neuron projection guidance                                         | 6.46E-08 |
| GO:0031646 | positive regulation of neurological system process                 | 7.13E-08 |
| GO:0017158 | regulation of calcium ion-dependent exocytosis                     | 7.13E-08 |
| GO:1901379 | regulation of potassium ion transmembrane transport                | 7.13E-08 |
| GO:0016079 | synaptic vesicle exocytosis                                        | 7.13E-08 |
| GO:0033555 | multicellular organismal response to stress                        | 7.35E-08 |
| GO:0007612 | learning                                                           | 7.51E-08 |
| GO:0050953 | sensory perception of light stimulus                               | 8.07E-08 |
| GO:0007411 | axon guidance                                                      | 9.22E-08 |
| GO:0008188 | neuropeptide receptor activity                                     | 9.51E-08 |
| GO:0015844 | monoamine transport                                                | 9.55E-08 |
| GO:0009582 | detection of abiotic stimulus                                      | 1.12E-07 |
| GO:0050803 | regulation of synapse structure or activity                        | 1.13E-07 |
| GO:0017156 | calcium ion regulated exocytosis                                   | 1.16E-07 |
| GO:0006821 | chloride transport                                                 | 1.22E-07 |
| GO:0007601 | visual perception                                                  | 1.31E-07 |

|            |                                                              |          |
|------------|--------------------------------------------------------------|----------|
| GO:0034767 | positive regulation of ion transmembrane transport           | 1.40E-07 |
| GO:0150034 | distal axon                                                  | 1.41E-07 |
| GO:0007605 | sensory perception of sound                                  | 1.57E-07 |
| GO:0034764 | positive regulation of transmembrane transport               | 1.77E-07 |
| GO:0009581 | detection of external stimulus                               | 1.91E-07 |
| GO:0046928 | regulation of neurotransmitter secretion                     | 2.11E-07 |
| GO:0008509 | anion transmembrane transporter activity                     | 2.29E-07 |
| GO:0006941 | striated muscle contraction                                  | 2.29E-07 |
| GO:0050432 | catecholamine secretion                                      | 2.32E-07 |
| GO:0030534 | adult behavior                                               | 2.43E-07 |
| GO:0051937 | catecholamine transport                                      | 2.53E-07 |
| GO:0051965 | positive regulation of synapse assembly                      | 2.66E-07 |
| GO:0031253 | cell projection membrane                                     | 2.68E-07 |
| GO:0070382 | exocytic vesicle                                             | 2.75E-07 |
| GO:0009914 | hormone transport                                            | 2.80E-07 |
| GO:2000463 | positive regulation of excitatory postsynaptic potential     | 4.70E-07 |
| GO:0035725 | sodium ion transmembrane transport                           | 6.14E-07 |
| GO:0098878 | neurotransmitter receptor complex                            | 6.57E-07 |
| GO:0051963 | regulation of synapse assembly                               | 6.57E-07 |
| GO:0046879 | hormone secretion                                            | 6.64E-07 |
| GO:0099003 | vesicle-mediated transport in synapse                        | 7.54E-07 |
| GO:0097014 | ciliary plasm                                                | 8.03E-07 |
| GO:0005930 | axoneme                                                      | 8.33E-07 |
| GO:0015698 | inorganic anion transport                                    | 8.99E-07 |
| GO:0031225 | anchored component of membrane                               | 9.26E-07 |
| GO:0099095 | ligand-gated anion channel activity                          | 9.40E-07 |
| GO:1902710 | GABA receptor complex                                        | 1.02E-06 |
| GO:0050807 | regulation of synapse organization                           | 1.10E-06 |
| GO:0008021 | synaptic vesicle                                             | 1.16E-06 |
| GO:0015108 | chloride transmembrane transporter activity                  | 1.28E-06 |
| GO:0007613 | memory                                                       | 1.49E-06 |
| GO:0070588 | calcium ion transmembrane transport                          | 1.57E-06 |
| GO:0098815 | modulation of excitatory postsynaptic potential              | 1.58E-06 |
| GO:0008328 | ionotropic glutamate receptor complex                        | 1.83E-06 |
| GO:0016323 | basolateral plasma membrane                                  | 1.83E-06 |
| GO:0046883 | regulation of hormone secretion                              | 2.22E-06 |
| GO:0005516 | calmodulin binding                                           | 2.29E-06 |
| GO:0099061 | integral component of postsynaptic density membrane          | 2.42E-06 |
| GO:1902711 | GABA-A receptor complex                                      | 2.49E-06 |
| GO:0044298 | cell body membrane                                           | 2.68E-06 |
| GO:0015872 | dopamine transport                                           | 2.79E-06 |
| GO:0048489 | synaptic vesicle transport                                   | 2.85E-06 |
| GO:0097480 | establishment of synaptic vesicle localization               | 2.85E-06 |
| GO:0015103 | inorganic anion transmembrane transporter activity           | 2.96E-06 |
| GO:0019226 | transmission of nerve impulse                                | 3.11E-06 |
| GO:0043268 | positive regulation of potassium ion transport               | 3.11E-06 |
| GO:0099094 | ligand-gated cation channel activity                         | 3.32E-06 |
| GO:0060291 | long-term synaptic potentiation                              | 3.54E-06 |
| GO:0031674 | I band                                                       | 3.54E-06 |
| GO:0005253 | anion channel activity                                       | 3.71E-06 |
| GO:0032809 | neuronal cell body membrane                                  | 3.81E-06 |
| GO:0098693 | regulation of synaptic vesicle cycle                         | 4.77E-06 |
| GO:0019228 | neuronal action potential                                    | 4.84E-06 |
| GO:0050769 | positive regulation of neurogenesis                          | 4.89E-06 |
| GO:1901381 | positive regulation of potassium ion transmembrane transport | 4.92E-06 |
| GO:0035418 | protein localization to synapse                              | 5.45E-06 |
| GO:0005254 | chloride channel activity                                    | 5.87E-06 |
| GO:0016324 | apical plasma membrane                                       | 5.95E-06 |
| GO:0050805 | negative regulation of synaptic transmission                 | 5.99E-06 |
| GO:1903779 | regulation of cardiac conduction                             | 5.99E-06 |
| GO:0044447 | axoneme part                                                 | 8.06E-06 |
| GO:0042383 | sarcolemma                                                   | 8.06E-06 |
| GO:0034707 | chloride channel complex                                     | 8.90E-06 |
| GO:0007420 | brain development                                            | 9.75E-06 |
| GO:0007626 | locomotory behavior                                          | 9.80E-06 |
| GO:0004890 | GABA-A receptor activity                                     | 1.00E-05 |
| GO:0016917 | GABA receptor activity                                       | 1.02E-05 |
| GO:0007214 | gamma-aminobutyric acid signaling pathway                    | 1.04E-05 |
| GO:2000311 | regulation of AMPA receptor activity                         | 1.04E-05 |
| GO:2000300 | regulation of synaptic vesicle exocytosis                    | 1.11E-05 |
| GO:2000310 | regulation of NMDA receptor activity                         | 1.11E-05 |
| GO:1902803 | regulation of synaptic vesicle transport                     | 1.11E-05 |

|            |                                                                 |          |
|------------|-----------------------------------------------------------------|----------|
| GO:0099146 | intrinsic component of postsynaptic density membrane            | 1.12E-05 |
| GO:0050982 | detection of mechanical stimulus                                | 1.32E-05 |
| GO:0005891 | voltage-gated calcium channel complex                           | 1.38E-05 |
| GO:0050974 | detection of mechanical stimulus involved in sensory perception | 1.43E-05 |
| GO:0005237 | inhibitory extracellular ligand-gated ion channel activity      | 1.58E-05 |
| GO:0006937 | regulation of muscle contraction                                | 1.86E-05 |
| GO:0060292 | long-term synaptic depression                                   | 2.27E-05 |
| GO:0042063 | gliogenesis                                                     | 2.37E-05 |
| GO:1903305 | regulation of regulated secretory pathway                       | 2.46E-05 |
| GO:0022604 | regulation of cell morphogenesis                                | 3.01E-05 |
| GO:0001764 | neuron migration                                                | 3.24E-05 |
| GO:0045666 | positive regulation of neuron differentiation                   | 3.29E-05 |
| GO:0048640 | negative regulation of developmental growth                     | 3.31E-05 |
| GO:0043194 | axon initial segment                                            | 3.77E-05 |
| GO:0070252 | actin-mediated cell contraction                                 | 3.86E-05 |
| GO:0048786 | presynaptic active zone                                         | 3.95E-05 |
| GO:0015085 | calcium ion transmembrane transporter activity                  | 4.26E-05 |
| GO:0051932 | synaptic transmission, GABAergic                                | 4.43E-05 |
| GO:0060322 | head development                                                | 4.75E-05 |
| GO:0099054 | presynapse assembly                                             | 4.75E-05 |
| GO:0007389 | pattern specification process                                   | 4.81E-05 |
| GO:0097730 | non-motile cilium                                               | 5.00E-05 |
| GO:0034706 | sodium channel complex                                          | 6.14E-05 |
| GO:0042596 | fear response                                                   | 6.29E-05 |
| GO:0010720 | positive regulation of cell development                         | 6.34E-05 |
| GO:0099568 | cytoplasmic region                                              | 6.39E-05 |
| GO:0030072 | peptide hormone secretion                                       | 7.17E-05 |
| GO:0099560 | synaptic membrane adhesion                                      | 7.57E-05 |
| GO:0060048 | cardiac muscle contraction                                      | 8.15E-05 |
| GO:0003341 | cilium movement                                                 | 9.05E-05 |
| GO:0016247 | channel regulator activity                                      | 9.25E-05 |
| GO:0099172 | presynapse organization                                         | 9.77E-05 |
| GO:0030048 | actin filament-based movement                                   | 0.00011  |
| GO:0022851 | GABA-gated chloride ion channel activity                        | 0.00011  |
| GO:0008066 | glutamate receptor activity                                     | 0.00011  |
| GO:1903169 | regulation of calcium ion transmembrane transport               | 0.00011  |
| GO:0030018 | Z disc                                                          | 0.00013  |
| GO:0030315 | T-tubule                                                        | 0.00013  |
| GO:0030017 | sarcomere                                                       | 0.00014  |
| GO:0005262 | calcium channel activity                                        | 0.00015  |
| GO:0051924 | regulation of calcium ion transport                             | 0.00016  |
| GO:0043292 | contractile fiber                                               | 0.00016  |
| GO:0048638 | regulation of developmental growth                              | 0.00017  |
| GO:0086001 | cardiac muscle cell action potential                            | 0.00017  |
| GO:0017157 | regulation of exocytosis                                        | 0.00017  |
| GO:0044449 | contractile fiber part                                          | 0.00018  |
| GO:0001504 | neurotransmitter uptake                                         | 0.00018  |
| GO:0086010 | membrane depolarization during action potential                 | 0.00018  |
| GO:0001518 | voltage-gated sodium channel complex                            | 0.00019  |
| GO:0001662 | behavioral fear response                                        | 0.00021  |
| GO:0048839 | inner ear development                                           | 0.00022  |
| GO:0006835 | dicarboxylic acid transport                                     | 0.00022  |
| GO:0030016 | myofibril                                                       | 0.00022  |
| GO:0002027 | regulation of heart rate                                        | 0.00023  |
| GO:0005245 | voltage-gated calcium channel activity                          | 0.00023  |
| GO:0090276 | regulation of peptide hormone secretion                         | 0.00027  |
| GO:0005858 | axonemal dynein complex                                         | 0.00028  |
| GO:0090596 | sensory organ morphogenesis                                     | 0.00031  |
| GO:0086002 | cardiac muscle cell action potential involved in contraction    | 0.00032  |
| GO:0015800 | acidic amino acid transport                                     | 0.00033  |
| GO:0016358 | dendrite development                                            | 0.00035  |
| GO:0098685 | Schaffer collateral - CA1 synapse                               | 0.00037  |
| GO:0005231 | excitatory extracellular ligand-gated ion channel activity      | 0.00037  |
| GO:0042562 | hormone binding                                                 | 0.00038  |
| GO:0032414 | positive regulation of ion transmembrane transporter activity   | 0.00038  |
| GO:0031045 | dense core granule                                              | 0.00041  |
| GO:0032838 | plasma membrane bounded cell projection cytoplasm               | 0.00041  |
| GO:0002209 | behavioral defense response                                     | 0.00045  |
| GO:1903524 | positive regulation of blood circulation                        | 0.00045  |
| GO:2001259 | positive regulation of cation channel activity                  | 0.00045  |
| GO:0090257 | regulation of muscle system process                             | 0.00046  |
| GO:0010469 | regulation of signaling receptor activity                       | 0.00046  |

|            |                                                                       |         |
|------------|-----------------------------------------------------------------------|---------|
| GO:0010001 | glial cell differentiation                                            | 0.00046 |
| GO:0019233 | sensory perception of pain                                            | 0.00046 |
| GO:0017046 | peptide hormone binding                                               | 0.00046 |
| GO:0021885 | forebrain cell migration                                              | 0.0005  |
| GO:0098739 | import across plasma membrane                                         | 0.0005  |
| GO:0031346 | positive regulation of cell projection organization                   | 0.00051 |
| GO:0051961 | negative regulation of nervous system development                     | 0.00057 |
| GO:0043583 | ear development                                                       | 0.00059 |
| GO:0010752 | regulation of cGMP-mediated signaling                                 | 0.0006  |
| GO:0019934 | cGMP-mediated signaling                                               | 0.00062 |
| GO:0050770 | regulation of axonogenesis                                            | 0.00069 |
| GO:0099174 | regulation of presynapse organization                                 | 0.0007  |
| GO:1905606 | regulation of presynapse assembly                                     | 0.0007  |
| GO:0004181 | metallocarboxypeptidase activity                                      | 0.00072 |
| GO:0005272 | sodium channel activity                                               | 0.00074 |
| GO:0086003 | cardiac muscle cell contraction                                       | 0.00079 |
| GO:0042472 | inner ear morphogenesis                                               | 0.00081 |
| GO:0032411 | positive regulation of transporter activity                           | 0.00085 |
| GO:0022029 | telencephalon cell migration                                          | 0.00085 |
| GO:0008277 | regulation of G protein-coupled receptor signaling pathway            | 0.00088 |
| GO:0035082 | axoneme assembly                                                      | 0.00089 |
| GO:0030239 | myofibril assembly                                                    | 0.00089 |
| GO:0045823 | positive regulation of heart contraction                              | 0.00091 |
| GO:0030073 | insulin secretion                                                     | 0.00092 |
| GO:0099106 | ion channel regulator activity                                        | 0.00095 |
| GO:0043949 | regulation of cAMP-mediated signaling                                 | 0.00096 |
| GO:0098659 | inorganic cation import across plasma membrane                        | 0.00096 |
| GO:0099587 | inorganic ion import across plasma membrane                           | 0.00096 |
| GO:0010721 | negative regulation of cell development                               | 0.00097 |
| GO:0046658 | anchored component of plasma membrane                                 | 0.001   |
| GO:0030658 | transport vesicle membrane                                            | 0.00101 |
| GO:0010769 | regulation of cell morphogenesis involved in differentiation          | 0.00104 |
| GO:0001750 | photoreceptor outer segment                                           | 0.0011  |
| GO:0050910 | detection of mechanical stimulus involved in sensory perception       | 0.0011  |
| GO:0030285 | integral component of synaptic vesicle membrane                       | 0.00116 |
| GO:0098686 | hippocampal mossy fiber to CA3 synapse                                | 0.00116 |
| GO:0010771 | negative regulation of cell morphogenesis involved in differentiation | 0.00119 |
| GO:0042923 | neuropeptide binding                                                  | 0.0012  |
| GO:0051899 | membrane depolarization                                               | 0.00121 |
| GO:0051968 | positive regulation of synaptic transmission, glutamatergic           | 0.00129 |
| GO:0097106 | postsynaptic density organization                                     | 0.00139 |
| GO:1901016 | regulation of potassium ion transmembrane transporter activity        | 0.00139 |
| GO:0005540 | hyaluronic acid binding                                               | 0.00144 |
| GO:0050905 | neuromuscular process                                                 | 0.00145 |
| GO:0099084 | postsynaptic specialization organization                              | 0.00147 |
| GO:0010976 | positive regulation of neuron projection development                  | 0.00155 |
| GO:0050773 | regulation of dendrite development                                    | 0.00174 |
| GO:0002028 | regulation of sodium ion transport                                    | 0.00176 |
| GO:0005248 | voltage-gated sodium channel activity                                 | 0.00194 |
| GO:0034704 | calcium channel complex                                               | 0.00198 |
| GO:0051705 | multi-organism behavior                                               | 0.00208 |
| GO:0099528 | G protein-coupled neurotransmitter receptor activity                  | 0.00208 |
| GO:0003700 | DNA-binding transcription factor activity                             | 0.00208 |
| GO:0050796 | regulation of insulin secretion                                       | 0.0022  |
| GO:0033017 | sarcoplasmic reticulum membrane                                       | 0.00225 |
| GO:0060560 | developmental growth involved in morphogenesis                        | 0.00226 |
| GO:0097120 | receptor localization to synapse                                      | 0.00244 |
| GO:0070509 | calcium ion import                                                    | 0.0025  |
| GO:0031345 | negative regulation of cell projection organization                   | 0.00253 |
| GO:0099173 | postsynapse organization                                              | 0.0026  |
| GO:0021795 | cerebral cortex cell migration                                        | 0.00273 |
| GO:0050771 | negative regulation of axonogenesis                                   | 0.0028  |
| GO:0007422 | peripheral nervous system development                                 | 0.00301 |
| GO:0050768 | negative regulation of neurogenesis                                   | 0.00301 |
| GO:0007631 | feeding behavior                                                      | 0.00334 |
| GO:1902475 | L-alpha-amino acid transmembrane transport                            | 0.00338 |
| GO:0007158 | neuron cell-cell adhesion                                             | 0.00345 |
| GO:0060402 | calcium ion transport into cytosol                                    | 0.00348 |
| GO:0045956 | positive regulation of calcium ion-dependent exocytosis               | 0.00366 |
| GO:0098563 | intrinsic component of synaptic vesicle membrane                      | 0.00368 |
| GO:0086065 | cell communication involved in cardiac conduction                     | 0.0037  |
| GO:0042165 | neurotransmitter binding                                              | 0.00381 |



|            |                                                               |         |
|------------|---------------------------------------------------------------|---------|
| GO:0008307 | structural constituent of muscle                              | 0.00381 |
| GO:0043198 | dendritic shaft                                               | 0.00406 |
| GO:0098858 | actin-based cell projection                                   | 0.00433 |
| GO:0016082 | synaptic vesicle priming                                      | 0.00453 |
| GO:1990573 | potassium ion import across plasma membrane                   | 0.00472 |
| GO:0008344 | adult locomotory behavior                                     | 0.00513 |
| GO:1904427 | positive regulation of calcium ion transmembrane transport    | 0.0055  |
| GO:0048588 | developmental cell growth                                     | 0.00556 |
| GO:0001917 | photoreceptor inner segment                                   | 0.00586 |
| GO:1905114 | cell surface receptor signaling pathway involved in cell-cell | 0.00587 |
| GO:0055001 | muscle cell development                                       | 0.00632 |
| GO:0031280 | negative regulation of cyclase activity                       | 0.00632 |
| GO:0098698 | postsynaptic specialization assembly                          | 0.00632 |
| GO:0000981 | DNA-binding transcription factor activity, RNA polymerase     | 0.00643 |
| GO:0032281 | AMPA glutamate receptor complex                               | 0.00661 |
| GO:0060401 | cytosolic calcium ion transport                               | 0.00667 |
| GO:0035176 | social behavior                                               | 0.00689 |
| GO:0051703 | intraspecies interaction between organisms                    | 0.00689 |
| GO:1901019 | regulation of calcium ion transmembrane transporter activit   | 0.00707 |
| GO:0033268 | node of Ranvier                                               | 0.00713 |
| GO:0086009 | membrane repolarization                                       | 0.0076  |
| GO:0045745 | positive regulation of G protein-coupled receptor signaling   | 0.00808 |
| GO:0042471 | ear morphogenesis                                             | 0.0081  |
| GO:0010644 | cell communication by electrical coupling                     | 0.00821 |
| GO:0004983 | neuropeptide Y receptor activity                              | 0.00915 |
| GO:0008503 | benzodiazepine receptor activity                              | 0.00915 |
| GO:0097553 | calcium ion transmembrane import into cytosol                 | 0.00975 |
| GO:0097107 | postsynaptic density assembly                                 | 0.01079 |
| GO:0044325 | ion channel binding                                           | 0.01089 |
| GO:0098814 | spontaneous synaptic transmission                             | 0.01127 |
| GO:0014704 | intercalated disc                                             | 0.01188 |
| GO:0042692 | muscle cell differentiation                                   | 0.01224 |
| GO:0021953 | central nervous system neuron differentiation                 | 0.01316 |
| GO:0001578 | microtubule bundle formation                                  | 0.01339 |
| GO:0016529 | sarcoplasmic reticulum                                        | 0.01462 |
| GO:0016528 | sarcoplasm                                                    | 0.01462 |
| GO:0010977 | negative regulation of neuron projection development          | 0.01543 |
| GO:0055002 | striated muscle cell development                              | 0.01543 |
| GO:0061669 | spontaneous neurotransmitter secretion                        | 0.01745 |
| GO:0099569 | presynaptic cytoskeleton                                      | 0.01754 |
| GO:0048589 | developmental growth                                          | 0.01779 |
| GO:0031594 | neuromuscular junction                                        | 0.0184  |
| GO:0060170 | ciliary membrane                                              | 0.01861 |
| GO:0007272 | ensheathment of neurons                                       | 0.0187  |
| GO:0008366 | axon ensheathment                                             | 0.0187  |
| GO:1901606 | alpha-amino acid catabolic process                            | 0.01938 |
| GO:0042552 | myelination                                                   | 0.02016 |
| GO:0048709 | oligodendrocyte differentiation                               | 0.02047 |
| GO:0050879 | multicellular organismal movement                             | 0.02051 |
| GO:0050881 | musculoskeletal movement                                      | 0.02051 |
| GO:0007618 | mating                                                        | 0.02105 |
| GO:0022848 | acetylcholine-gated cation-selective channel activity         | 0.02269 |
| GO:0032228 | regulation of synaptic transmission, GABAergic                | 0.02282 |
| GO:0022011 | myelination in peripheral nervous system                      | 0.02327 |
| GO:0032292 | peripheral nervous system axon ensheathment                   | 0.02327 |
| GO:0051146 | striated muscle cell differentiation                          | 0.02388 |
| GO:0004970 | ionotropic glutamate receptor activity                        | 0.02542 |
| GO:0010522 | regulation of calcium ion transport into cytosol              | 0.02567 |
| GO:0007528 | neuromuscular junction development                            | 0.02567 |
| GO:0006942 | regulation of striated muscle contraction                     | 0.02753 |
| GO:0000977 | RNA polymerase II regulatory region sequence-specific DN      | 0.03046 |
| GO:0001012 | RNA polymerase II regulatory region DNA binding               | 0.03046 |
| GO:0072562 | blood microparticle                                           | 0.03186 |
| GO:0045214 | sarcomere organization                                        | 0.0319  |
| GO:0099175 | regulation of postsynapse organization                        | 0.03263 |
| GO:0031630 | regulation of synaptic vesicle fusion to presynaptic active z | 0.03273 |
| GO:0007018 | microtubule-based movement                                    | 0.03333 |
| GO:0060997 | dendritic spine morphogenesis                                 | 0.03401 |
| GO:0043195 | terminal bouton                                               | 0.03404 |
| GO:0048639 | positive regulation of developmental growth                   | 0.03616 |
| GO:0045665 | negative regulation of neuron differentiation                 | 0.03664 |
| GO:0099068 | postsynapse assembly                                          | 0.03697 |

|            |                                                       |         |
|------------|-------------------------------------------------------|---------|
| GO:0048813 | dendrite morphogenesis                                | 0.03832 |
| GO:0055117 | regulation of cardiac muscle contraction              | 0.03844 |
| GO:0043950 | positive regulation of cAMP-mediated signaling        | 0.0385  |
| GO:0035235 | ionotropic glutamate receptor signaling pathway       | 0.03855 |
| GO:0009063 | cellular amino acid catabolic process                 | 0.0419  |
| GO:1990138 | neuron projection extension                           | 0.04564 |
| GO:0010927 | cellular component assembly involved in morphogenesis | 0.04897 |

**Medium\_Trend Common**

|            |                                                       |          |
|------------|-------------------------------------------------------|----------|
| GO:0097458 | neuron part                                           | 1.02E-45 |
| GO:0099537 | trans-synaptic signaling                              | 1.57E-37 |
| GO:0007268 | chemical synaptic transmission                        | 1.57E-37 |
| GO:0098916 | anterograde trans-synaptic signaling                  | 1.57E-37 |
| GO:0099536 | synaptic signaling                                    | 3.17E-37 |
| GO:0043005 | neuron projection                                     | 1.90E-36 |
| GO:0045202 | synapse                                               | 1.90E-36 |
| GO:0042995 | cell projection                                       | 8.27E-35 |
| GO:0044456 | synapse part                                          | 9.38E-34 |
| GO:0120025 | plasma membrane bounded cell projection               | 9.38E-34 |
| GO:0097060 | synaptic membrane                                     | 1.48E-32 |
| GO:1902495 | transmembrane transporter complex                     | 7.78E-29 |
| GO:1990351 | transporter complex                                   | 2.21E-28 |
| GO:0098794 | postsynapse                                           | 2.26E-27 |
| GO:0034702 | ion channel complex                                   | 2.89E-27 |
| GO:0007399 | nervous system development                            | 9.98E-27 |
| GO:0045211 | postsynaptic membrane                                 | 1.31E-26 |
| GO:0036477 | somatodendritic compartment                           | 3.02E-24 |
| GO:0050804 | modulation of chemical synaptic transmission          | 3.30E-23 |
| GO:0099177 | regulation of trans-synaptic signaling                | 4.46E-23 |
| GO:0042391 | regulation of membrane potential                      | 5.04E-23 |
| GO:0044463 | cell projection part                                  | 5.93E-23 |
| GO:0120038 | plasma membrane bounded cell projection part          | 5.93E-23 |
| GO:0034703 | cation channel complex                                | 2.24E-20 |
| GO:0044297 | cell body                                             | 4.58E-20 |
| GO:0022839 | ion gated channel activity                            | 5.42E-20 |
| GO:0060078 | regulation of postsynaptic membrane potential         | 1.69E-19 |
| GO:0048666 | neuron development                                    | 1.83E-19 |
| GO:0022008 | neurogenesis                                          | 2.34E-19 |
| GO:0099240 | intrinsic component of synaptic membrane              | 8.21E-19 |
| GO:0043025 | neuronal cell body                                    | 1.24E-18 |
| GO:0098984 | neuron to neuron synapse                              | 3.07E-18 |
| GO:0098793 | presynapse                                            | 3.09E-18 |
| GO:0048699 | generation of neurons                                 | 3.99E-18 |
| GO:0099634 | postsynaptic specialization membrane                  | 4.50E-18 |
| GO:0034765 | regulation of ion transmembrane transport             | 7.42E-18 |
| GO:0030182 | neuron differentiation                                | 7.55E-18 |
| GO:0099572 | postsynaptic specialization                           | 1.36E-17 |
| GO:0099699 | integral component of synaptic membrane               | 1.81E-17 |
| GO:0098655 | cation transmembrane transport                        | 2.05E-17 |
| GO:0030030 | cell projection organization                          | 2.07E-17 |
| GO:0030424 | axon                                                  | 4.16E-17 |
| GO:0097447 | dendritic tree                                        | 8.40E-17 |
| GO:0030425 | dendrite                                              | 1.96E-16 |
| GO:0120036 | plasma membrane bounded cell projection organization  | 2.34E-16 |
| GO:0044057 | regulation of system process                          | 2.35E-16 |
| GO:0098978 | glutamatergic synapse                                 | 2.54E-16 |
| GO:0032279 | asymmetric synapse                                    | 3.13E-16 |
| GO:0014069 | postsynaptic density                                  | 4.88E-16 |
| GO:0098936 | intrinsic component of postsynaptic membrane          | 5.00E-16 |
| GO:0099055 | integral component of postsynaptic membrane           | 2.36E-15 |
| GO:0031175 | neuron projection development                         | 4.82E-15 |
| GO:0007610 | behavior                                              | 5.77E-15 |
| GO:0034762 | regulation of transmembrane transport                 | 5.77E-15 |
| GO:0006836 | neurotransmitter transport                            | 5.77E-15 |
| GO:0048812 | neuron projection morphogenesis                       | 8.13E-15 |
| GO:0048858 | cell projection morphogenesis                         | 1.39E-14 |
| GO:0050808 | synapse organization                                  | 2.52E-14 |
| GO:0035637 | multicellular organismal signaling                    | 2.55E-14 |
| GO:0120039 | plasma membrane bounded cell projection morphogenesis | 3.33E-14 |
| GO:1904062 | regulation of cation transmembrane transport          | 4.15E-14 |
| GO:0098839 | postsynaptic density membrane                         | 5.47E-14 |
| GO:0042734 | presynaptic membrane                                  | 6.94E-14 |
| GO:0048667 | cell morphogenesis involved in neuron differentiation | 1.02E-13 |

|            |                                                                  |          |
|------------|------------------------------------------------------------------|----------|
| GO:0032990 | cell part morphogenesis                                          | 1.08E-13 |
| GO:0099565 | chemical synaptic transmission, postsynaptic                     | 1.37E-13 |
| GO:0099060 | integral component of postsynaptic specialization membran        | 1.46E-13 |
| GO:0098948 | intrinsic component of postsynaptic specialization membran       | 1.81E-13 |
| GO:0046873 | metal ion transmembrane transporter activity                     | 7.21E-13 |
| GO:0030594 | neurotransmitter receptor activity                               | 1.30E-12 |
| GO:2001257 | regulation of cation channel activity                            | 1.92E-12 |
| GO:0098662 | inorganic cation transmembrane transport                         | 2.04E-12 |
| GO:0022898 | regulation of transmembrane transporter activity                 | 2.91E-12 |
| GO:0060079 | excitatory postsynaptic potential                                | 3.12E-12 |
| GO:0032412 | regulation of ion transmembrane transporter activity             | 4.19E-12 |
| GO:0032409 | regulation of transporter activity                               | 9.58E-12 |
| GO:0006813 | potassium ion transport                                          | 1.21E-11 |
| GO:1903522 | regulation of blood circulation                                  | 1.22E-11 |
| GO:0008016 | regulation of heart contraction                                  | 1.23E-11 |
| GO:1900449 | regulation of glutamate receptor signaling pathway               | 2.29E-11 |
| GO:0015276 | ligand-gated ion channel activity                                | 4.24E-11 |
| GO:0022834 | ligand-gated channel activity                                    | 4.24E-11 |
| GO:0031644 | regulation of neurological system process                        | 5.25E-11 |
| GO:0043204 | perikaryon                                                       | 5.27E-11 |
| GO:0034705 | potassium channel complex                                        | 5.63E-11 |
| GO:0007269 | neurotransmitter secretion                                       | 6.10E-11 |
| GO:0033267 | axon part                                                        | 6.61E-11 |
| GO:0005230 | extracellular ligand-gated ion channel activity                  | 1.01E-10 |
| GO:0099643 | signal release from synapse                                      | 1.02E-10 |
| GO:0051960 | regulation of nervous system development                         | 1.03E-10 |
| GO:0022824 | transmitter-gated ion channel activity                           | 1.14E-10 |
| GO:0022835 | transmitter-gated channel activity                               | 1.14E-10 |
| GO:0022890 | inorganic cation transmembrane transporter activity              | 1.27E-10 |
| GO:0032989 | cellular component morphogenesis                                 | 1.51E-10 |
| GO:0051588 | regulation of neurotransmitter transport                         | 1.73E-10 |
| GO:0001505 | regulation of neurotransmitter levels                            | 1.74E-10 |
| GO:0071804 | cellular potassium ion transport                                 | 1.74E-10 |
| GO:0071805 | potassium ion transmembrane transport                            | 1.74E-10 |
| GO:0007215 | glutamate receptor signaling pathway                             | 1.78E-10 |
| GO:0099529 | neurotransmitter receptor activity involved in regulation of     | 2.13E-10 |
| GO:0098960 | postsynaptic neurotransmitter receptor activity                  | 2.70E-10 |
| GO:0008324 | cation transmembrane transporter activity                        | 3.00E-10 |
| GO:0050806 | positive regulation of synaptic transmission                     | 4.66E-10 |
| GO:0008076 | voltage-gated potassium channel complex                          | 6.12E-10 |
| GO:0060047 | heart contraction                                                | 6.28E-10 |
| GO:0099601 | regulation of neurotransmitter receptor activity                 | 7.41E-10 |
| GO:0007416 | synapse assembly                                                 | 1.13E-09 |
| GO:0005244 | voltage-gated ion channel activity                               | 1.20E-09 |
| GO:0098889 | intrinsic component of presynaptic membrane                      | 1.67E-09 |
| GO:0022832 | voltage-gated channel activity                                   | 1.74E-09 |
| GO:0098982 | GABA-ergic synapse                                               | 1.80E-09 |
| GO:0023061 | signal release                                                   | 2.13E-09 |
| GO:0061337 | cardiac conduction                                               | 2.53E-09 |
| GO:0007218 | neuropeptide signaling pathway                                   | 2.75E-09 |
| GO:0061564 | axon development                                                 | 2.78E-09 |
| GO:0015672 | monovalent inorganic cation transport                            | 2.88E-09 |
| GO:1904315 | transmitter-gated ion channel activity involved in regulation of | 2.98E-09 |
| GO:0003015 | heart process                                                    | 3.11E-09 |
| GO:0007409 | axonogenesis                                                     | 5.81E-09 |
| GO:0099061 | integral component of postsynaptic density membrane              | 7.03E-09 |
| GO:0098878 | neurotransmitter receptor complex                                | 7.53E-09 |
| GO:0099146 | intrinsic component of postsynaptic density membrane             | 7.91E-09 |
| GO:0048167 | regulation of synaptic plasticity                                | 1.08E-08 |
| GO:0001508 | action potential                                                 | 1.08E-08 |
| GO:0005929 | cilium                                                           | 1.27E-08 |
| GO:0003008 | system process                                                   | 1.45E-08 |
| GO:0000904 | cell morphogenesis involved in differentiation                   | 1.58E-08 |
| GO:0031646 | positive regulation of neurological system process               | 1.64E-08 |
| GO:0099056 | integral component of presynaptic membrane                       | 1.75E-08 |
| GO:0010959 | regulation of metal ion transport                                | 1.99E-08 |
| GO:0015079 | potassium ion transmembrane transporter activity                 | 2.01E-08 |
| GO:0043197 | dendritic spine                                                  | 2.19E-08 |
| GO:0044306 | neuron projection terminus                                       | 2.52E-08 |
| GO:0044309 | neuron spine                                                     | 2.64E-08 |
| GO:0031344 | regulation of cell projection organization                       | 2.92E-08 |
| GO:0008328 | ionotropic glutamate receptor complex                            | 3.23E-08 |

|            |                                                             |          |
|------------|-------------------------------------------------------------|----------|
| GO:0010975 | regulation of neuron projection development                 | 3.44E-08 |
| GO:0022843 | voltage-gated cation channel activity                       | 3.85E-08 |
| GO:0016079 | synaptic vesicle exocytosis                                 | 4.11E-08 |
| GO:0030534 | adult behavior                                              | 4.20E-08 |
| GO:0050767 | regulation of neurogenesis                                  | 4.96E-08 |
| GO:0044304 | main axon                                                   | 7.52E-08 |
| GO:0046928 | regulation of neurotransmitter secretion                    | 8.00E-08 |
| GO:0044441 | ciliary part                                                | 8.83E-08 |
| GO:1902803 | regulation of synaptic vesicle transport                    | 1.03E-07 |
| GO:0098685 | Schaffer collateral - CA1 synapse                           | 1.46E-07 |
| GO:0120035 | regulation of plasma membrane bounded cell projection org   | 1.70E-07 |
| GO:0099504 | synaptic vesicle cycle                                      | 1.78E-07 |
| GO:0150034 | distal axon                                                 | 2.27E-07 |
| GO:0098815 | modulation of excitatory postsynaptic potential             | 2.99E-07 |
| GO:0005267 | potassium channel activity                                  | 3.69E-07 |
| GO:0007611 | learning or memory                                          | 4.01E-07 |
| GO:0097479 | synaptic vesicle localization                               | 4.24E-07 |
| GO:0099003 | vesicle-mediated transport in synapse                       | 5.22E-07 |
| GO:0035249 | synaptic transmission, glutamatergic                        | 6.39E-07 |
| GO:0006941 | striated muscle contraction                                 | 7.22E-07 |
| GO:0097014 | ciliary plasm                                               | 7.34E-07 |
| GO:0045664 | regulation of neuron differentiation                        | 7.48E-07 |
| GO:0005930 | axoneme                                                     | 8.43E-07 |
| GO:0032838 | plasma membrane bounded cell projection cytoplasm           | 9.43E-07 |
| GO:0031674 | I band                                                      | 9.72E-07 |
| GO:0003700 | DNA-binding transcription factor activity                   | 1.25E-06 |
| GO:0017156 | calcium ion regulated exocytosis                            | 1.29E-06 |
| GO:0097485 | neuron projection guidance                                  | 1.42E-06 |
| GO:0017158 | regulation of calcium ion-dependent exocytosis              | 1.45E-06 |
| GO:0043679 | axon terminus                                               | 1.64E-06 |
| GO:2000300 | regulation of synaptic vesicle exocytosis                   | 1.80E-06 |
| GO:0007411 | axon guidance                                               | 2.09E-06 |
| GO:0048489 | synaptic vesicle transport                                  | 2.10E-06 |
| GO:0097480 | establishment of synaptic vesicle localization              | 2.10E-06 |
| GO:0015077 | monovalent inorganic cation transmembrane transporter act   | 2.25E-06 |
| GO:0051962 | positive regulation of nervous system development           | 2.72E-06 |
| GO:0032589 | neuron projection membrane                                  | 2.90E-06 |
| GO:0070588 | calcium ion transmembrane transport                         | 2.95E-06 |
| GO:0000981 | DNA-binding transcription factor activity, RNA polymerase   | 3.21E-06 |
| GO:0099095 | ligand-gated anion channel activity                         | 3.24E-06 |
| GO:2000463 | positive regulation of excitatory postsynaptic potential    | 3.35E-06 |
| GO:0015081 | sodium ion transmembrane transporter activity               | 3.92E-06 |
| GO:0099094 | ligand-gated cation channel activity                        | 4.37E-06 |
| GO:0007417 | central nervous system development                          | 4.49E-06 |
| GO:0016247 | channel regulator activity                                  | 4.66E-06 |
| GO:0050890 | cognition                                                   | 4.68E-06 |
| GO:0001653 | peptide receptor activity                                   | 4.84E-06 |
| GO:0008021 | synaptic vesicle                                            | 5.01E-06 |
| GO:0043266 | regulation of potassium ion transport                       | 5.71E-06 |
| GO:0042383 | sarcolemma                                                  | 5.72E-06 |
| GO:0030018 | Z disc                                                      | 5.93E-06 |
| GO:0035082 | axoneme assembly                                            | 6.27E-06 |
| GO:0008528 | G protein-coupled peptide receptor activity                 | 6.44E-06 |
| GO:0019226 | transmission of nerve impulse                               | 7.07E-06 |
| GO:0099560 | synaptic membrane adhesion                                  | 7.93E-06 |
| GO:2000311 | regulation of AMPA receptor activity                        | 7.93E-06 |
| GO:0070382 | exocytic vesicle                                            | 8.48E-06 |
| GO:0098693 | regulation of synaptic vesicle cycle                        | 8.76E-06 |
| GO:1904064 | positive regulation of cation transmembrane transport       | 1.02E-05 |
| GO:0016917 | GABA receptor activity                                      | 1.13E-05 |
| GO:0048589 | developmental growth                                        | 1.29E-05 |
| GO:0030672 | synaptic vesicle membrane                                   | 1.36E-05 |
| GO:0099501 | exocytic vesicle membrane                                   | 1.36E-05 |
| GO:0050877 | nervous system process                                      | 1.37E-05 |
| GO:0006814 | sodium ion transport                                        | 1.41E-05 |
| GO:0007193 | adenylate cyclase-inhibiting G protein-coupled receptor sig | 1.41E-05 |
| GO:0016324 | apical plasma membrane                                      | 1.71E-05 |
| GO:0060076 | excitatory synapse                                          | 1.71E-05 |
| GO:0010001 | glial cell differentiation                                  | 1.81E-05 |
| GO:1902710 | GABA receptor complex                                       | 1.82E-05 |
| GO:0032590 | dendrite membrane                                           | 1.99E-05 |
| GO:0035725 | sodium ion transmembrane transport                          | 2.16E-05 |

|            |                                                            |          |
|------------|------------------------------------------------------------|----------|
| GO:0005249 | voltage-gated potassium channel activity                   | 2.86E-05 |
| GO:0044449 | contractile fiber part                                     | 3.51E-05 |
| GO:0050805 | negative regulation of synaptic transmission               | 3.51E-05 |
| GO:0000977 | RNA polymerase II regulatory region sequence-specific DN   | 3.69E-05 |
| GO:0001012 | RNA polymerase II regulatory region DNA binding            | 3.69E-05 |
| GO:0034706 | sodium channel complex                                     | 3.71E-05 |
| GO:0006821 | chloride transport                                         | 3.95E-05 |
| GO:0008188 | neuropeptide receptor activity                             | 3.95E-05 |
| GO:1902711 | GABA-A receptor complex                                    | 4.75E-05 |
| GO:0007612 | learning                                                   | 5.64E-05 |
| GO:0042063 | gliogenesis                                                | 5.88E-05 |
| GO:0015893 | drug transport                                             | 6.01E-05 |
| GO:0034707 | chloride channel complex                                   | 6.44E-05 |
| GO:0005237 | inhibitory extracellular ligand-gated ion channel activity | 6.61E-05 |
| GO:1901379 | regulation of potassium ion transmembrane transport        | 6.74E-05 |
| GO:0099568 | cytoplasmic region                                         | 7.12E-05 |
| GO:0005254 | chloride channel activity                                  | 7.40E-05 |
| GO:2000310 | regulation of NMDA receptor activity                       | 7.67E-05 |
| GO:0034767 | positive regulation of ion transmembrane transport         | 8.49E-05 |
| GO:0007420 | brain development                                          | 9.01E-05 |
| GO:0099173 | postsynapse organization                                   | 9.63E-05 |
| GO:1903779 | regulation of cardiac conduction                           | 0.00011  |
| GO:0070252 | actin-mediated cell contraction                            | 0.00011  |
| GO:0007626 | locomotory behavior                                        | 0.00011  |
| GO:0051932 | synaptic transmission, GABAergic                           | 0.00012  |
| GO:0043292 | contractile fiber                                          | 0.00012  |
| GO:0072562 | blood microparticle                                        | 0.00013  |
| GO:1903169 | regulation of calcium ion transmembrane transport          | 0.00014  |
| GO:0030017 | sarcomere                                                  | 0.00014  |
| GO:0098656 | anion transmembrane transport                              | 0.00014  |
| GO:0001578 | microtubule bundle formation                               | 0.00015  |
| GO:0035418 | protein localization to synapse                            | 0.00015  |
| GO:0005253 | anion channel activity                                     | 0.00015  |
| GO:0050954 | sensory perception of mechanical stimulus                  | 0.00016  |
| GO:0015108 | chloride transmembrane transporter activity                | 0.00017  |
| GO:0031346 | positive regulation of cell projection organization        | 0.00017  |
| GO:0005231 | excitatory extracellular ligand-gated ion channel activity | 0.00018  |
| GO:0004890 | GABA-A receptor activity                                   | 0.00019  |
| GO:0010469 | regulation of signaling receptor activity                  | 0.00022  |
| GO:0032281 | AMPA glutamate receptor complex                            | 0.00022  |
| GO:0033268 | node of Ranvier                                            | 0.00022  |
| GO:0015698 | inorganic anion transport                                  | 0.00025  |
| GO:0044447 | axoneme part                                               | 0.00025  |
| GO:0002027 | regulation of heart rate                                   | 0.00025  |
| GO:0060048 | cardiac muscle contraction                                 | 0.00025  |
| GO:0003341 | cilium movement                                            | 0.00025  |
| GO:0048786 | presynaptic active zone                                    | 0.00028  |
| GO:0016529 | sarcoplasmic reticulum                                     | 0.00029  |
| GO:0007214 | gamma-aminobutyric acid signaling pathway                  | 0.00034  |
| GO:0099054 | presynapse assembly                                        | 0.00038  |
| GO:0048638 | regulation of developmental growth                         | 0.00042  |
| GO:0034704 | calcium channel complex                                    | 0.00043  |
| GO:1902476 | chloride transmembrane transport                           | 0.00051  |
| GO:0022851 | GABA-gated chloride ion channel activity                   | 0.00052  |
| GO:0016358 | dendrite development                                       | 0.00052  |
| GO:0005891 | voltage-gated calcium channel complex                      | 0.00053  |
| GO:0055001 | muscle cell development                                    | 0.00053  |
| GO:0030315 | T-tubule                                                   | 0.00054  |
| GO:0007605 | sensory perception of sound                                | 0.00054  |
| GO:0050769 | positive regulation of neurogenesis                        | 0.00055  |
| GO:0010976 | positive regulation of neuron projection development       | 0.00056  |
| GO:0099172 | presynapse organization                                    | 0.00057  |
| GO:0015103 | inorganic anion transmembrane transporter activity         | 0.00058  |
| GO:0051963 | regulation of synapse assembly                             | 0.00058  |
| GO:0008344 | adult locomotory behavior                                  | 0.00058  |
| GO:0086003 | cardiac muscle cell contraction                            | 0.00058  |
| GO:0033017 | sarcoplasmic reticulum membrane                            | 0.00058  |
| GO:0016528 | sarcoplasm                                                 | 0.00059  |
| GO:0030016 | myofibril                                                  | 0.00061  |
| GO:0005272 | sodium channel activity                                    | 0.00061  |
| GO:0099084 | postsynaptic specialization organization                   | 0.00068  |
| GO:0007613 | memory                                                     | 0.00072  |

|            |                                                                 |         |
|------------|-----------------------------------------------------------------|---------|
| GO:0099068 | postsynapse assembly                                            | 0.00073 |
| GO:0043194 | axon initial segment                                            | 0.00076 |
| GO:0086001 | cardiac muscle cell action potential                            | 0.00077 |
| GO:0048709 | oligodendrocyte differentiation                                 | 0.0008  |
| GO:0048813 | dendrite morphogenesis                                          | 0.00083 |
| GO:0060291 | long-term synaptic potentiation                                 | 0.00086 |
| GO:0007018 | microtubule-based movement                                      | 0.00086 |
| GO:0060322 | head development                                                | 0.00086 |
| GO:0051952 | regulation of amine transport                                   | 0.00089 |
| GO:0099106 | ion channel regulator activity                                  | 0.0009  |
| GO:0051924 | regulation of calcium ion transport                             | 0.00096 |
| GO:0044298 | cell body membrane                                              | 0.00097 |
| GO:0033555 | multicellular organismal response to stress                     | 0.00098 |
| GO:0046883 | regulation of hormone secretion                                 | 0.00105 |
| GO:0009582 | detection of abiotic stimulus                                   | 0.00105 |
| GO:0015837 | amine transport                                                 | 0.00109 |
| GO:0001764 | neuron migration                                                | 0.00111 |
| GO:0043195 | terminal bouton                                                 | 0.00117 |
| GO:0034764 | positive regulation of transmembrane transport                  | 0.00121 |
| GO:0050803 | regulation of synapse structure or activity                     | 0.00123 |
| GO:0001662 | behavioral fear response                                        | 0.00123 |
| GO:1901606 | alpha-amino acid catabolic process                              | 0.00127 |
| GO:0055002 | striated muscle cell development                                | 0.00127 |
| GO:0051966 | regulation of synaptic transmission, glutamatergic              | 0.00127 |
| GO:0015844 | monoamine transport                                             | 0.00129 |
| GO:0048588 | developmental cell growth                                       | 0.00129 |
| GO:0045666 | positive regulation of neuron differentiation                   | 0.00136 |
| GO:0009914 | hormone transport                                               | 0.00138 |
| GO:0019228 | neuronal action potential                                       | 0.00138 |
| GO:0099175 | regulation of postsynapse organization                          | 0.00143 |
| GO:0060292 | long-term synaptic depression                                   | 0.00144 |
| GO:0098698 | postsynaptic specialization assembly                            | 0.00147 |
| GO:0004970 | ionotropic glutamate receptor activity                          | 0.00149 |
| GO:2001259 | positive regulation of cation channel activity                  | 0.00157 |
| GO:0048640 | negative regulation of developmental growth                     | 0.00165 |
| GO:0051965 | positive regulation of synapse assembly                         | 0.00165 |
| GO:0097730 | non-motile cilium                                               | 0.00168 |
| GO:0009581 | detection of external stimulus                                  | 0.00172 |
| GO:0010752 | regulation of cGMP-mediated signaling                           | 0.00181 |
| GO:0006937 | regulation of muscle contraction                                | 0.00186 |
| GO:0050807 | regulation of synapse organization                              | 0.00188 |
| GO:0019233 | sensory perception of pain                                      | 0.00189 |
| GO:0010721 | negative regulation of cell development                         | 0.00192 |
| GO:0001917 | photoreceptor inner segment                                     | 0.00199 |
| GO:0044325 | ion channel binding                                             | 0.00205 |
| GO:0008277 | regulation of G protein-coupled receptor signaling pathway      | 0.00207 |
| GO:0010769 | regulation of cell morphogenesis involved in differentiation    | 0.00207 |
| GO:0002209 | behavioral defense response                                     | 0.00208 |
| GO:0032809 | neuronal cell body membrane                                     | 0.00216 |
| GO:0098563 | intrinsic component of synaptic vesicle membrane                | 0.00235 |
| GO:0050910 | detection of mechanical stimulus involved in sensory perception | 0.00235 |
| GO:0098739 | import across plasma membrane                                   | 0.00236 |
| GO:0030239 | myofibril assembly                                              | 0.00245 |
| GO:0097106 | postsynaptic density organization                               | 0.00246 |
| GO:0008509 | anion transmembrane transporter activity                        | 0.00246 |
| GO:0032414 | positive regulation of ion transmembrane transporter activity   | 0.00247 |
| GO:0030048 | actin filament-based movement                                   | 0.00247 |
| GO:0051937 | catecholamine transport                                         | 0.00253 |
| GO:0009063 | cellular amino acid catabolic process                           | 0.00254 |
| GO:0042552 | myelination                                                     | 0.0027  |
| GO:1901019 | regulation of calcium ion transmembrane transporter activity    | 0.00285 |
| GO:0098659 | inorganic cation import across plasma membrane                  | 0.00286 |
| GO:0099587 | inorganic ion import across plasma membrane                     | 0.00286 |
| GO:0031225 | anchored component of membrane                                  | 0.00296 |
| GO:0035235 | ionotropic glutamate receptor signaling pathway                 | 0.00305 |
| GO:0042596 | fear response                                                   | 0.00311 |
| GO:0045823 | positive regulation of heart contraction                        | 0.00311 |
| GO:0007422 | peripheral nervous system development                           | 0.00319 |
| GO:0097553 | calcium ion transmembrane import into cytosol                   | 0.00324 |
| GO:0043268 | positive regulation of potassium ion transport                  | 0.00334 |
| GO:0050770 | regulation of axonogenesis                                      | 0.00344 |
| GO:0046879 | hormone secretion                                               | 0.00344 |

|            |                                                                       |         |
|------------|-----------------------------------------------------------------------|---------|
| GO:0032411 | positive regulation of transporter activity                           | 0.00344 |
| GO:0060402 | calcium ion transport into cytosol                                    | 0.00367 |
| GO:0004983 | neuropeptide Y receptor activity                                      | 0.00379 |
| GO:0042472 | inner ear morphogenesis                                               | 0.00379 |
| GO:0042562 | hormone binding                                                       | 0.004   |
| GO:0060560 | developmental growth involved in morphogenesis                        | 0.00401 |
| GO:0016323 | basolateral plasma membrane                                           | 0.00406 |
| GO:0042923 | neuropeptide binding                                                  | 0.00411 |
| GO:0010644 | cell communication by electrical coupling                             | 0.00423 |
| GO:0007272 | ensheathment of neurons                                               | 0.00426 |
| GO:0008366 | axon ensheathment                                                     | 0.00426 |
| GO:0070509 | calcium ion import                                                    | 0.00441 |
| GO:0060401 | cytosolic calcium ion transport                                       | 0.00452 |
| GO:0099174 | regulation of presynapse organization                                 | 0.00461 |
| GO:1905606 | regulation of presynapse assembly                                     | 0.00461 |
| GO:0035176 | social behavior                                                       | 0.00464 |
| GO:0051703 | intraspecies interaction between organisms                            | 0.00464 |
| GO:0050771 | negative regulation of axonogenesis                                   | 0.00464 |
| GO:0010927 | cellular component assembly involved in morphogenesis                 | 0.00486 |
| GO:0051899 | membrane depolarization                                               | 0.00506 |
| GO:0030285 | integral component of synaptic vesicle membrane                       | 0.00516 |
| GO:0022011 | myelination in peripheral nervous system                              | 0.00539 |
| GO:0032292 | peripheral nervous system axon ensheathment                           | 0.00539 |
| GO:0010771 | negative regulation of cell morphogenesis involved in differentiation | 0.00578 |
| GO:0098661 | inorganic anion transmembrane transport                               | 0.00591 |
| GO:0051961 | negative regulation of nervous system development                     | 0.00596 |
| GO:0007601 | visual perception                                                     | 0.00629 |
| GO:0007389 | pattern specification process                                         | 0.00633 |
| GO:0050768 | negative regulation of neurogenesis                                   | 0.00633 |
| GO:0050953 | sensory perception of light stimulus                                  | 0.00656 |
| GO:0043583 | ear development                                                       | 0.00688 |
| GO:0099569 | presynaptic cytoskeleton                                              | 0.00735 |
| GO:0017157 | regulation of exocytosis                                              | 0.00749 |
| GO:0010720 | positive regulation of cell development                               | 0.00781 |
| GO:0015800 | acidic amino acid transport                                           | 0.00781 |
| GO:1903524 | positive regulation of blood circulation                              | 0.00781 |
| GO:0022604 | regulation of cell morphogenesis                                      | 0.00782 |
| GO:0050974 | detection of mechanical stimulus involved in sensory perception       | 0.00786 |
| GO:0008066 | glutamate receptor activity                                           | 0.00804 |
| GO:1901016 | regulation of potassium ion transmembrane transporter activity        | 0.00837 |
| GO:0042165 | neurotransmitter binding                                              | 0.00888 |
| GO:0050796 | regulation of insulin secretion                                       | 0.009   |
| GO:0090276 | regulation of peptide hormone secretion                               | 0.00929 |
| GO:0031345 | negative regulation of cell projection organization                   | 0.00942 |
| GO:1903305 | regulation of regulated secretory pathway                             | 0.00955 |
| GO:0042471 | ear morphogenesis                                                     | 0.00955 |
| GO:0099528 | G protein-coupled neurotransmitter receptor activity                  | 0.01006 |
| GO:0061669 | spontaneous neurotransmitter secretion                                | 0.01025 |
| GO:0048839 | inner ear development                                                 | 0.01034 |
| GO:0008307 | structural constituent of muscle                                      | 0.01112 |
| GO:1990138 | neuron projection extension                                           | 0.01131 |
| GO:0045956 | positive regulation of calcium ion-dependent exocytosis               | 0.01149 |
| GO:0015085 | calcium ion transmembrane transporter activity                        | 0.01153 |
| GO:0031594 | neuromuscular junction                                                | 0.01158 |
| GO:0006942 | regulation of striated muscle contraction                             | 0.01177 |
| GO:0086002 | cardiac muscle cell action potential involved in contraction          | 0.01186 |
| GO:0001518 | voltage-gated sodium channel complex                                  | 0.01204 |
| GO:0021885 | forebrain cell migration                                              | 0.01205 |
| GO:0045665 | negative regulation of neuron differentiation                         | 0.0126  |
| GO:0043950 | positive regulation of cAMP-mediated signaling                        | 0.01275 |
| GO:0097107 | postsynaptic density assembly                                         | 0.01318 |
| GO:0021795 | cerebral cortex cell migration                                        | 0.0134  |
| GO:0002028 | regulation of sodium ion transport                                    | 0.01356 |
| GO:0043198 | dendritic shaft                                                       | 0.01384 |
| GO:0030072 | peptide hormone secretion                                             | 0.01402 |
| GO:0048639 | positive regulation of developmental growth                           | 0.01424 |
| GO:0051146 | striated muscle cell differentiation                                  | 0.01424 |
| GO:0031045 | dense core granule                                                    | 0.0146  |
| GO:0045214 | sarcomere organization                                                | 0.01552 |
| GO:0010522 | regulation of calcium ion transport into cytosol                      | 0.01587 |
| GO:0098686 | hippocampal mossy fiber to CA3 synapse                                | 0.01587 |
| GO:0019934 | cGMP-mediated signaling                                               | 0.01599 |

|            |                                                               |         |
|------------|---------------------------------------------------------------|---------|
| GO:0050982 | detection of mechanical stimulus                              | 0.0169  |
| GO:0030073 | insulin secretion                                             | 0.01802 |
| GO:0005858 | axonemal dynein complex                                       | 0.01845 |
| GO:0031630 | regulation of synaptic vesicle fusion to presynaptic active z | 0.01846 |
| GO:0060997 | dendritic spine morphogenesis                                 | 0.01846 |
| GO:1901381 | positive regulation of potassium ion transmembrane transp     | 0.01846 |
| GO:0015872 | dopamine transport                                            | 0.01949 |
| GO:0005262 | calcium channel activity                                      | 0.01991 |
| GO:1905114 | cell surface receptor signaling pathway involved in cell-cell | 0.02163 |
| GO:0022029 | telencephalon cell migration                                  | 0.02163 |
| GO:0051705 | multi-organism behavior                                       | 0.02163 |
| GO:0090257 | regulation of muscle system process                           | 0.02163 |
| GO:0007528 | neuromuscular junction development                            | 0.02234 |
| GO:0031280 | negative regulation of cyclase activity                       | 0.02368 |
| GO:0043949 | regulation of cAMP-mediated signaling                         | 0.02386 |
| GO:0090596 | sensory organ morphogenesis                                   | 0.02456 |
| GO:0050432 | catecholamine secretion                                       | 0.02462 |
| GO:0086065 | cell communication involved in cardiac conduction             | 0.02462 |
| GO:0005516 | calmodulin binding                                            | 0.02464 |
| GO:0046658 | anchored component of plasma membrane                         | 0.02497 |
| GO:0051968 | positive regulation of synaptic transmission, glutamatergic   | 0.02576 |
| GO:0004181 | metallocarboxypeptidase activity                              | 0.02578 |
| GO:0031253 | cell projection membrane                                      | 0.02637 |
| GO:0007618 | mating                                                        | 0.02658 |
| GO:0098814 | spontaneous synaptic transmission                             | 0.02658 |
| GO:0016082 | synaptic vesicle priming                                      | 0.02658 |
| GO:0050773 | regulation of dendrite development                            | 0.02683 |
| GO:0007158 | neuron cell-cell adhesion                                     | 0.02732 |
| GO:0055117 | regulation of cardiac muscle contraction                      | 0.02749 |
| GO:0001504 | neurotransmitter uptake                                       | 0.02757 |
| GO:0050433 | regulation of catecholamine secretion                         | 0.02757 |
| GO:0050879 | multicellular organismal movement                             | 0.02757 |
| GO:0050881 | musculoskeletal movement                                      | 0.02757 |
| GO:0010977 | negative regulation of neuron projection development          | 0.02987 |
| GO:1904427 | positive regulation of calcium ion transmembrane transport    | 0.03158 |
| GO:1990573 | potassium ion import across plasma membrane                   | 0.03328 |
| GO:0008503 | benzodiazepine receptor activity                              | 0.03331 |
| GO:0005248 | voltage-gated sodium channel activity                         | 0.03368 |
| GO:0086010 | membrane depolarization during action potential               | 0.03412 |
| GO:0014704 | intercalated disc                                             | 0.0345  |
| GO:0050905 | neuromuscular process                                         | 0.03511 |
| GO:0098858 | actin-based cell projection                                   | 0.03793 |
| GO:0006835 | dicarboxylic acid transport                                   | 0.03805 |
| GO:0097120 | receptor localization to synapse                              | 0.03805 |
| GO:1902475 | L-alpha-amino acid transmembrane transport                    | 0.03805 |
| GO:0005245 | voltage-gated calcium channel activity                        | 0.03905 |
| GO:0022848 | acetylcholine-gated cation-selective channel activity         | 0.03905 |
| GO:0032228 | regulation of synaptic transmission, GABAergic                | 0.03924 |
| GO:0021953 | central nervous system neuron differentiation                 | 0.04108 |
| GO:0086009 | membrane repolarization                                       | 0.04162 |
| GO:0017046 | peptide hormone binding                                       | 0.04166 |
| GO:0045745 | positive regulation of G protein-coupled receptor signaling   | 0.04518 |
| GO:0042692 | muscle cell differentiation                                   | 0.04562 |
| GO:0030658 | transport vesicle membrane                                    | 0.04563 |
| GO:0007631 | feeding behavior                                              | 0.0467  |
| GO:0001750 | photoreceptor outer segment                                   | 0.04724 |
| GO:0060170 | ciliary membrane                                              | 0.04724 |
| GO:0005540 | hyaluronic acid binding                                       | 0.04758 |
